# Supplementary material for: Diastereoselective access to [4,4]-carbospirocycles: governance of thermodynamic enolates with an organocatalyst in vinylogous cascade annulation
Source: Royal Society of Chemistry journal article supplement (doi:10.1039/d1cc06544k), 2022-01-01

***-Electronic Supplementary Information-***

**Diastereoselective Access to [4,4]-Carbospirocycles: Governance of Thermodynamic Enolates with Organocatalyst in Vinylogous Cascade Annulation**

Vinod Bhajammanavar,<sup>a</sup> Sumitava Mallik,<sup>a</sup> Venkata Surya Kumar Choutipalli,<sup>b</sup>  
Venkatesan Subramanian,<sup>b</sup> and Mahiuddin Baidya\*<sup>a</sup>

*<sup>a</sup>Department of Chemistry, Indian Institute of Technology Madras,  
Chennai 600 036, Tamil Nadu, India.*

*<sup>b</sup>Inorganic and Physical Chemistry Laboratory, CSIR-Central Leather Research Institute,  
Chennai 600 020, Tamil Nadu, India.*

*E-mail: mbaidya@iitm.ac.in*

## Table of Contents

|                                                                        | <b>Page</b> |
|------------------------------------------------------------------------|-------------|
| <b>General Experimental Information</b>                                | <b>S3</b>   |
| <b>Optimization of [4,4]-Carbospiroannulation Reaction Conditions</b>  | <b>S4</b>   |
| <b>General Procedure for the Synthesis of [4,4]-Carbospirocycles 3</b> | <b>S5</b>   |
| <b>Procedure for the Gram Scale Synthesis of Compound 3a</b>           | <b>S5</b>   |
| <b>Post-Functionalizations</b>                                         |             |
| i. <b>Chemoselective Reduction for the Synthesis of Compound 8</b>     | <b>S6</b>   |
| ii. <b>Synthesis of Triketone Spirocyclic Compound 9</b>               | <b>S6</b>   |
| iii. <b>Synthesis of <i>N</i>-Protected Carbospirocycle 10</b>         | <b>S7</b>   |
| <b>Skeletal Rearrangement Reactions</b>                                |             |
| <b>Synthesis of Pyrimidine Fused Spirocycles 11</b>                    | <b>S7</b>   |
| <b>Mechanistic Investigations:</b>                                     |             |
| i. <b>Isolation of Intermediate 5a</b>                                 | <b>S8</b>   |
| ii. <b>Spiroannulation Reaction with Intermediate 5a</b>               | <b>S8</b>   |
| <b>Skeletal Rearrangement Mechanism</b>                                |             |
| <b>Possible Mechanism for Pyrimidine Fused Carbospirocycles 11</b>     | <b>S9</b>   |
| <b>List of Detailed References 4, 7, and 8 from the Manuscript</b>     | <b>S9</b>   |
| <b>Crystallographic Experimental Section</b>                           | <b>S10</b>  |
| <b>Computational Details</b>                                           | <b>S15</b>  |
| <b>Spectroscopic Data of Synthesized Compounds</b>                     | <b>S21</b>  |
| <b>NMR Spectra of Synthesized Compounds</b>                            | <b>S36</b>  |

## General Experimental Information

All non-aqueous reactions were carried out in flame-dried glassware and were stirred using a magnetic stir plate. All reactions were carried out using anhydrous solvent unless otherwise noted. DMSO and DMF were purchased from Acros Organic company. Dry toluene, xylene, mesitylene, tetrahydrofuran and chlorobenzene were prepared by distilling over sodium ketyl. Dry DCE and CH<sub>3</sub>CN were prepared by distilling over calcium hydride. Quinidine, quinine, cinchonine, and cinchonidine were purchased from Aldrich company.

All reactions were monitored by thin layer chromatography (TLC) on WhatmanPartisil® K6F TLC plates (silica gel 60 Å, 0.25 mm thickness) and visualized using a UV lamp (366 or 254 nm) or by use of one of the following visualization reagents: PMA: 10 g phosphomolybdic acid/ 100 mL ethanol, KMnO<sub>4</sub>: 0.75 g potassium permanganate, 5 g K<sub>2</sub>CO<sub>3</sub> / 100 mL water. Products were isolated by column chromatography (Merck silica gel 100-200µm). Yields refer to chromatographically and spectroscopically homogenous materials unless noted otherwise. <sup>13</sup>C and <sup>1</sup>H NMR spectra were recorded on a Bruker 400 or Bruker 500 MHz spectrometers. Chemical shift values (δ) are reported in ppm and calibrated to the residual solvent peak CDCl<sub>3</sub> δ = 7.260 ppm for <sup>1</sup>H, δ = 77.160 ppm for <sup>13</sup>C, DMSO-d<sub>6</sub> δ = 2.500 ppm for <sup>1</sup>H, δ = 39.500 ppm for <sup>13</sup>C or calibrated to tetramethylsilane (δ = 0.00). All NMR spectra were recorded at ambient temperature (290 K) unless otherwise noted. <sup>1</sup>H NMR spectra are reported as follows: chemical shift (multiplicity, coupling constant, integration). The following abbreviations are used to indicate multiplicities: s, singlet; d, doublet; t, triplet; q, quartet; m, multiplet; dd, doublet of doublet; dt, doublet of triplet; dq, doublet of quartet; td, triplet of doublet; ddd, doublet of doublet of doublet; br, broad; app, apparent.

Mass spectra were recorded by electron spray ionization (ESI) method on a Q-TOF Micro with lock spray source. The crystal data were collected and integrated using a BrukerAxs kappa apex2 CCD diffractometer, with graphite monochromated Mo-Kα radiation.

The vinyl malononitriles<sup>1</sup> **1** and cyclopentene-1,3-diones<sup>2</sup> **2** were synthesized following literature procedures published previously.

### References:

- (1) a) J. Lu, F. Liu and T.-P. Loh, *Adv. Synth. Catal.* 2008, **350**, 1781-1784; b) X. Li, X. Xu, W. Wei, A. Lin and H. Yao, *Org. Lett.* 2016, **18**, 428-431.
- (2) a) M. S. Manna and S. Mukherjee, *Chem. Sci.* 2014, **5**, 1627-1633; b) Q. Gong, J. Wen and X. Zhang, *Chem. Sci.* 2019, **10**, 6350-6353.

**Table S1: Optimization of [4,4]-Carbospiroannulation Reaction Conditions<sup>a</sup>**

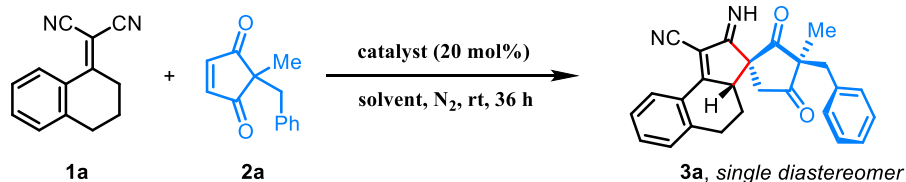

| entry    | solvent                       | catalyst                                                          | yield (%) <sup>b</sup> |
|----------|-------------------------------|-------------------------------------------------------------------|------------------------|
| 1        | DCE                           | quinidine                                                         | 73                     |
| 2        | THF                           | quinidine                                                         | 69                     |
| 3        | CH <sub>3</sub> CN            | quinidine                                                         | trace                  |
| <b>4</b> | <b>Toluene</b>                | <b>quinidine</b>                                                  | <b>84</b>              |
| 5        | Mesitylene                    | quinidine                                                         | 66                     |
| 6        | PhCl                          | quinidine                                                         | 51                     |
| 7        | Toluene                       | quinine                                                           | 73                     |
| 8        | Toluene                       | cinchonine                                                        | 47                     |
| 9        | Toluene                       | cinchonidine                                                      | 40                     |
| 10       | Toluene                       | thiourea-I                                                        | 20                     |
| 11       | Toluene                       | squaramide-I                                                      | 27                     |
| 12       | Toluene                       | (DHQD) <sub>2</sub> PYR                                           | 25                     |
| 13       | Toluene                       | (DHQD) <sub>2</sub> PHAL                                          | 16                     |
| 14       | Toluene                       | DBU                                                               | 33 (70) <sup>d</sup>   |
| 15       | Toluene                       | DBN                                                               | 27 (64) <sup>d</sup>   |
| 16       | Toluene                       | DMAP                                                              | trace                  |
| 17       | Toluene                       | <sup>t</sup> Pr <sub>2</sub> NEt                                  | NR                     |
| 18       | Toluene                       | DABCO                                                             | trace                  |
| 19       | Toluene                       | 3-quinuclidinol                                                   | 59 <sup>e</sup>        |
| 20       | Toluene                       | LiO <sup>t</sup> Bu/KO <sup>t</sup> Bu                            | 27/36 <sup>e</sup>     |
| 21       | Toluene                       | K <sub>2</sub> CO <sub>3</sub> or Cs <sub>2</sub> CO <sub>3</sub> | trace                  |
| 22       | Toluene+5μl H <sub>2</sub> O  | quinidine                                                         | 35                     |
| 23       | Toluene+50μl H <sub>2</sub> O | quinidine                                                         | NR                     |
| 24       | Toluene                       | —                                                                 | NR                     |

  

|                                                                                                                        |                                                                                                                                                                                                                   |
|------------------------------------------------------------------------------------------------------------------------|-------------------------------------------------------------------------------------------------------------------------------------------------------------------------------------------------------------------|
| <p>Undesired products:</p> <p style="display: flex; justify-content: space-around;"><span>4a</span><span>5a</span></p> | <p>Chiral organocatalysts:</p> <p style="display: flex; justify-content: space-around;"><span>thiourea-I</span><span>squaramide-I</span><span>(DHQD)<sub>2</sub>PYR</span><span>(DHQD)<sub>2</sub>PHAL</span></p> |
|------------------------------------------------------------------------------------------------------------------------|-------------------------------------------------------------------------------------------------------------------------------------------------------------------------------------------------------------------|

<sup>a</sup>Reaction conditions: **1a** (0.22 mmol), **2a** (0.26 mmol), N<sub>2</sub>, solvent (4 mL), rt, 36 h. <sup>b</sup>Isolated yields were provided. The dr was determined by <sup>1</sup>H NMR analysis of crude reaction mixture. <sup>c</sup>Combined yield of **3a** and **5a**. <sup>d</sup>Reaction was stopped after 24 h. <sup>e</sup>Yield corresponds to (4+2) annulation product **4a**. NR: No reaction.



### General Procedure for the Synthesis of [4,4]-Carbospirocycles **3**:

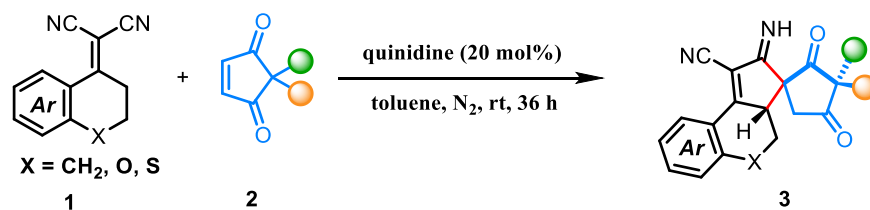

The alkylidene malononitriles **1** (0.22 mmol, 1 equiv), cyclopentene-1,3-diones **2** (0.26 mmol, 1.2 equiv), and quinidine (20 mol%) were taken in a 16×100 mm oven dried reaction tube equipped with a magnetic stir. The reaction tube was capped with a rubber septum, evacuated, and backfilled with nitrogen gas. Then, dry toluene (4 mL) was added via a syringe under nitrogen. The reaction mixture was allowed to stir at room temperature for 36 h. After completion, the crude reaction mixture was loaded directly onto silica gel column and purified with a gradient eluent of hexane and ethyl acetate (5→15% EtOAc: hexane) to provide pure spirocyclic imine **3**.

*Note: DBU (20 mol%) base was used instead of quinidine and reaction was stopped after 24 h during the synthesis of compounds **3ao** to **3at**.*

### Procedure for the Gram Scale Synthesis of Compound **3a**:

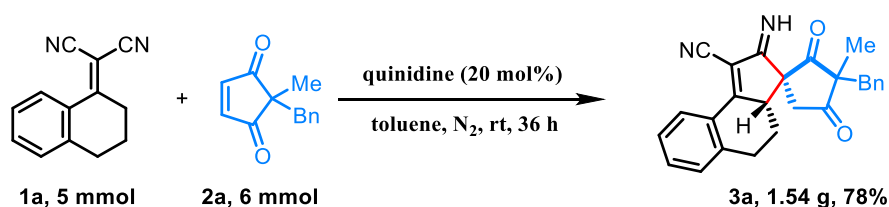

The  $\alpha$ -tetralone derived malononitrile **1a** (0.97 g, 5.0 mmol, 1 equiv), cyclopentene-1, 3-dione **2a** (1.2 g, 6.0 mmol, 1.2 equiv), and quinidine (324 mg, 20 mol%) were taken in a 100 mL oven dried round bottom flask equipped with a magnetic stir. The round bottom flask was capped with a rubber septum, evacuated, and backfilled with nitrogen gas. Then, dry toluene (15 mL) was added via syringe under nitrogen. The mixture was allowed to stir at room temperature for 36 h. After completion, volatiles were carefully evaporated, and the crude product obtained was loaded directly onto silica gel column and purified with a gradient eluent of hexane and ethyl acetate (5→15% EtOAc: hexane) to provide pure spirocyclic imine **3a** (1.54 g, 78% yield).

## Post-Functionalizations

### i. Chemoselective Reduction for the Synthesis of Compound **8**:

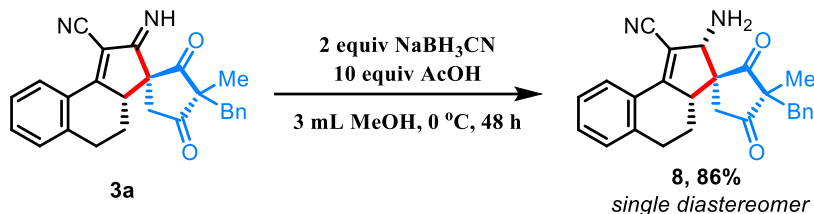

The product **3a** (0.22 mmol, 1 equiv) was taken in a 16×100 mm oven dried reaction tube equipped with a magnetic stir. The reaction tube was capped with a rubber septum, evacuated and backfilled with nitrogen gas. Then, dry MeOH (3 mL) and acetic acid (10 equiv) were added via syringe. The reaction mixture was cooled to 0 °C. Sodium cyanoborohydride (2 equiv) was added portion wise and reaction mixture was allowed to stir for 48 h at 0 °C. Then, the reaction mixture was quenched with aq. NH<sub>4</sub>Cl solution, and extracted with DCM. The crude product obtained after evaporation of DCM was loaded directly onto silica gel column and purified with a gradient eluent of hexane and ethyl acetate (15→35% EtOAc: hexane) to provide pure spirocyclic amine **8** (75 mg, 86% yield) as a single diastereomer.

### ii. Synthesis of Triketone Spirocyclic Compound **9**:

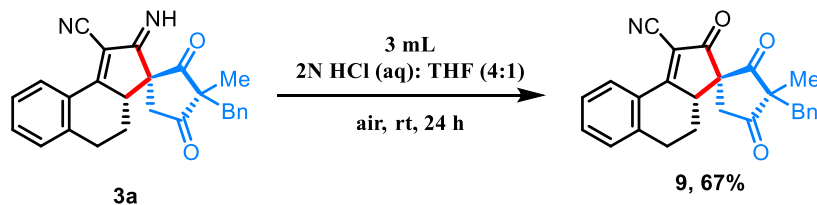

The product **3a** (0.22 mmol, 1 equiv) was taken in a 16×100 mm oven dried reaction tube equipped with a magnetic stir. The reaction tube was capped with a rubber septum. Then, 3 mL of 2N HCl (aq): THF (4:1) mixture were added via syringe. The reaction mixture was allowed to stir for 24 h. The reaction mixture was quenched with aq. NaCl solution and extracted with DCM. The crude product obtained after evaporation of DCM was loaded directly onto silica gel column and purified with a gradient eluent of hexane and ethyl acetate (5→15% EtOAc: hexane) to provide pure triketone spirocyclic compound **9** (58 mg, 67% yield) as a single diastereomer.

### iii. Synthesis of *N*-Protected Carbospirocycle **10**:

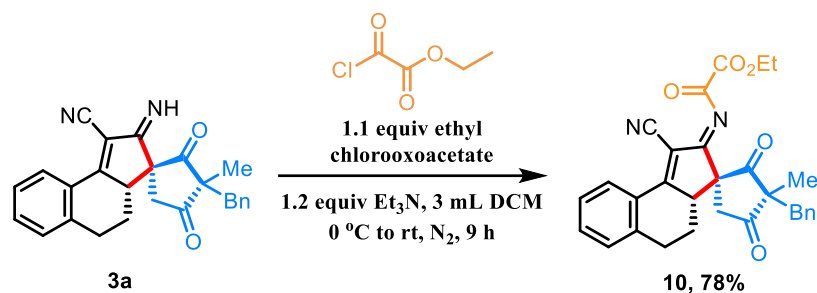

The product **3a** (0.22 mmol, 1 equiv) was taken in a 16×100 mm oven dried reaction tube equipped with a magnetic stir. The reaction tube was capped with a rubber septum, evacuated, and backfilled with nitrogen gas. Then, dry DCM (3 mL) and Et<sub>3</sub>N (1.2 equiv) were added via syringe. The reaction mixture was cooled to 0 °C. Ethyl chlorooxoacetate (1.1 equiv) was added and reaction mixture was allowed to attain room temperature with stirring. After 9 h (TLC monitored), reaction mixture was quenched with aq. NH<sub>4</sub>Cl solution, and extracted with DCM. After evaporation, the crude product was purified by crystallization technique using DCM and hexane solvents combination to get pure *N*-protected spirocycle **10** (85 mg, 78% yield) as a single diastereomer.

### Skeletal Rearrangement Reactions

#### Synthesis of Pyrimidine Fused Spirocycles **11**:

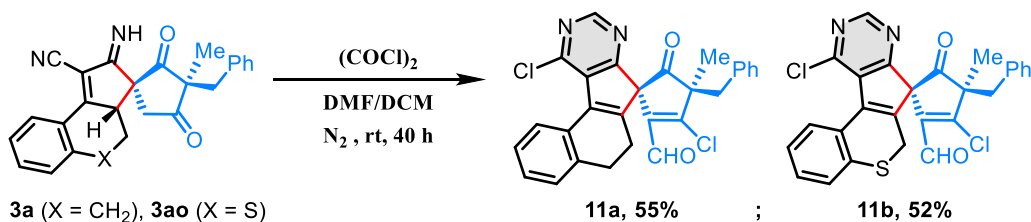

The corresponding spirocyclic product **3a** or **3ao** (0.2 mmol, 1 equiv) was taken in a 16×100 mm oven dried reaction tube equipped with a magnetic stir. The reaction tube was capped with a rubber septum, evacuated and backfilled with nitrogen gas. Then, dry DCM (2 mL) followed by dry DMF (50  $\mu$ L) were added via syringe. The reaction mixture was cooled to 0 °C and oxalyl chloride (10 equiv) was added drop wise to the reaction mixture at 0 °C under the positive pressure of nitrogen gas (balloon). The reaction mixture was allowed to attain room temperature with stirring and stirred further for 40 h. After completion (TLC monitored), reaction mixture was workup with ice-cold brine solution, and extracted with DCM. Resulting organic layer was dried over anhydrous Na<sub>2</sub>SO<sub>4</sub>. The crude product obtained after evaporation of DCM was loaded directly onto silica gel column and purified with a gradient eluent of hexane and ethyl acetate (10→25% EtOAc: hexane) to provide pure indane-1,3-dione derivative **11a** (59 mg, 55%) or **11b** (58 mg, 52%) respectively.

## Mechanistic Investigations

### Isolation of Reaction Intermediate **5a**:

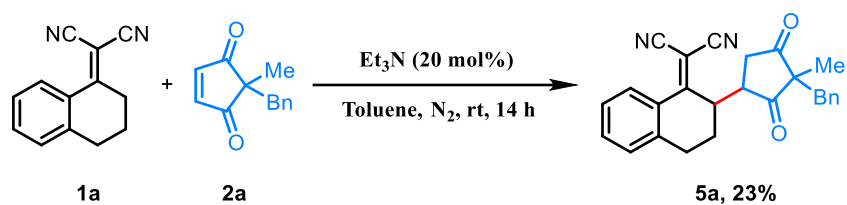

The  $\alpha$ -tetralone derived malononitriles **1a** (0.22 mmol, 1 equiv), cyclopentene-1,3-diones **2a** (0.26 mmol, 1.2 equiv), and  $\text{Et}_3\text{N}$  (20 mol%) were taken in a 16×100 mm oven dried reaction tube equipped with a magnetic stir. The reaction tube was capped with a rubber septum, evacuated, and backfilled with nitrogen gas. Then, toluene (4 mL) was added via syringe. The mixture was allowed to stir at room temperature for 14 h. The crude reaction mixture was loaded directly onto silica gel column and purified with a gradient eluent of hexane and ethyl acetate (5→15% EtOAc: hexane) to provide Michael addition product **5a** (20 mg, 23% yield).

### Spiroannulation Reaction with Intermediate **5a**:

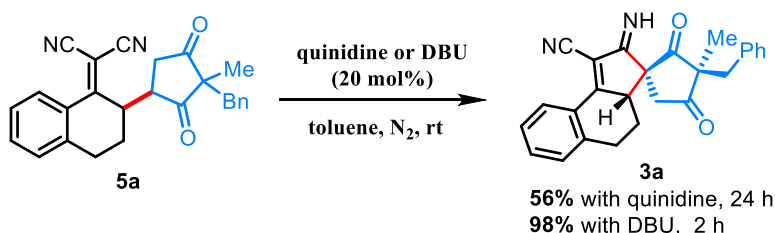

Isolated reaction intermediate **5a** (0.02 mmol, 1 equiv) and DBU (20 mol%) were taken in a 16×100 mm oven dried reaction tube equipped with a magnetic stir. The reaction tube was capped with a rubber septum, evacuated and backfilled with nitrogen gas. Then, dry toluene (2 mL) was added via syringe. The reaction mixture was allowed to stir at room temperature for 2 h. After completion (TLC monitored), the crude reaction mixture was loaded directly onto silica gel column and purified with a gradient eluent of hexane and ethyl acetate (5→15% EtOAc: hexane) to provide pure spirocyclic imine **3a** in 98% yield. Execution of the same reaction with quinidine catalyst resulted in 56% yield (44 mg) of spirocyclic imine **3a** after 24 h.

## Skeletal Rearrangement Mechanism

### Possible Mechanism for Pyrimidine Fused Carbospirocycles 11

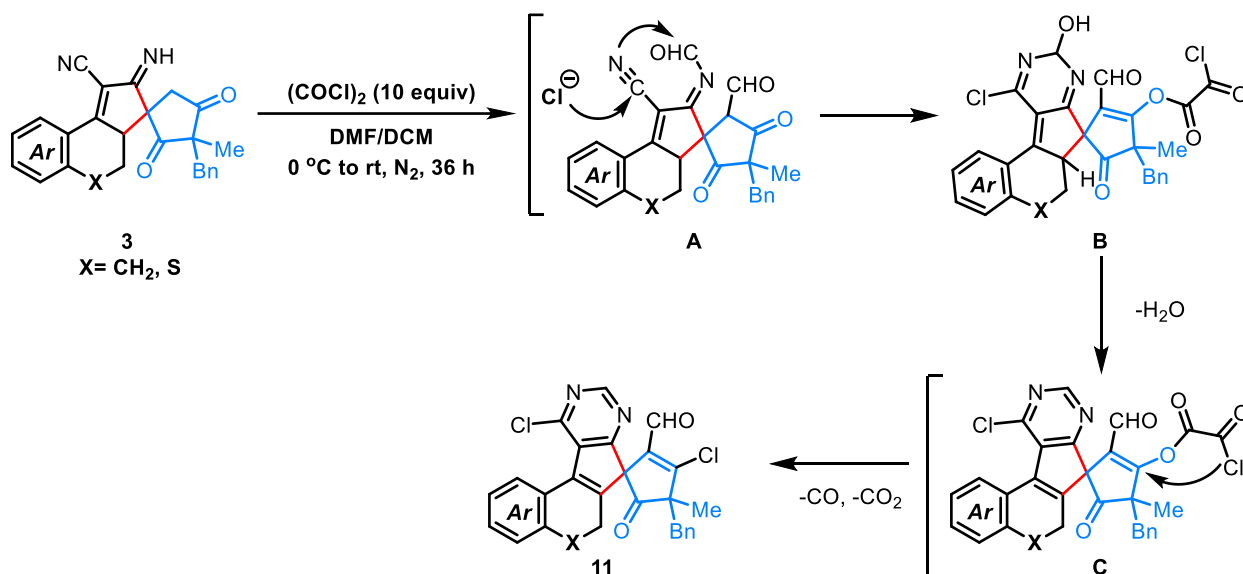

### List of detailed references 4, 7, and 8 from the manuscript

- (a) T. H. Babu, A. A. Joseph, D. Muralidharan and P. T. Perumal, *Tetrahedron Lett.* 2010, **51**, 994-996; (b) X.-M. Shi, W.-P. Dong, L.-P. Zhu, X.-X. Jiang and R. Wang, *Adv. Synth. Catal.* 2013, **355**, 3119-3123; (c) S. E. Kiruthika, P. T. Perumal, C. Balachandran and S. Ignacimuthu, *J. Chem. Sci.* 2014, **126**, 177-185; (d) T.-Z. Li, J. Xie, Y. Jiang, F. Sha and X.-Y. Wu, *Adv. Synth. Catal.* 2015, **357**, 3507-3511; (e) H. Mei, L. Lin, B. Shen, X. Liu and X. Feng, *Org. Chem. Front.* 2018, **5**, 2505-2509; (f) H.-L. Cui, X. Tang, M.-F. Li, X.-J. Xu and Y. Shi, *Synlett* 2019, **30**, 845-850; (g) Z. Zhou, Q. He, Y. Jiang, Q. Ouyang, W. Du and Y.-C. Chen, *Org. Lett.* 2019, **21**, 7184-7188; (h) P.-W. Xu, J.-S. Yu, C. Chen, Z.-Y. Cao, F. Zhou and J. Zhou, *ACS Catal.* 2019, **9**, 1820-1882.
- For metal-catalyzed synthesis of spiro[4,4]nonane frameworks, see: (a) R. Rios, *Chem. Soc. Rev.* 2012, **41**, 1060-1074; (b) T. Takahashi, H. Tsutsui, M. Tamura, S. Kitagaki, M. Nakajima and S. Hashimoto, *Chem. Commun.* 2001, 1604-1605; (c) A. Wada, K. Noguchi, M. Hirano and K. Tanaka, *Org. Lett.* 2007, **9**, 1295-1298; (d) Z. Han, Z. Wang and K. Ding, *Adv. Synth. Catal.* 2011, **353**, 1584-1590; (e) Z. Chai and T. J. Rainey, *J. Am. Chem. Soc.* 2012, **134**, 3615-3618; (f) Z. Zheng, Y. Cao, Q. Chong, Z. Han, J. Ding, C. Luo, Z. Wang, D. Zhu, Q.-L. Zhou and K. Ding, *J. Am. Chem. Soc.* 2018, **140**, 10374-10381; (g) L. Yin, J. Xing, Y. Wang, Y. Shen, T. Lu, T. Hayashi and X. Dou, *Angew. Chem. Int. Ed.* 2019, **58**, 2474-2478.
- (a) S. Zhuo, T. Zhu, L. Zhou, C. Mou, H. Chai, Y. Lu, L. Pan, Z. Jin and Y. R. Chi, *Angew. Chem. Int. Ed.* 2019, **58**, 1784-1788; (b) E. Sánchez-Larios, J. M. Holmes, C. L. Daschner and M. Gravel, *Org. Lett.* 2010, **12**, 5772-5775; (c) S. Barik, S. Shee, S. Das, R. G. Gonnade, G. Jindal, S. Mukherjee and A. T. Biju, *Angew. Chem. Int. Ed.* 2021, **60**, 12264-12268; (d) B.-M. Yang, P.-J. Cai, Y.-Q. Tu, Z.-X. Yu, Z.-M. Chen, S.-H. Wang, S.-H. Wang and F.-M. Zhang, *J. Am. Chem. Soc.* 2015, **137**, 8344-8347; (e) S. Li, J.-W. Zhang, X.-L. Li, D.-J. Cheng and B. Tan, *J. Am. Chem. Soc.* 2016, **138**, 16561-16566; (f) J. Liu, Q. Li, Y. Wei and M. Shi, *Org. Lett.* 2020, **22**, 2494-2499.

## Crystallographic Experimental Section:

Crystals of compounds **3b**, **3aa**, **3aq**, and **11a** were obtained through slow evaporation technique at room temperature from their respective solution in hexane: DCM solvent combinations.

**Crystal data and structure refinement for compound 3b** (CCDC 2096229, Ellipsoid Probability 50%):

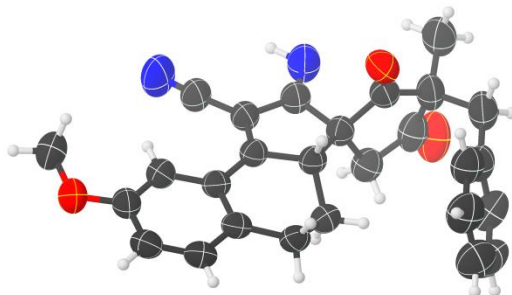

|                                   |                                                               |                                           |
|-----------------------------------|---------------------------------------------------------------|-------------------------------------------|
| Identification code               | Compound <b>3b</b>                                            |                                           |
| Empirical formula                 | C <sub>27</sub> H <sub>24</sub> N <sub>2</sub> O <sub>3</sub> |                                           |
| Formula weight                    | 424.48                                                        |                                           |
| Temperature                       | 296(2) K                                                      |                                           |
| Wavelength                        | 1.54178 Å                                                     |                                           |
| Crystal system                    | Monoclinic                                                    |                                           |
| Space group                       | P2 <sub>1</sub>                                               |                                           |
| Unit cell dimensions              | a = 9.7603(4) Å<br>b = 7.2351(3) Å<br>c = 15.8107(6) Å        | a = 90°.<br>b = 92.4650(10)°.<br>g = 90°. |
| Volume                            | 1115.47(8) Å <sup>3</sup>                                     |                                           |
| Z                                 | 2                                                             |                                           |
| Density (calculated)              | 1.264 Mg/m <sup>3</sup>                                       |                                           |
| Absorption coefficient            | 0.664 mm <sup>-1</sup>                                        |                                           |
| F(000)                            | 448                                                           |                                           |
| Crystal size                      | 0.300 x 0.250 x 0.200 mm <sup>3</sup>                         |                                           |
| Theta range for data collection   | 4.534 to 72.312°.                                             |                                           |
| Index ranges                      | -12<=h<=11, -8<=k<=8, -19<=l<=19                              |                                           |
| Reflections collected             | 14745                                                         |                                           |
| Independent reflections           | 4304 [R(int) = 0.0438]                                        |                                           |
| Completeness to theta = 67.679°   | 99.0 %                                                        |                                           |
| Absorption correction             | Semi-empirical from equivalents                               |                                           |
| Max. and min. transmission        | 0.7536 and 0.6183                                             |                                           |
| Refinement method                 | Full-matrix least-squares on F <sup>2</sup>                   |                                           |
| Data / restraints / parameters    | 4304 / 1 / 296                                                |                                           |
| Goodness-of-fit on F <sup>2</sup> | 1.080                                                         |                                           |
| Final R indices [I>2sigma(I)]     | R1 = 0.0484, wR2 = 0.1314                                     |                                           |
| R indices (all data)              | R1 = 0.0536, wR2 = 0.1386                                     |                                           |
| Absolute structure parameter      | 0.20(13)                                                      |                                           |
| Extinction coefficient            | 0.136(11)                                                     |                                           |

Largest diff. peak and hole

0.168 and -0.139 e.Å<sup>-3</sup>

**Crystal data and structure refinement for compound 3aa:** (CCDC 2096228, Ellipsoid Probability 50%)

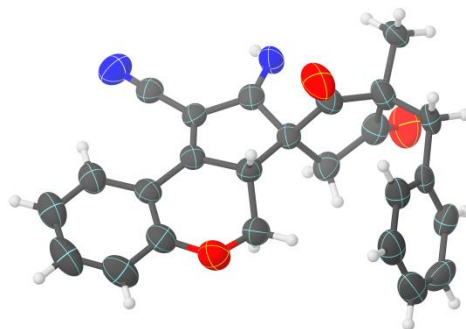

|                                     |                                                                                                |
|-------------------------------------|------------------------------------------------------------------------------------------------|
| Identification code                 | Compound <b>3aa</b>                                                                            |
| Chemical formula                    | C <sub>25</sub> H <sub>20</sub> N <sub>2</sub> O <sub>3</sub>                                  |
| Formula weight                      | 396.43 g/mol                                                                                   |
| Temperature                         | 296(2) K                                                                                       |
| Wavelength                          | 0.71073 Å                                                                                      |
| Crystal size                        | 0.190 x 0.220 x 0.250 mm                                                                       |
| Crystal habit                       | clear light colourless Rectangular                                                             |
| Crystal system                      | monoclinic                                                                                     |
| Space group                         | P 1 21 1                                                                                       |
| Unit cell dimensions                | a = 9.5635(6) Å    α = 90°<br>b = 6.7073(3) Å    β = 90.829(3)°<br>c = 15.8118(8) Å    γ = 90° |
| Volume                              | 1014.15(9) Å <sup>3</sup>                                                                      |
| Z                                   | 2                                                                                              |
| Density (calculated)                | 1.298 g/cm <sup>3</sup>                                                                        |
| Absorption coefficient              | 0.086 mm <sup>-1</sup>                                                                         |
| F(000)                              | 416                                                                                            |
| Theta range for data collection     | 2.13 to 25.00°                                                                                 |
| Index ranges                        | -11 ≤ h ≤ 11, -7 ≤ k ≤ 7, -18 ≤ l ≤ 18                                                         |
| Reflections collected               | 7813                                                                                           |
| Independent reflections             | 3558 [R(int) = 0.0238]                                                                         |
| Coverage of independent reflections | 99.9%                                                                                          |
| Absorption correction               | multi-scan                                                                                     |
| Max. and min. transmission          | 0.9840 and 0.9790                                                                              |
| Structure solution technique        | direct methods                                                                                 |
| Structure solution program          | SHELXS-97 (Sheldrick 2008)                                                                     |

|                                   |                                                                                                                                |
|-----------------------------------|--------------------------------------------------------------------------------------------------------------------------------|
| Refinement method                 | Full-matrix least-squares on F <sup>2</sup>                                                                                    |
| Refinement program                | SHELXL-2014/7 (Sheldrick, 2014)                                                                                                |
| Function minimized                | $\Sigma w(\text{Fo}^2 - \text{Fc}^2)^2$                                                                                        |
| Data / restraints / parameters    | 3558 / 1 / 277                                                                                                                 |
| Goodness-of-fit on F <sup>2</sup> | 1.039                                                                                                                          |
|                                   | 2715                                                                                                                           |
| Final R indices                   | data; R1 = 0.0397, wR2 = 0.0798<br>I > 2 $\sigma$ (I)                                                                          |
|                                   | all data R1 = 0.0598, wR2 = 0.0909                                                                                             |
| Weighting scheme                  | $w = 1 / [\sigma^2(\text{Fo}^2) + (0.0388\text{P})^2 + 0.0483\text{P}]$<br>where $\text{P} = (\text{Fo}^2 + 2\text{Fc}^2) / 3$ |
| Absolute structure parameter      | -0.3(7)                                                                                                                        |
| Extinction coefficient            | 0.0370(40)                                                                                                                     |
| Largest diff. peak and hole       | 0.105 and -0.120 e $\text{\AA}^{-3}$                                                                                           |
| R.M.S. deviation from mean        | 0.028 e $\text{\AA}^{-3}$                                                                                                      |

**Crystal data and structure refinement for compound 3aq:** (CCDC 2096230, Ellipsoid Probability 50%)

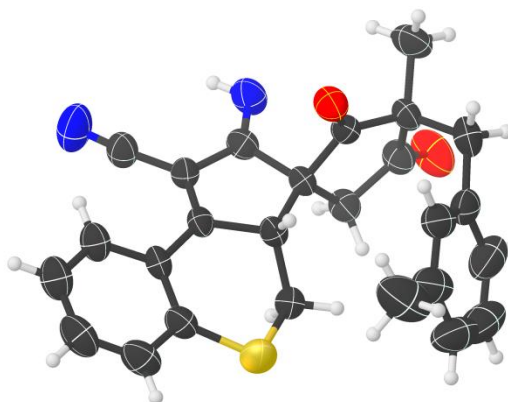

|                        |                                                                                            |                                                                          |
|------------------------|--------------------------------------------------------------------------------------------|--------------------------------------------------------------------------|
| Identification code    | Compound <b>3aq</b>                                                                        |                                                                          |
| Empirical formula      | C <sub>26</sub> H <sub>22</sub> N <sub>2</sub> O <sub>2</sub> S                            |                                                                          |
| Formula weight         | 426.51                                                                                     |                                                                          |
| Temperature            | 296(2) K                                                                                   |                                                                          |
| Wavelength             | 0.71073 $\text{\AA}$                                                                       |                                                                          |
| Crystal system         | Monoclinic                                                                                 |                                                                          |
| Space group            | P 21/c                                                                                     |                                                                          |
| Unit cell dimensions   | a = 11.4340(12) $\text{\AA}$<br>b = 10.0679(10) $\text{\AA}$<br>c = 19.338(2) $\text{\AA}$ | $\alpha = 90^\circ$<br>$\beta = 102.571(6)^\circ$<br>$\gamma = 90^\circ$ |
| Volume                 | 2172.8(4) $\text{\AA}^3$                                                                   |                                                                          |
| Z                      | 4                                                                                          |                                                                          |
| Density (calculated)   | 1.304 Mg/m <sup>3</sup>                                                                    |                                                                          |
| Absorption coefficient | 0.175 mm <sup>-1</sup>                                                                     |                                                                          |



|                                   |                                             |
|-----------------------------------|---------------------------------------------|
| F(000)                            | 896                                         |
| Crystal size                      | 0.300 x 0.250 x 0.200 mm <sup>3</sup>       |
| Theta range for data collection   | 1.825 to 25.899°.                           |
| Index ranges                      | -14<=h<=14, -12<=k<=12, -23<=l<=23          |
| Reflections collected             | 20693                                       |
| Independent reflections           | 4204 [R(int) = 0.0751]                      |
| Completeness to theta = 25.242°   | 100.0 %                                     |
| Absorption correction             | Semi-empirical from equivalents             |
| Max. and min. transmission        | 0.7453 and 0.6243                           |
| Refinement method                 | Full-matrix least-squares on F <sup>2</sup> |
| Data / restraints / parameters    | 4204 / 0 / 287                              |
| Goodness-of-fit on F <sup>2</sup> | 1.020                                       |
| Final R indices [I>2sigma(I)]     | R1 = 0.0525, wR2 = 0.1071                   |
| R indices (all data)              | R1 = 0.1206, wR2 = 0.1400                   |
| Extinction coefficient            | 0.0107(10)                                  |
| Largest diff. peak and hole       | 0.203 and -0.229 e.Å <sup>-3</sup>          |

**Crystal data and structure refinement for compound 11a:** (CCDC 2096231, Ellipsoid Probability 50%)

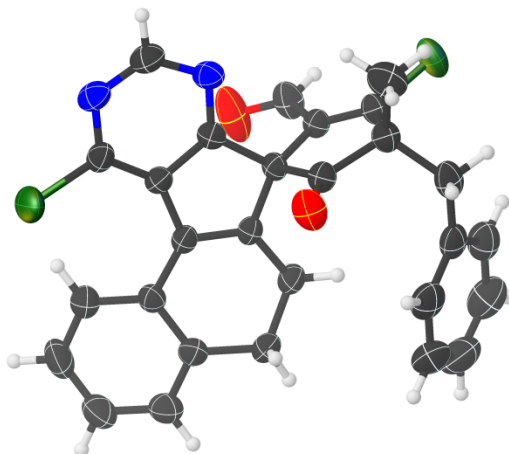

|                      |                                                                               |         |
|----------------------|-------------------------------------------------------------------------------|---------|
| Identification code  | Compound <b>11a</b>                                                           |         |
| Chemical formula     | C <sub>28</sub> H <sub>20</sub> Cl <sub>2</sub> N <sub>2</sub> O <sub>2</sub> |         |
| Formula weight       | 487.36 g/mol                                                                  |         |
| Temperature          | 296(2) K                                                                      |         |
| Wavelength           | 0.71073 Å                                                                     |         |
| Crystal size         | 0.100 x 0.220 x 0.250 mm                                                      |         |
| Crystal habit        | clear light colourless BLock                                                  |         |
| Crystal system       | orthorhombic                                                                  |         |
| Space group          | P c a 21                                                                      |         |
| Unit cell dimensions | a = 12.4644(7) Å                                                              | α = 90° |
|                      | b = 11.8934(6) Å                                                              | β = 90° |

|                                     |                                                                                                           |                     |
|-------------------------------------|-----------------------------------------------------------------------------------------------------------|---------------------|
|                                     | $c = 15.4819(7) \text{ \AA}$                                                                              | $\gamma = 90^\circ$ |
| Volume                              | 2295.1(2) $\text{\AA}^3$                                                                                  |                     |
| Z                                   | 4                                                                                                         |                     |
| Density (calculated)                | 1.410 $\text{g/cm}^3$                                                                                     |                     |
| Absorption coefficient              | 0.313 $\text{mm}^{-1}$                                                                                    |                     |
| F(000)                              | 1008                                                                                                      |                     |
| Theta range for data collection     | 1.71 to 25.00°                                                                                            |                     |
| Index ranges                        | -14 ≤ h ≤ 14, -14 ≤ k ≤ 13, -18 ≤ l ≤ 18                                                                  |                     |
| Reflections collected               | 15384                                                                                                     |                     |
| Independent reflections             | 4038 [R(int) = 0.0509]                                                                                    |                     |
| Coverage of independent reflections | 100.0%                                                                                                    |                     |
| Absorption correction               | multi-scan                                                                                                |                     |
| Max. and min. transmission          | 0.9690 and 0.9260                                                                                         |                     |
| Refinement method                   | Full-matrix least-squares on F <sup>2</sup>                                                               |                     |
| Refinement program                  | SHELXL-2014/7 (Sheldrick, 2014)                                                                           |                     |
| Function minimized                  | $\Sigma w(\text{Fo}^2 - \text{Fc}^2)^2$                                                                   |                     |
| Data / restraints / parameters      | 4038 / 1 / 308                                                                                            |                     |
| Goodness-of-fit on F <sup>2</sup>   | 1.004                                                                                                     |                     |
| Final R indices                     | 3284 data; R1 = 0.0378, wR2 = 0.0835<br>I > 2σ(I)                                                         |                     |
|                                     | all data R1 = 0.0524, wR2 = 0.0920                                                                        |                     |
| Weighting scheme                    | $w = 1/[\sigma^2(\text{Fo}^2) + (0.0470\text{P})^2]$<br>where $\text{P} = (\text{Fo}^2 + 2\text{Fc}^2)/3$ |                     |
| Absolute structure parameter        | 0.1(0)                                                                                                    |                     |
| Largest diff. peak and hole         | 0.152 and -0.181 $\text{e\AA}^{-3}$                                                                       |                     |
| R.M.S. deviation from mean          | 0.041 $\text{e\AA}^{-3}$                                                                                  |                     |

## Computational Details

All the quantum chemical computations were carried out using the B3LYP<sup>3</sup> hybrid functional with the Grimme's dispersion parameter (D3) for dispersion corrections in conjunction with the 6-31G(d) basis set.<sup>4</sup> Standard convergence criteria and an ultrafine integration grid were used. All the thermodynamic data was computed at 298.15 K and 1 atm. All the optimized geometries were verified as minima or first order saddle points by the harmonic vibrational frequency analysis and thermal and zero point energy (ZPE) corrections were also included. As in the standard practice, the presence of one imaginary frequency criteria was used for the characterization of transition states (TS). Further, intrinsic reaction coordinate (IRC) calculations confirmed the nature of the transition states and provided the information that, they were connected to the respective minima (reactant and product). All the calculations were performed using G09RevC.01 suite of program.<sup>5</sup>

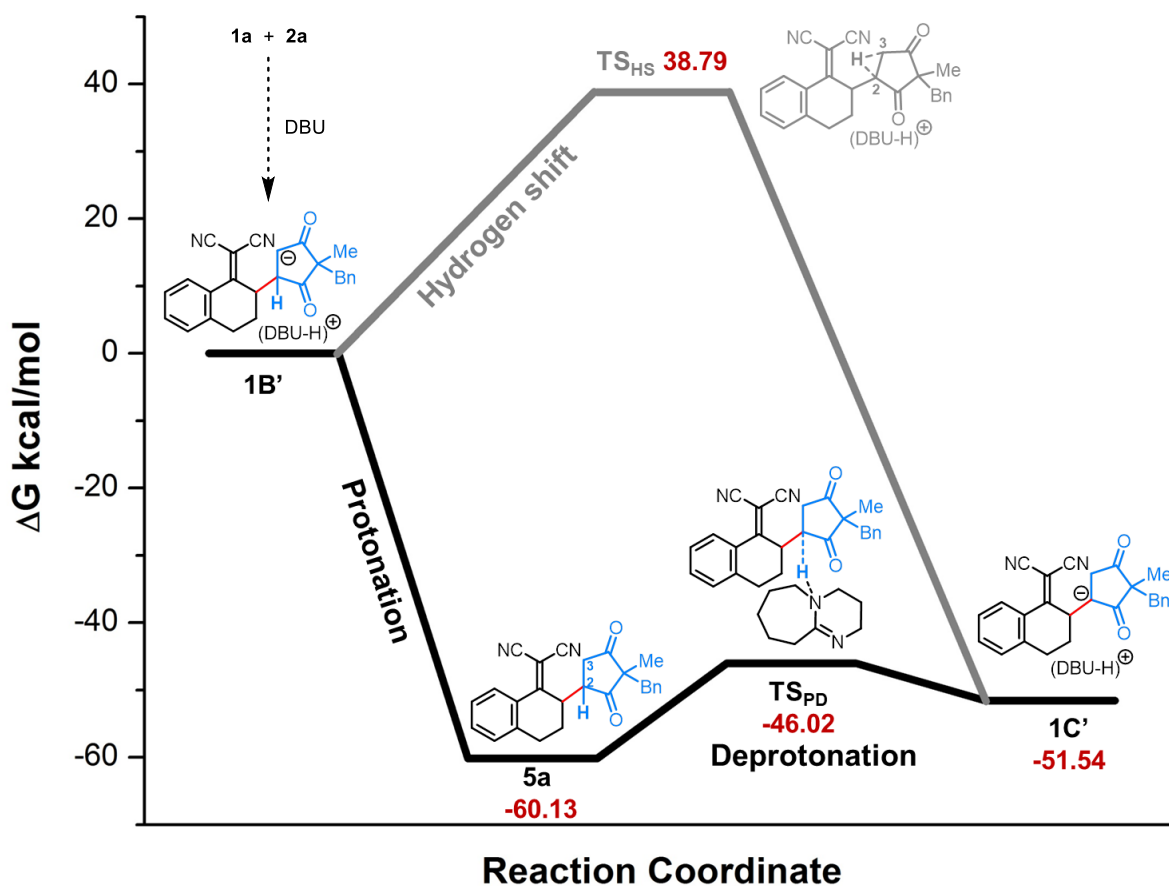

**Scheme S1.** Gibbs free energy reaction profile of direct hydrogen shift and protonation-deprotonation pathways calculated at B3LYP-D3/6-31G(d,p) level of theory.

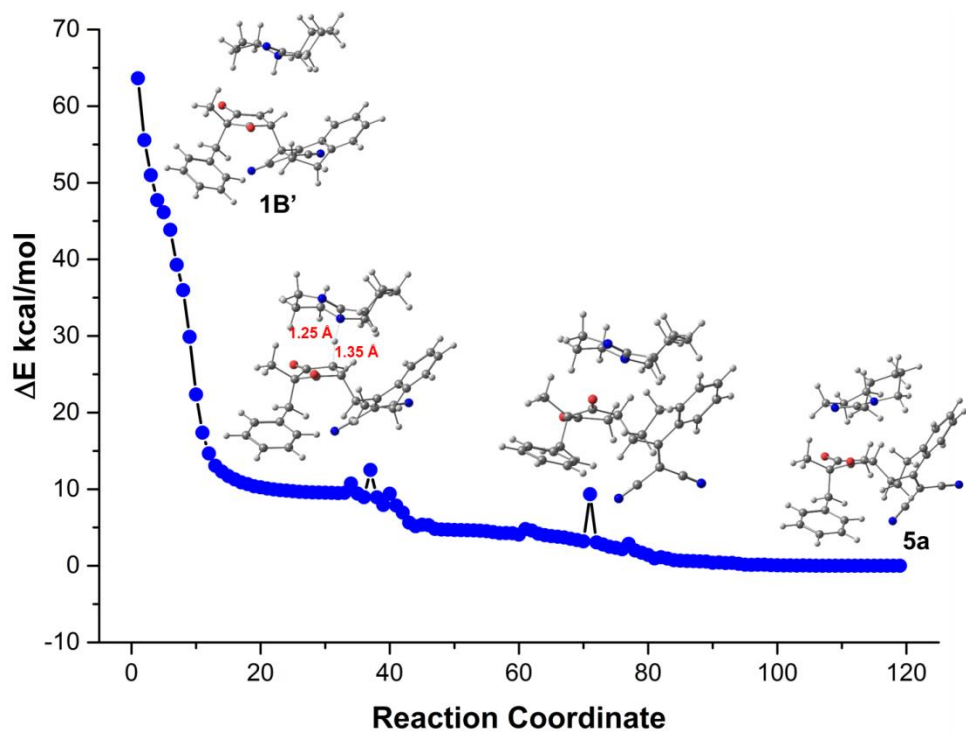

**Figure S1.** Energy profile ( $\Delta E$  vs step size) for geometry relaxation of enolate with acid calculated at B3LYP-D3/6-31G(d,p) level of theory.

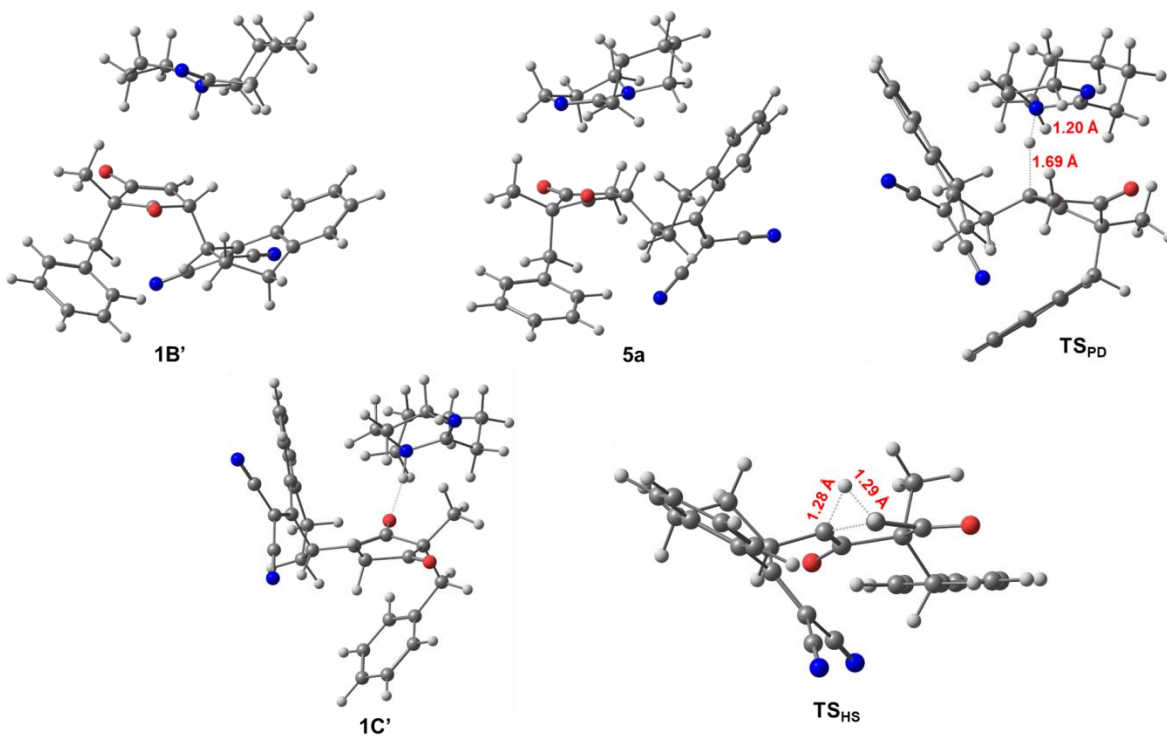

**Figure S2.** Optimized geometries of intermediates involved calculated at B3LYP-D3/6-31G(d,p) level of theory

**Table S2.** Cartesian coordinates of intermediate geometries calculated at B3LYP-D3/6-31G(d,p) level of theory.

| <b>1B'</b> |             |             |             | <b>5a</b> |             |             |             |
|------------|-------------|-------------|-------------|-----------|-------------|-------------|-------------|
| C          | 3.22076700  | 3.81635300  | -1.93499100 | C         | 4.15403100  | 1.83776000  | -1.95026400 |
| C          | 1.91390200  | 3.82578200  | -2.42862600 | C         | 2.88691300  | 1.66212600  | -2.50160000 |
| C          | 0.84518600  | 3.45686800  | -1.61309700 | C         | 1.72625500  | 1.88579600  | -1.75344200 |
| C          | 1.09844600  | 3.07969300  | -0.27479000 | C         | 1.85082900  | 2.31700500  | -0.40609100 |
| C          | 2.41338800  | 3.07262300  | 0.21688200  | C         | 3.14121900  | 2.46507100  | 0.14569900  |
| C          | 3.47074200  | 3.43750100  | -0.61323700 | C         | 4.27973200  | 2.23346400  | -0.61562400 |
| H          | 4.04443500  | 4.10219200  | -2.58257800 | H         | 5.03819500  | 1.65633700  | -2.55397000 |
| H          | 1.71897500  | 4.12272900  | -3.45548000 | H         | 2.78475300  | 1.34239800  | -3.53517800 |
| H          | 2.60541900  | 2.76966300  | 1.23983900  | H         | 3.25483800  | 2.73862200  | 1.18620000  |
| H          | 4.48646700  | 3.42356000  | -0.23081100 | H         | 5.26035500  | 2.35185800  | -0.16616700 |
| C          | -0.06510900 | 2.66779800  | 0.51988900  | C         | 0.63208300  | 2.53046100  | 0.39419300  |
| C          | -0.58851800 | 3.46022100  | -2.07750700 | C         | 0.38301600  | 1.62627900  | -2.40019600 |
| H          | -1.11736200 | 4.30272900  | -1.61047300 | H         | 0.36242400  | 2.08654400  | -3.39449300 |
| H          | -0.64249500 | 3.60587100  | -3.16085500 | H         | 0.26732200  | 0.54587600  | -2.55398900 |
| C          | -1.05328900 | 1.76790000  | -0.18451700 | C         | -0.58861300 | 1.76480500  | -0.07188200 |
| H          | -2.00632000 | 1.80110000  | 0.34967200  | H         | -1.46748200 | 2.08886000  | 0.49014200  |
| C          | -1.27254000 | 2.13997600  | -1.68058400 | C         | -0.79987600 | 2.10531200  | -1.56072500 |
| H          | -2.34624000 | 2.19645600  | -1.87916800 | H         | -0.91605600 | 3.19286200  | -1.64420900 |
| H          | -0.88867200 | 1.33270300  | -2.30925000 | H         | -1.71864300 | 1.63688900  | -1.91704800 |
| C          | -0.24753300 | 3.00491900  | 1.83551000  | C         | 0.53750100  | 3.36234100  | 1.48247100  |
| C          | 0.66437700  | 3.82610100  | 2.57556700  | C         | 1.56893500  | 4.24093700  | 1.94769300  |
| C          | -1.40615700 | 2.57109700  | 2.56194500  | C         | -0.67693300 | 3.42720800  | 2.24448300  |
| N          | 1.39713500  | 4.48111700  | 3.19856000  | N         | 2.38189400  | 4.97135300  | 2.34748700  |
| N          | -2.36061200 | 2.23290500  | 3.13569200  | N         | -1.66567900 | 3.44659500  | 2.85879300  |
| C          | -0.49628200 | 0.30066700  | -0.05757700 | C         | -0.36071700 | 0.25614100  | 0.21395000  |
| C          | -1.57513400 | -0.69368000 | -0.53025700 | C         | -1.45478000 | -0.64145500 | -0.38437400 |
| C          | -0.22256900 | -0.18545900 | 1.33660500  | C         | -0.30649600 | -0.09879100 | 1.71045900  |
| C          | -2.15629000 | -1.43185500 | 0.68263900  | C         | -2.26242600 | -1.29659000 | 0.72053800  |
| C          | -1.09293000 | -1.13811000 | 1.71246000  | C         | -1.32002600 | -1.22624800 | 1.91876800  |
| O          | -1.88798000 | -0.88011200 | -1.68461100 | O         | -1.62253000 | -0.80461400 | -1.57579800 |
| O          | -1.11692100 | -1.83125900 | 2.86719000  | O         | -1.40411600 | -1.91309500 | 2.91423200  |
| C          | -2.32283000 | -2.92623900 | 0.38492200  | C         | -2.74198700 | -2.70052500 | 0.37706100  |
| H          | -2.73042700 | -3.43169800 | 1.26634500  | H         | -3.27848200 | -3.12183600 | 1.23302300  |
| H          | -3.00667700 | -3.05468000 | -0.45744600 | H         | -3.40239400 | -2.66303700 | -0.49223100 |
| H          | -1.35676100 | -3.37838500 | 0.13772500  | H         | -1.87630400 | -3.32837700 | 0.14651800  |
| C          | -3.50805300 | -0.78074500 | 1.13956400  | C         | -3.44897100 | -0.32623100 | 1.10876700  |
| H          | -3.84396600 | -1.35739900 | 2.00878700  | H         | -3.96580900 | -0.81889800 | 1.93958200  |
| H          | -3.30388200 | 0.23547400  | 1.49345600  | H         | -3.03875900 | 0.61451000  | 1.49618000  |
| H          | 0.58401800  | 0.18703500  | 1.95690100  | H         | -0.59631400 | 0.73912600  | 2.35582000  |
| H          | 0.37396400  | 0.23818600  | -0.72512900 | H         | 0.57405800  | -0.03368700 | -0.26386700 |
| C          | -4.57506700 | -0.75407100 | 0.07566900  | C         | -4.39942700 | -0.02927200 | -0.02171800 |
| C          | -5.43300500 | -1.84351500 | -0.11933400 | C         | -5.42546500 | -0.92176100 | -0.35682600 |
| C          | -4.71267100 | 0.36379200  | -0.75659300 | C         | -4.26125500 | 1.14739600  | -0.76790400 |
| C          | -6.39777600 | -1.82124900 | -1.12783600 | C         | -6.28202500 | -0.65155300 | -1.42499600 |
| H          | -5.34078300 | -2.71172300 | 0.52741600  | H         | -5.55097600 | -1.82867900 | 0.22711500  |
| C          | -5.67672200 | 0.39400000  | -1.76383400 | C         | -5.11599800 | 1.42352100  | -1.83529300 |
| H          | -4.05801300 | 1.21880500  | -0.60616600 | H         | -3.48449100 | 1.85757100  | -0.49849800 |
| C          | -6.52127100 | -0.70220400 | -1.95441300 | C         | -6.12711000 | 0.52003900  | -2.16985200 |
| H          | -7.05613300 | -2.67454300 | -1.26482200 | H         | -7.07366700 | -1.35296800 | -1.67226900 |
| H          | -5.77042400 | 1.27110100  | -2.39803600 | H         | -4.99698600 | 2.34377000  | -2.40005500 |
| H          | -7.27355700 | -0.68226600 | -2.73764200 | H         | -6.79518000 | 0.73129500  | -2.99963100 |
| C          | 5.24429000  | -1.64886000 | 0.72845600  | C         | 4.39058500  | -1.86943800 | -0.91407400 |
| C          | 5.75657000  | -1.26454900 | -0.66613100 | C         | 3.79547700  | -2.10639800 | -2.30837200 |
| C          | 4.99675900  | -1.90810900 | -1.83186000 | C         | 2.46722600  | -2.87490800 | -2.32923000 |
| C          | 3.79225800  | -1.20704900 | 0.98449900  | C         | 3.45113100  | -1.08506300 | 0.01817000  |
| C          | 3.48171000  | -1.61038500 | -1.83323700 | C         | 1.33392700  | -2.18058800 | -1.54021600 |

|             |             |             |             |            |             |             |             |
|-------------|-------------|-------------|-------------|------------|-------------|-------------|-------------|
| C           | 2.72841900  | -2.49469700 | -0.86064600 | C          | 1.41481800  | -2.50528100 | -0.06059200 |
| H           | 5.32041200  | -2.73397600 | 0.87948900  | H          | 4.64859500  | -2.82477400 | -0.43753300 |
| H           | 5.68730300  | -0.17108300 | -0.76414800 | H          | 3.63190500  | -1.12441200 | -2.77475400 |
| H           | 5.14131400  | -2.99614300 | -1.82560000 | H          | 2.60496200  | -3.89091700 | -1.93746500 |
| H           | 3.31099000  | -0.55033100 | -1.62397100 | H          | 1.38978100  | -1.10460600 | -1.73651000 |
| H           | 3.61721200  | -0.23155100 | 0.51705400  | H          | 2.97395200  | -0.27597100 | -0.54029600 |
| H           | 5.88776800  | -1.17933300 | 1.48229100  | H          | 5.32486800  | -1.30415200 | -1.02308700 |
| H           | 6.82035800  | -1.51988100 | -0.74345600 | H          | 4.52871700  | -2.63506900 | -2.93000700 |
| H           | 5.42366900  | -1.53829700 | -2.77157800 | H          | 2.14602800  | -2.98063600 | -3.37216500 |
| H           | 3.62031800  | -1.07907200 | 2.05787800  | H          | 4.02778100  | -0.60945500 | 0.81709600  |
| H           | 3.06390100  | -1.82809700 | -2.81799600 | H          | 0.35943800  | -2.53010700 | -1.88041000 |
| C           | 2.54076300  | -3.28805300 | 1.42856100  | C          | 2.83377600  | -2.54757800 | 1.92302800  |
| C           | 1.46703900  | -4.48679200 | -0.48049600 | C          | 0.73169300  | -3.90301600 | 1.74490500  |
| C           | 1.30390600  | -4.06629400 | 0.98726000  | C          | 1.61254200  | -3.06396300 | 2.68002800  |
| H           | 3.42566700  | -3.94345500 | 1.42925400  | H          | 3.52535200  | -3.37847400 | 1.70714700  |
| H           | 2.41744900  | -2.88976300 | 2.44098700  | H          | 3.38222400  | -1.81369200 | 2.52413600  |
| H           | 0.48440400  | -4.69779000 | -0.91926400 | H          | -0.26535500 | -4.00794300 | 2.18414500  |
| H           | 2.03966800  | -5.42282300 | -0.54595300 | H          | 1.14520000  | -4.91803400 | 1.65052400  |
| H           | 0.42379800  | -3.42803900 | 1.09334000  | H          | 1.03036800  | -2.22636700 | 3.07035700  |
| H           | 1.16879700  | -4.94422600 | 1.62856800  | H          | 1.93740000  | -3.66220800 | 3.53858500  |
| N           | 2.75782800  | -2.14553900 | 0.51719800  | N          | 2.42456600  | -1.89553900 | 0.67472600  |
| N           | 2.13534400  | -3.51981000 | -1.34409300 | N          | 0.57860800  | -3.37685600 | 0.38940100  |
| H           | 1.91809100  | -1.61304900 | 0.62348600  | H          | 0.68831700  | -0.43144200 | 2.01526400  |
| <b>TSPD</b> |             |             |             | <b>1C'</b> |             |             |             |
| C           | 3.05755400  | 3.14510600  | -2.36220300 | C          | 2.42466600  | 3.68641400  | -1.52367600 |
| C           | 2.01462600  | 2.32463000  | -2.78494700 | C          | 1.66760100  | 2.77956900  | -2.26049800 |
| C           | 0.91627000  | 2.04159900  | -1.96249400 | C          | 0.43016800  | 2.30127600  | -1.80338100 |
| C           | 0.86340200  | 2.61619900  | -0.66267500 | C          | -0.09002700 | 2.80038000  | -0.57767700 |
| C           | 1.93362400  | 3.44091300  | -0.24910100 | C          | 0.71587000  | 3.68100700  | 0.17924200  |
| C           | 3.01469500  | 3.70392100  | -1.08136800 | C          | 1.95339400  | 4.11810300  | -0.28021900 |
| H           | 3.89410400  | 3.34915800  | -3.02414400 | H          | 3.37591600  | 4.04421300  | -1.90742900 |
| H           | 2.03491800  | 1.89242600  | -3.78238400 | H          | 2.03347800  | 2.42107400  | -3.22008600 |
| H           | 1.94214900  | 3.85782700  | 0.74717900  | H          | 0.37623000  | 4.02548300  | 1.14544500  |
| H           | 3.82171300  | 4.33816800  | -0.72839600 | H          | 2.53950900  | 4.80136300  | 0.32651000  |
| C           | -0.29475000 | 2.32194000  | 0.20186200  | C          | -1.45774800 | 2.41991400  | -0.16593400 |
| C           | -0.16075600 | 1.12462000  | -2.48974600 | C          | -0.24724400 | 1.21297400  | -2.59369500 |
| H           | -0.34599900 | 1.35994100  | -3.54471900 | H          | -0.11457600 | 1.39960100  | -3.66645700 |
| H           | 0.18792400  | 0.08616500  | -2.45409200 | H          | 0.26573500  | 0.27917600  | -2.33061400 |
| C           | -1.14072600 | 1.12123800  | -0.17087000 | C          | -2.02443300 | 1.14162300  | -0.74911000 |
| H           | -2.10776200 | 1.22968900  | 0.32758500  | H          | -3.11578500 | 1.18768700  | -0.67907200 |
| C           | -1.44435900 | 1.18675600  | -1.67505600 | C          | -1.72127500 | 1.03022600  | -2.25105000 |
| H           | -1.97693700 | 2.12586200  | -1.87022100 | H          | -2.31397900 | 1.80496500  | -2.75463800 |
| H           | -2.10678600 | 0.36420400  | -1.94512900 | H          | -2.07702200 | 0.05849500  | -2.60190500 |
| C           | -0.68330800 | 3.07891000  | 1.28639500  | C          | -2.25268700 | 3.16807400  | 0.68244900  |
| C           | -0.05979800 | 4.27558100  | 1.76617200  | C          | -1.88665800 | 4.38620800  | 1.33760400  |
| C           | -1.86002800 | 2.73787200  | 2.03650900  | C          | -3.61537300 | 2.79825300  | 0.93685000  |
| N           | 0.41275300  | 5.25033200  | 2.19362900  | N          | -1.63185000 | 5.38174800  | 1.88680500  |
| N           | -2.81186800 | 2.47586000  | 2.65409900  | N          | -4.72681800 | 2.51955600  | 1.14545700  |
| C           | -0.51499300 | -0.18950200 | 0.35014200  | C          | -1.60928400 | 0.01758400  | 0.18399300  |
| C           | -0.98369200 | -1.42835100 | -0.25573000 | C          | -0.60605700 | -0.91769200 | 0.09736500  |
| C           | -0.61933000 | -0.36933400 | 1.87791700  | C          | -2.53468900 | -0.25565700 | 1.34979800  |
| C           | -1.60544800 | -2.34767400 | 0.82816300  | C          | -0.85349100 | -2.05468700 | 1.10089500  |
| C           | -0.82988500 | -1.87404900 | 2.04722100  | C          | -1.97357600 | -1.51553900 | 1.98509800  |
| O           | -0.90024600 | -1.78848500 | -1.44048700 | O          | 0.39130800  | -1.03522400 | -0.73236600 |
| C           | -0.40297600 | -2.57178400 | 2.94403100  | O          | -2.34304800 | -2.02857300 | 3.02284000  |
| C           | -1.53705900 | -3.84243700 | 0.54339900  | C          | 0.36049400  | -2.47775000 | 1.92658600  |
| H           | -2.09802400 | -4.39699800 | 1.30170700  | H          | 0.07040200  | -3.26591200 | 2.62786900  |
| H           | -1.96195100 | -4.04589400 | -0.44435500 | H          | 1.14480200  | -2.85901100 | 1.26543200  |
| H           | -0.51083200 | -4.21120900 | 0.55921200  | H          | 0.76521800  | -1.64605900 | 2.51020300  |
| C           | -3.11427700 | -1.89432900 | 1.06921700  | C          | -1.36763000 | -3.30898400 | 0.32287200  |

|                        |             |             |             |   |             |             |             |
|------------------------|-------------|-------------|-------------|---|-------------|-------------|-------------|
| H                      | -3.67233300 | -2.81101200 | 1.29098200  | H | -0.54116900 | -3.63487600 | -0.31909000 |
| H                      | -3.17521500 | -1.27738600 | 1.97171400  | H | -1.56645300 | -4.09381300 | 1.06184300  |
| H                      | -1.48849600 | 0.15148100  | 2.30809500  | H | -3.57417600 | -0.43951200 | 1.03620300  |
| C                      | -3.79730600 | -1.13946400 | -0.04961500 | C | -2.59835000 | -3.05155600 | -0.50978400 |
| C                      | -3.92089900 | -1.68925400 | -1.33328100 | C | -2.47806600 | -2.55288300 | -1.81348500 |
| C                      | -4.33239500 | 0.13235600  | 0.19138800  | C | -3.87761000 | -3.23864100 | 0.02721600  |
| C                      | -4.55545700 | -0.97926400 | -2.35209000 | C | -3.61312500 | -2.25667100 | -2.56877000 |
| H                      | -3.49018700 | -2.66301100 | -1.53900400 | H | -1.48300200 | -2.37469300 | -2.21212900 |
| C                      | -4.96647800 | 0.84755900  | -0.82769700 | C | -5.01637400 | -2.93815900 | -0.72413500 |
| H                      | -4.23779100 | 0.57387300  | 1.18069700  | H | -3.97478700 | -3.60516000 | 1.04570800  |
| C                      | -5.07959000 | 0.29294000  | -2.10340500 | C | -4.88690700 | -2.44762400 | -2.02516200 |
| H                      | -4.63651500 | -1.41704900 | -3.34304900 | H | -3.50550300 | -1.87157600 | -3.57942100 |
| H                      | -5.36886500 | 1.83514100  | -0.62091800 | H | -6.00247800 | -3.08460600 | -0.29269700 |
| H                      | -5.57142500 | 0.84588500  | -2.89872100 | H | -5.77136300 | -2.21436500 | -2.61105300 |
| H                      | 0.25274700  | -0.05220000 | 2.46104800  | H | -2.58798300 | 0.55216700  | 2.09517900  |
| C                      | 3.58619300  | -2.01836200 | -1.82138100 | C | 4.81277100  | -0.46834100 | -1.44945400 |
| C                      | 3.37037800  | -3.52907500 | -1.65439700 | C | 5.46878900  | -1.85705200 | -1.44852300 |
| C                      | 3.10685700  | -3.97567000 | -0.21324700 | C | 5.33362600  | -2.62670500 | -0.13100600 |
| C                      | 2.33702600  | -1.17809500 | -1.52652100 | C | 3.28462800  | -0.52034600 | -1.37855500 |
| C                      | 1.93493800  | -3.22726400 | 0.45733700  | C | 3.88441500  | -2.75216000 | 0.38870200  |
| C                      | 2.31709500  | -1.84973500 | 0.92007000  | C | 3.37402800  | -1.46781300 | 0.98655300  |
| H                      | 4.42591200  | -1.68066500 | -1.19954200 | H | 5.20508300  | 0.14525300  | -0.62732300 |
| H                      | 2.51530800  | -3.82126300 | -2.27884600 | H | 5.01661100  | -2.44649400 | -2.25793000 |
| H                      | 4.00655300  | -3.84057300 | 0.40022900  | H | 5.93294300  | -2.14498500 | 0.65145200  |
| H                      | 1.09136400  | -3.16465100 | -0.23658800 | H | 3.21252500  | -3.08693200 | -0.41087800 |
| H                      | 1.41840000  | -1.69952600 | -1.79984300 | H | 2.88658100  | -1.41232800 | -1.86639900 |
| H                      | 3.87352800  | -1.81620400 | -2.85938000 | H | 5.08068100  | 0.05060400  | -2.37601800 |
| H                      | 4.24590900  | -4.06144000 | -2.04411700 | H | 6.53223900  | -1.75252000 | -1.69160600 |
| H                      | 2.87709900  | -5.04686800 | -0.21067500 | H | 5.73882500  | -3.63542800 | -0.26656700 |
| H                      | 2.36189800  | -0.23934600 | -2.08146500 | H | 2.82193000  | 0.34635800  | -1.85383800 |
| H                      | 1.60380900  | -3.75913000 | 1.35068700  | H | 3.85025500  | -3.49142500 | 1.19122100  |
| C                      | 3.11906700  | 0.36717900  | 0.24433800  | C | 2.65091200  | 0.87741900  | 0.56642000  |
| C                      | 3.01489700  | -0.32164700 | 2.62759900  | C | 2.93853700  | -0.03397500 | 2.85689900  |
| C                      | 2.80693800  | 0.84630600  | 1.65106600  | C | 2.05265200  | 0.83286400  | 1.95863100  |
| H                      | 4.14096400  | -0.02076500 | 0.17698800  | H | 3.66489500  | 1.28719800  | 0.56393100  |
| H                      | 2.98336000  | 1.14116000  | -0.50531400 | H | 2.02941200  | 1.43414000  | -0.12391200 |
| H                      | 2.41151100  | -0.18601000 | 3.53243400  | H | 2.39331700  | -0.36548000 | 3.74714300  |
| H                      | 4.06067400  | -0.36686200 | 2.95816500  | H | 3.80289000  | 0.53811600  | 3.21946000  |
| H                      | 1.77318000  | 1.20145600  | 1.67834100  | H | 1.03635300  | 0.42974300  | 1.88472400  |
| H                      | 3.45346800  | 1.69051000  | 1.90880300  | H | 1.97447300  | 1.85140000  | 2.34911700  |
| N                      | 2.18490100  | -0.75405800 | -0.08878000 | N | 2.72401000  | -0.51925600 | 0.02279400  |
| N                      | 2.68755600  | -1.64082100 | 2.10772900  | N | 3.47026000  | -1.23552200 | 2.22066400  |
| H                      | 1.12685300  | -0.41462000 | 0.02411100  | H | 1.79099300  | -0.80508900 | -0.12457400 |
| <b>TS<sub>HS</sub></b> |             |             |             |   |             |             |             |
| C                      | 6.45673000  | -0.85348100 | 0.68759800  |   |             |             |             |
| C                      | 5.57521400  | -1.83133500 | 0.22211000  |   |             |             |             |
| C                      | 4.27362300  | -1.50747200 | -0.15782600 |   |             |             |             |
| C                      | 3.82522200  | -0.15999500 | -0.07899900 |   |             |             |             |
| C                      | 4.72157500  | 0.81082300  | 0.41899100  |   |             |             |             |
| C                      | 6.01815000  | 0.46927800  | 0.79135200  |   |             |             |             |
| H                      | 7.46817200  | -1.12304900 | 0.97990900  |   |             |             |             |
| H                      | 5.89449000  | -2.86904000 | 0.15444200  |   |             |             |             |
| H                      | 4.39620300  | 1.83623700  | 0.53307200  |   |             |             |             |
| H                      | 6.68300300  | 1.23838000  | 1.17467800  |   |             |             |             |
| C                      | 2.45687300  | 0.14181500  | -0.51404200 |   |             |             |             |
| C                      | 3.29954500  | -2.56310600 | -0.60831300 |   |             |             |             |
| H                      | 3.14632600  | -2.50732600 | -1.69683700 |   |             |             |             |
| H                      | 3.68893200  | -3.56233900 | -0.38140600 |   |             |             |             |
| C                      | 1.40052200  | -0.93369800 | -0.37215000 |   |             |             |             |
| H                      | 0.95669300  | -1.09112100 | -1.36751100 |   |             |             |             |

|   |             |             |             |
|---|-------------|-------------|-------------|
| C | 1.95835700  | -2.29012900 | 0.08681900  |
| H | 1.20918100  | -3.05529500 | -0.13810300 |
| H | 2.11211000  | -2.27786200 | 1.17304600  |
| C | 2.05377800  | 1.38862900  | -0.99134000 |
| C | 2.91692300  | 2.50162500  | -1.21605100 |
| C | 0.72724300  | 1.60039200  | -1.48222100 |
| N | 3.59649700  | 3.42975500  | -1.41470700 |
| N | -0.32895200 | 1.77565000  | -1.94510800 |
| C | 0.21699700  | -0.48185600 | 0.45170300  |
| C | -1.13513300 | -0.71787200 | 0.02797000  |
| C | 0.21258800  | 0.70456800  | 1.45450500  |
| C | -2.08049100 | 0.13453400  | 0.90252100  |
| C | -1.13851700 | 1.13315200  | 1.65343500  |
| O | -1.48011100 | -1.47661600 | -0.89503500 |
| O | -1.56585500 | 2.07959100  | 2.32773700  |
| C | -2.74165400 | -0.74712300 | 1.97783600  |
| H | -3.33852000 | -0.11248500 | 2.64310900  |
| H | -3.38870800 | -1.49801200 | 1.51477100  |
| H | -1.97954000 | -1.25837200 | 2.57893400  |
| C | -3.12640700 | 0.94122200  | 0.08538600  |
| H | -3.31516000 | 1.85316400  | 0.66339300  |
| H | -2.65480100 | 1.24001900  | -0.85762700 |
| H | 0.26471200  | -0.55880100 | 1.73282800  |
| H | 1.10616400  | 1.24350700  | 1.73903600  |
| C | -4.45192400 | 0.26340900  | -0.18953000 |
| C | -5.63701100 | 0.82292200  | 0.30641400  |
| C | -4.53700500 | -0.92161600 | -0.93898300 |
| C | -6.87837900 | 0.22994400  | 0.05912800  |
| H | -5.57876400 | 1.73619400  | 0.89417600  |
| C | -5.77504600 | -1.51689000 | -1.18481400 |
| H | -3.61185100 | -1.36881600 | -1.29170200 |
| C | -6.95221500 | -0.94491400 | -0.69062800 |
| H | -7.78418300 | 0.68467600  | 0.45414900  |
| H | -5.82216300 | -2.43581200 | -1.76519100 |
| H | -7.91475200 | -1.41245200 | -0.88529700 |

References:

3. C. Lee, W. Yang and R. G. Parr, *Phys. Rev. B* 1988, **37**, 785-789.
4. a) W. J. Hehre, L. Radom, P. R. Schleyer and J. A. Pople, *Ab Initio Molecular Orbital theory*; Wiley: New York, 1986; b) P. C. Hariharan and J. A. Pople, *Theor. Chim. Acta* 1973, **28**, 213-222.
5. M. J. Frisch, *et. al*, Gaussian 09, Revision C.01, Gaussian, Inc., Wallingford, CT, USA, 2010.



## Spectroscopic Data of Synthesized Compounds

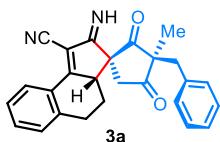

Compound **3a** was prepared by general procedure for synthesis of [4,4]-carbospirocycles described above using **1a** (0.22 mmol, 42 mg) and purified by silica gel column chromatography (5→15% EtOAc: hexane) to provide pure compound as white solid (73 mg, 84%), melting point = 119 - 121 °C. **<sup>1</sup>H NMR** (400 MHz, CDCl<sub>3</sub>) δ 9.30 (bs, 1H), 8.26 (d, *J* = 7.9 Hz, 1H), 7.46 (t, *J* = 7.5 Hz, 1H), 7.34 (t, *J* = 7.5 Hz, 1H), 7.32 – 7.27 (m, 3H), 7.22 (d, *J* = 7.7 Hz, 1H), 7.07 – 7.05 (m, 2H), 3.24 (dd, *J* = 14.1, 4.3 Hz, 1H), 3.07 – 2.97 (m, 2H), 2.87 – 2.76 (m, 2H), 2.70 (d, *J* = 18.3 Hz, 1H), 1.93 (d, *J* = 18.3 Hz, 1H), 1.50 (s, 3H), 1.18 – 1.07 (m, 1H), 0.69 – 0.63 (m, 1H); **<sup>13</sup>C NMR** (100 MHz, CDCl<sub>3</sub>) δ 216.6, 214.7, 182.1, 171.5, 140.7, 136.4, 133.5, 130.2, 129.8, 128.8, 128.1, 127.9, 127.5, 127.3, 113.9, 103.2, 62.8, 59.2, 47.7, 44.3, 29.8, 25.7, 21.6. **IR**: 3240, 2921, 2855, 2212, 1755, 1725, 1634, 1590, 1457, 1335, 757 cm<sup>-1</sup>. **HRMS** (TOF MS ES<sup>+</sup>) calcd. for [C<sub>26</sub>H<sub>22</sub>N<sub>2</sub>O<sub>2</sub>+H]<sup>+</sup> [M + H<sup>+</sup>] m/z 395.1754, found 395.1750.

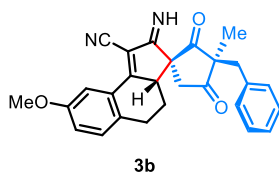

Compound **3b** was prepared by general procedure for synthesis of [4,4]-carbospirocycles described above using **1b** (0.22 mmol, 49 mg) and purified by silica gel column chromatography (5→15% EtOAc: hexane) to provide pure compound as white solid (73 mg, 78%), melting point = 165-167 °C. **<sup>1</sup>H NMR** (400 MHz, CDCl<sub>3</sub>) δ 9.30 (s, 1H), 7.75 (d, *J* = 2.6 Hz, 1H), 7.27 – 7.25 (m, 3H), 7.11 (d, *J* = 8.6 Hz, 1H), 7.06 – 7.01 (m, 3H), 3.84 (s, 3H), 3.23 – 3.18 (m, 1H), 3.06 – 2.96 (m, 2H), 2.78 – 2.63 (m, 3H), 1.93 (d, *J* = 18.3 Hz, 1H), 1.50 (s, 3H), 1.14 – 1.04 (m, 1H), 0.67 – 0.62 (m, 1H); **<sup>13</sup>C NMR** (100 MHz, CDCl<sub>3</sub>) δ 216.6, 214.6, 182.1, 171.7, 158.3, 136.4, 133.2, 130.7, 130.2, 128.8, 128.6, 127.5, 121.8, 114.0, 110.4, 103.2, 62.9, 59.2, 55.6, 47.7, 45.1, 44.2, 29.1, 26.0, 21.6. **HRMS** (TOF MS ES<sup>+</sup>) calcd. for [C<sub>27</sub>H<sub>24</sub>N<sub>2</sub>O<sub>3</sub>+H]<sup>+</sup> [M + H<sup>+</sup>] m/z 425.1860, found 425.1865.

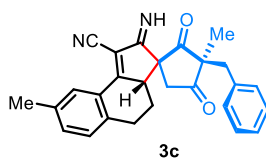

Compound **3c** was prepared by general procedure for synthesis of [4,4]-carbospirocycles described above using **1c** (0.22 mmol, 46 mg) and purified by silica gel column chromatography (5→15% EtOAc: hexane) to provide pure compound as white solid (68 mg, 76%), melting point = 157-159 °C. **<sup>1</sup>H NMR** (400 MHz, CDCl<sub>3</sub>) δ 9.28 (bs, 1H), 8.06 (s, 1H), 7.27 – 7.25 (m, 4H), 7.10 (d, *J* = 7.9 Hz, 1H), 7.06 – 7.04 (m, 2H), 3.21 (dd, *J* = 14.1, 4.3 Hz, 1H), 3.12 – 2.93 (m, 2H), 2.81 – 2.66 (m, 3H), 2.38 (s, 3H), 1.93 (d, *J* = 18.3 Hz, 1H), 1.50 (s, 3H), 1.15 – 1.04 (m, 1H), 0.68 – 0.63 (m, 1H); **<sup>13</sup>C NMR** (100 MHz, CDCl<sub>3</sub>) δ 216.6, 214.7, 182.2, 171.6, 137.9, 137.1, 136.4, 134.6, 130.2, 129.6, 128.8, 128.2, 127.9, 127.5, 113.9, 102.9, 62.9, 59.2, 47.8, 45.2, 44.3, 29.5, 25.9, 21.6, 21.2. **IR**: 3450, 3368, 2925, 2212, 1620, 1585, 1487, 1456, 1270, 1068, 1011, 703 cm<sup>-1</sup>. **HRMS** (TOF MS ES<sup>+</sup>) calcd. for [C<sub>27</sub>H<sub>24</sub>N<sub>2</sub>O<sub>2</sub>+H]<sup>+</sup> [M + H<sup>+</sup>] m/z 409.1911, found 409.1918.

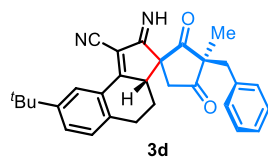

Compound **3d** was prepared by general procedure for synthesis of [4,4]-carbospirocycles described above using **1d** (0.22 mmol, 55 mg) and purified by silica gel column chromatography (5→15% EtOAc: hexane) to provide pure compound as white solid (71 mg, 72%). **<sup>1</sup>H NMR** (400 MHz, CDCl<sub>3</sub>) δ 9.28 (bs, 1H), 8.32 (s, 1H), 7.49 (d, *J* = 8.1 Hz, 1H), 7.27 – 7.25 (m, 3H), 7.17 (s, 1H), 7.06 – 7.05 (m, 2H), 3.24 – 3.19 (m, 1H), 3.02 (q, *J* = 12.7 Hz, 2H), 2.82 – 2.67 (m, 3H), 1.94 (d, *J* = 18.3 Hz, 1H), 1.50 (s, 3H), 1.34 (s, 9H), 1.18 – 1.05 (m, 1H), 0.69 – 0.64 (m, 1H); **<sup>13</sup>C NMR** (100 MHz, CDCl<sub>3</sub>) δ 216.6, 214.7, 182.2, 172.3, 150.5, 137.8, 136.4, 131.1, 130.2, 129.4, 128.8, 127.6, 127.5, 124.9, 114.0, 102.9, 62.9, 59.2, 47.8, 45.1, 44.2, 35.0, 31.2, 29.3, 25.9, 21.6. **IR**: 3271, 2963, 2881, 2222, 1781, 1727, 1632, 1589, 1437, 1365, 1330, 1224, 1011, 875 cm<sup>-1</sup>. **HRMS** (TOF MS ES<sup>+</sup>) calcd. for [C<sub>30</sub>H<sub>30</sub>N<sub>2</sub>O<sub>2</sub>+H]<sup>+</sup> [M + H<sup>+</sup>] *m/z* 451.2380, found 451.2381.

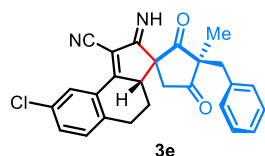

Compound **3e** was prepared by general procedure for synthesis of [4,4]-carbospirocycles described above using **1e** (0.22 mmol, 50 mg) and purified by silica gel column chromatography (5→15% EtOAc: hexane) to provide pure compound as white solid (81 mg, 86%), melting point = 196-198 °C. **<sup>1</sup>H NMR** (500 MHz, CDCl<sub>3</sub>) δ 9.30 (bs, 1H), 8.26 (d, *J* = 7.9 Hz, 1H), 7.46-7.43 (m, 1H), 7.33 (t, *J* = 7.6 Hz, 1H), 7.28-7.25 (m, 2H), 7.22 (d, *J* = 7.8 Hz, 1H), 7.06-7.04 (m, 2H), 3.23 (dd, *J* = 14.1, 4.3 Hz, 1H), 3.05 (d, *J* = 12.8 Hz, 1H), 2.98 (d, *J* = 12.8 Hz, 1H), 2.88 – 2.75 (m, 2H), 2.70 (d, *J* = 18.3 Hz, 1H), 1.94 (d, *J* = 18.3 Hz, 1H), 1.50 (s, 3H), 1.16-1.08 (m, 1H), 0.69 – 0.65 (m, 1H); **<sup>13</sup>C NMR** (125 MHz, CDCl<sub>3</sub>) δ 216.5, 214.6, 182.1, 171.4, 140.7, 136.4, 133.5, 130.2, 129.7, 128.8, 128.1, 128.0, 127.5, 127.3, 113.8, 103.2, 62.8, 59.2, 47.7, 45.1, 44.2, 29.8, 25.7, 21.6. **IR**: 2951, 2905, 2212, 1771, 1724, 1624, 1586, 1452, 1332, 1189, 1021, 861 cm<sup>-1</sup>. **HRMS** (TOF MS ES<sup>+</sup>) calcd. for [C<sub>26</sub>H<sub>21</sub>N<sub>2</sub>O<sub>2</sub>Cl+K]<sup>+</sup> [M + K<sup>+</sup>] *m/z* 467.0923, found 467.0875.

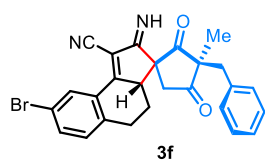

Compound **3f** was prepared by general procedure for synthesis of [4,4]-carbospirocycles described above using **1f** (0.22 mmol, 60 mg) and purified by silica gel column chromatography (5→15% EtOAc: hexane) to provide pure compound as white solid (84 mg, 81%). **<sup>1</sup>H NMR** (400 MHz, CDCl<sub>3</sub>) δ 9.31 (bs, 1H), 8.26 (d, *J* = 7.9 Hz, 1H), 7.45 (t, *J* = 7.6 Hz, 1H), 7.33 (t, *J* = 7.7 Hz, 1H), 7.27 – 7.26 (m, 2H), 7.22 (d, *J* = 7.8 Hz, 1H), 7.07 – 7.04 (m, 2H), 3.23 (dd, *J* = 14.1, 4.3 Hz, 1H), 3.02 (q, *J* = 12.7 Hz, 2H), 2.85 – 2.75 (m, 2H), 2.70 (d, *J* = 18.3 Hz, 1H), 1.94 (d, *J* = 18.3 Hz, 1H), 1.50 (s, 3H), 1.18 – 1.07 (m, 1H), 0.70 – 0.64 (m, 1H); **<sup>13</sup>C NMR** (100 MHz, CDCl<sub>3</sub>) δ 216.5, 214.6, 182.1, 171.4, 140.7, 136.4, 133.5, 130.2, 129.8, 128.8, 128.1, 128.0, 127.5, 127.3, 113.8, 103.2, 62.9, 59.2, 47.7, 45.2, 44.3, 29.9, 25.7, 21.6. **IR**: 3125, 3065, 2212, 1755, 1715, 1630, 1580, 1452, 1335, 1173, 859 cm<sup>-1</sup>. **HRMS** (TOF MS ES<sup>+</sup>) calcd. for [C<sub>26</sub>H<sub>21</sub>N<sub>2</sub>O<sub>2</sub>Br+H]<sup>+</sup> [M + H<sup>+</sup>] *m/z* 475.0839, found 475.0881.

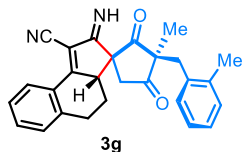

Compound **3g** was prepared by general procedure for synthesis of [4,4]-carbospirocycles described above using **1a** (0.22 mmol, 42 mg) and purified by silica gel column chromatography (5→15% EtOAc: hexane) to provide pure compound as white solid (75 mg, 83%). **<sup>1</sup>H NMR** (500 MHz, CDCl<sub>3</sub>) δ 9.27 (s, 1H), 8.26 (d, *J* = 7.8 Hz, 1H), 7.46 (t, *J* = 7.5 Hz, 1H), 7.34 (t, *J* = 7.6 Hz, 1H), 7.23 (d, *J* = 7.7 Hz, 1H), 7.17 – 7.14 (m, 2H), 7.10 – 7.07 (m, 1H), 6.99 (d, *J* = 7.6 Hz, 1H), 3.29 – 3.26 (m, 1H), 3.13 – 3.06 (m, 2H), 2.88 – 2.81 (m, 2H), 2.66 (d, *J* = 17.8 Hz, 1H), 2.27 (s, 3H), 2.01 (d, *J* = 17.8 Hz, 1H), 1.50 (s, 3H), 1.20 – 1.12 (m, 1H), 0.86 – 0.82 (m, 1H); **<sup>13</sup>C NMR** (125 MHz, CDCl<sub>3</sub>) δ 216.7, 214.6, 182.2, 171.7, 140.7, 137.5, 134.9, 133.5, 131.4, 130.8, 129.8, 128.1, 128.0, 127.7, 127.3, 126.0, 113.8, 103.2, 63.0, 58.6, 47.5, 45.1, 41.1, 29.9, 25.8, 21.7, 19.8. **HRMS** (TOF MS ES+) calcd. for [C<sub>27</sub>H<sub>24</sub>N<sub>2</sub>O<sub>2</sub>+H]<sup>+</sup> [*M* + H<sup>+</sup>] *m/z* 409.1911, found 409.1915.

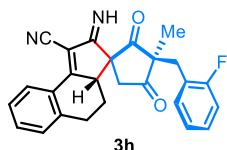

Compound **3h** was prepared by general procedure for synthesis of [4,4]-carbospirocycles described above using **1a** (0.22 mmol, 42 mg) and purified by silica gel column chromatography (5→15% EtOAc: hexane) to provide pure compound as white solid (68 mg, 75%). **<sup>1</sup>H NMR** (400 MHz, CDCl<sub>3</sub>) δ 9.31 (bs, 1H), 8.28 (d, *J* = 7.9 Hz, 1H), 7.47 (t, *J* = 7.5 Hz, 1H), 7.35 (t, *J* = 7.6 Hz, 1H), 7.28 – 7.23 (m, 2H), 7.12 – 7.01 (m, 3H), 3.40 (dd, *J* = 14.1, 4.3 Hz, 1H), 3.05 (s, 2H), 2.91 – 2.86 (m, 2H), 2.74 (d, *J* = 17.9 Hz, 1H), 2.26 (d, *J* = 17.9 Hz, 1H), 1.50 (s, 3H), 1.37 – 1.26 (m, 1H), 1.09 – 1.03 (m, 1H); **<sup>13</sup>C NMR** (100 MHz, CDCl<sub>3</sub>) δ 215.4, 212.9, 182.1, 171.3, 160.9 (d, *J* = 247.9 Hz), 140.7, 133.6, 132.8 (d, *J* = 4.0 Hz), 129.8, 129.6 (d, *J* = 8.1 Hz), 128.2, 128.0, 127.4, 124.4 (d, *J* = 3.7 Hz), 123.2 (d, *J* = 15.8 Hz), 115.8 (d, *J* = 22.3 Hz), 113.8, 103.1, 63.1, 57.5, 47.5, 44.6, 36.8, 29.9, 25.9, 21.0. **<sup>19</sup>F NMR** (461 MHz, CDCl<sub>3</sub>) δ -113.9 ppm. **IR**: 3343, 3073, 2929, 2218, 1759, 1729, 1588, 1509, 1447, 1369, 1223, 1051, 827 cm<sup>-1</sup>. **HRMS** (TOF MS ES+) calcd. for [C<sub>26</sub>H<sub>21</sub>N<sub>2</sub>O<sub>2</sub>F+H]<sup>+</sup> [*M* + H<sup>+</sup>] *m/z* 413.1660, found 413.1663.

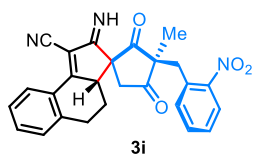

Compound **3i** was prepared by general procedure for synthesis of [4,4]-carbospirocycles described above using **1a** (0.22 mmol, 42 mg) and purified by silica gel column chromatography (5→15% EtOAc: hexane) to provide pure compound as white solid (69 mg, 71%). **<sup>1</sup>H NMR** (400 MHz, CDCl<sub>3</sub>) δ 9.38 (bs, 1H), 8.37 (d, *J* = 8.0 Hz, 1H), 8.13 (d, *J* = 8.2 Hz, 1H), 7.69 (t, *J* = 7.5 Hz, 1H), 7.56 (t, *J* = 7.5 Hz, 2H), 7.46 – 7.42 (m, 2H), 7.38 (d, *J* = 7.7 Hz, 1H), 3.68 – 3.62 (m, 2H), 3.29 – 3.11 (m, 4H), 2.93 (d, *J* = 17.6 Hz, 1H), 2.28 – 2.25 (m, 1H), 1.78 – 1.67 (m, 1H), 1.53 (s, 3H); **<sup>13</sup>C NMR** (100 MHz, CDCl<sub>3</sub>) δ 213.7, 212.5, 182.0, 172.1, 149.1, 141.1, 134.3, 133.6, 133.5, 131.1, 129.9, 128.9, 128.2, 128.1, 127.3, 125.7, 113.9, 102.9, 63.4, 55.4, 47.8, 43.3, 39.6, 30.1, 26.4, 20.4. **IR**: 3250, 2931, 2885, 2217, 1771, 1727, 1639, 1589, 1526, 1437, 1343, 1275, 1023, 864 cm<sup>-1</sup>. **HRMS** (TOF MS ES+) calcd. for [C<sub>26</sub>H<sub>21</sub>N<sub>3</sub>O<sub>4</sub>+Na]<sup>+</sup> [*M* + Na<sup>+</sup>] *m/z* 462.1424, found 462.1424.

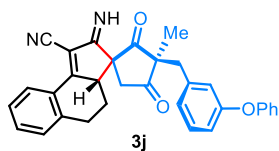

Compound **3j** was prepared by general procedure for synthesis of [4,4]-carbospirocycles described above using **1a** (0.22 mmol, 42 mg) and purified by silica gel column chromatography (5→15% EtOAc: hexane) to provide pure compound as white solid (78 mg, 73%), melting point = 157-159 °C. **<sup>1</sup>H NMR** (500 MHz, CDCl<sub>3</sub>) δ 9.32 (bs, 1H), 8.29 (d, *J* = 8.0 Hz, 1H), 7.48 – 7.45 (m, 1H), 7.37 – 7.31 (m, 3H), 7.28 – 7.25 (m, 1H), 7.22 (t, *J* = 7.9 Hz, 1H), 7.12 (t, *J* = 7.4 Hz, 1H), 6.94 – 6.87 (m, 3H), 6.79 – 6.78 (m, 1H), 6.73 (t, *J* = 2.1 Hz, 1H), 3.37 (dd, *J* = 14.1, 4.3 Hz, 1H), 3.04 (d, *J* = 12.7 Hz, 1H), 2.95 – 2.91 (m, 3H), 2.74 (d, *J* = 18.2 Hz, 1H), 2.00 (d, *J* = 18.2 Hz, 1H), 1.49 (s, 3H), 1.35 – 1.21 (m, 1H), 1.02 – 0.97 (m, 1H); **<sup>13</sup>C NMR** (125 MHz, CDCl<sub>3</sub>) δ 216.3, 214.1, 182.0, 171.3, 157.8, 156.7, 140.8, 138.5, 133.5, 130.1, 130.0, 129.8, 128.2, 128.0, 127.3, 124.9, 123.9, 120.4, 119.0, 117.5, 113.8, 103.2, 63.0, 58.9, 47.7, 45.2, 43.9, 29.9, 25.9, 21.7. **IR**: 3255, 3062, 2936, 2222, 1776, 1727, 1634, 1587, 1485, 1427, 1254, 1138, 798 cm<sup>-1</sup>. **HRMS** (TOF MS ES+) calcd. for [C<sub>32</sub>H<sub>26</sub>N<sub>2</sub>O<sub>3</sub>+H]<sup>+</sup> [M + H<sup>+</sup>] *m/z* 487.2016, found 487.2005.

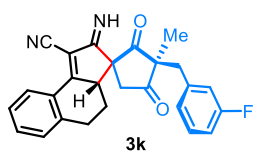

Compound **3k** was prepared by general procedure for synthesis of [4,4]-carbospirocycles described above using **1a** (0.22 mmol, 42 mg) and purified by silica gel column chromatography (5→15% EtOAc: hexane) to provide pure compound as white solid (73 mg, 80%), melting point = 139-141 °C. **<sup>1</sup>H NMR** (500 MHz, CDCl<sub>3</sub>) δ 9.34 (bs, 1H), 8.28 (d, *J* = 8.0 Hz, 1H), 7.46 (t, *J* = 7.5 Hz, 1H), 7.35 (t, *J* = 7.7 Hz, 1H), 7.27 – 7.23 (m, 2H), 7.00 – 6.96 (m, 1H), 6.86 (d, *J* = 7.6 Hz, 1H), 6.79 – 6.76 (m, 1H), 3.32 (dd, *J* = 14.2, 4.3 Hz, 1H), 3.06 (d, *J* = 12.7 Hz, 1H), 2.97 (d, *J* = 12.7 Hz, 1H), 2.92 – 2.80 (m, 2H), 2.75 (d, *J* = 18.3 Hz, 1H), 1.94 (d, *J* = 18.4 Hz, 1H), 1.51 (s, 3H), 1.27 – 1.18 (m, 1H), 0.84 – 0.80 (m, 1H); **<sup>13</sup>C NMR** (125 MHz, CDCl<sub>3</sub>) δ 216.3, 214.1, 181.9, 171.3, 162.9 (d, *J* = 247.6 Hz), 140.7, 139.0 (d, *J* = 7.1 Hz), 133.6, 130.5 (d, *J* = 8.2 Hz), 129.8, 128.2, 127.9, 127.4, 126.0 (d, *J* = 3.2 Hz), 117.0 (d, *J* = 21.0 Hz), 114.5 (d, *J* = 21.0 Hz), 113.8, 103.2, 62.9, 59.0, 47.8, 45.1, 43.5, 29.8, 25.9, 21.7. **<sup>19</sup>F NMR** (471 MHz, CDCl<sub>3</sub>) δ -111.9. **IR**: 3255, 2955, 2926, 2217, 1758, 1727, 1623, 1589, 1451, 1363, 1259, 1153, 869 cm<sup>-1</sup>. **HRMS** (TOF MS ES+) calcd. for [C<sub>26</sub>H<sub>21</sub>N<sub>2</sub>O<sub>2</sub>F+H]<sup>+</sup> [M + H<sup>+</sup>] *m/z* 413.1660, found 413.1648.

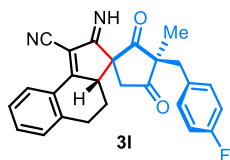

Compound **3l** was prepared by general procedure for synthesis of [4,4]-carbospirocycles described above using **1a** (0.22 mmol, 42 mg) and purified by silica gel column chromatography (5→15% EtOAc: hexane) to provide pure compound as white solid (71 mg, 78%). **<sup>1</sup>H NMR** (400 MHz, CDCl<sub>3</sub>) δ 9.34 (bs, 1H), 8.28 (d, *J* = 8.0 Hz, 1H), 7.47 (t, *J* = 7.6 Hz, 1H), 7.35 (t, *J* = 7.7 Hz, 1H), 7.25 (t, *J* = 8.0 Hz, 1H), 7.06 – 6.95 (m, 4H), 3.24 (d, *J* = 14.0 Hz, 1H), 3.05 – 2.89 (m, 3H), 2.83 – 2.75 (m, 2H), 2.00 (d, *J* = 18.4 Hz, 1H), 1.49 (s, 3H), 1.27 – 1.21 (m, 1H), 0.78 – 0.75 (m, 1H); **<sup>13</sup>C NMR** (100 MHz, CDCl<sub>3</sub>) δ 216.5, 214.5, 181.9, 171.1, 162.2 (d, *J* = 247.3 Hz), 140.6, 133.6, 132.2 (d, *J* = 3.0 Hz), 131.8 (d, *J* = 7.7 Hz), 129.8, 128.1, 127.8, 127.3, 115.6 (d, *J* = 21.2 Hz), 113.8, 103.2, 62.8, 59.2, 47.7, 45.1, 42.9, 29.7, 25.8, 21.6. **<sup>19</sup>F NMR** (471 MHz, CDCl<sub>3</sub>) δ -115.5. **IR**: 2922, 2835, 2222, 1777, 1725, 1620, 1593, 1450, 1346, 1225, 1051, 857 cm<sup>-1</sup>. **HRMS** (TOF MS ES+) calcd. for [C<sub>26</sub>H<sub>21</sub>N<sub>2</sub>O<sub>2</sub>F+H]<sup>+</sup> [M + H<sup>+</sup>] *m/z* 413.1660, found 413.1669.

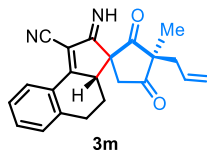

Compound **3m** was prepared by general procedure for synthesis of [4,4]-carbospirocycles described above using **1a** (0.22 mmol, 42 mg) and purified by silica gel column chromatography (5→15% EtOAc : hexane) to provide pure compound as white solid (58 mg, 79%), melting point = 180-182 °C. **<sup>1</sup>H NMR** (400 MHz, CDCl<sub>3</sub>) δ 9.39 (bs, 1H), 8.35 (d, *J* = 8.1 Hz, 1H), 7.49 (t, *J* = 7.5 Hz, 1H), 7.38 (t, *J* = 7.5 Hz, 1H), 7.33 – 7.24 (m, 1H), 5.66 – 5.55 (m, 1H), 5.12 – 5.08 (m, 2H), 3.72 (dd, *J* = 14.1, 4.3 Hz, 1H), 3.13 – 3.09 (m, 2H), 2.93 (d, *J* = 17.9 Hz, 1H), 2.79 (d, *J* = 17.9 Hz, 1H), 2.46 – 2.35 (m, 2H), 2.08 – 2.02 (m, 1H), 1.76 – 1.65 (m, 1H), 1.40 (s, 3H); **<sup>13</sup>C NMR** (100 MHz, CDCl<sub>3</sub>) δ 215.5, 213.3, 181.8, 170.9, 140.8, 133.6, 132.0, 129.9, 128.2, 128.0, 127.5, 120.4, 113.9, 103.2, 63.3, 57.1, 47.5, 44.8, 41.9, 29.9, 26.6, 20.3. **HRMS** (TOF MS ES+) calcd. for [C<sub>22</sub>H<sub>20</sub>N<sub>2</sub>O<sub>2</sub>+Na]<sup>+</sup> [M + Na<sup>+</sup>] *m/z* 367.1417, found 367.1441.

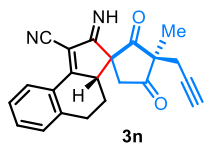

Compound **3n** was prepared by general procedure for synthesis of [4,4]-carbospirocycles described above using **1a** (0.22 mmol, 42 mg) and purified by silica gel column chromatography (5→15% EtOAc: hexane) to provide pure compound as white solid (65 mg, 87%), melting point = 110-112 °C. **<sup>1</sup>H NMR** (400 MHz, CDCl<sub>3</sub>) δ 9.41 (s, 1H), 8.35 (d, *J* = 8.0 Hz, 1H), 7.50 (t, *J* = 7.8 Hz, 1H), 7.38 (t, *J* = 7.8 Hz, 1H), 7.31 – 7.27 (m, 1H), 3.87 – 3.82 (m, 1H), 3.13 – 3.04 (m, 4H), 2.62 – 2.46 (m, 2H), 2.21 – 2.16 (m, 1H), 2.03 2.01 (m, 1H), 1.79 – 1.68 (m, 1H), 1.40 (s, 3H); **<sup>13</sup>C NMR** (100 MHz, CDCl<sub>3</sub>) δ 214.5, 212.2, 181.7, 171.1, 140.8, 133.7, 129.9, 128.2, 128.0, 127.4, 113.9, 103.1, 79.9, 71.0, 63.4, 55.5, 47.6, 45.6, 29.9, 26.9, 26.2, 20.6. **IR**: 3296, 2971, 2850, 2212, 1776, 1727, 1636, 1588, 1452, 1366, 1282, 1087, 732 cm<sup>-1</sup>. **HRMS** (TOF MS ES+) calcd. for [C<sub>22</sub>H<sub>18</sub>N<sub>2</sub>O<sub>2</sub>+H]<sup>+</sup> [M + H<sup>+</sup>] *m/z* 343.1441, found 343.1432.

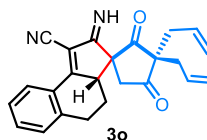

Compound **3o** was prepared by general procedure for synthesis of [4,4]-carbospirocycles described above using **1a** (0.22 mmol, 42 mg) and purified by silica gel column chromatography (5→15% EtOAc: hexane) to provide pure compound as white solid (67 mg, 82%). **<sup>1</sup>H NMR** (400 MHz, CDCl<sub>3</sub>) δ 9.46 (bs, 1H), 8.35 (d, *J* = 6.9 Hz, 1H), 7.51 – 7.47 (m, 1H), 7.40 – 7.36 (m, 1H), 7.29 – 7.27 (m, 1H), 5.87 (dq, *J* = 16.0, 7.3 Hz, 1H), 5.57 (dq, *J* = 17.1, 8.5 Hz, 1H), 5.18 – 5.06 (m, 4H), 3.62 – 3.59 (m, 1H), 3.09 – 3.01 (m, 3H), 2.79 (d, *J* = 19.4 Hz, 1H), 2.70 – 2.58 (m, 2H), 2.50 – 2.40 (m, 2H), 2.02 – 1.97 (m, 1H), 1.74 – 1.63 (m, 1H); **<sup>13</sup>C NMR** (100 MHz, CDCl<sub>3</sub>) δ 214.4, 212.8, 181.5, 170.6, 140.6, 133.6, 132.2, 131.7, 129.9, 128.2, 128.0, 127.5, 120.5, 119.7 (2×C), 113.9, 63.0, 60.6, 48.6, 45.1, 38.9, 38.5, 29.9, 26.7. **HRMS** (TOF MS ES+) calcd. for [C<sub>24</sub>H<sub>22</sub>N<sub>2</sub>O<sub>2</sub>+Na]<sup>+</sup> [M + Na<sup>+</sup>] *m/z* 393.1573, found 393.1571.

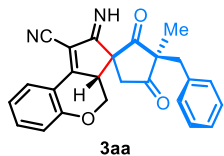

Compound **3aa** was prepared by general procedure for synthesis of [4,4]-carbospirocycles described above using **1aa** (0.22 mmol, 43 mg) and purified by silica gel column chromatography (5→15% EtOAc: hexane) to provide pure compound as yellow solid (66 mg, 76%), melting point = 190-191 °C. <sup>1</sup>H NMR (400 MHz, CDCl<sub>3</sub>) δ 9.32 (s, 1H), 8.09 (dd, *J* = 8.1, 1.6 Hz, 1H), 7.47 – 7.44 (m, 1H), 7.35 – 7.33 (m, 3H), 7.08 – 7.05 (m, 3H), 6.94 (d, *J* = 8.4 Hz, 1H), 3.65 (dd, *J* = 13.8, 5.6 Hz, 1H), 3.40 – 3.34 (m, 1H), 3.10 (d, *J* = 12.7 Hz, 1H), 3.04 (dd, *J* = 10.2, 5.6 Hz, 1H), 2.97 (d, *J* = 12.7 Hz, 1H), 2.58 (d, *J* = 17.8 Hz, 1H), 1.54 – 1.49 (m, 4H); <sup>13</sup>C NMR (100 MHz, CDCl<sub>3</sub>) δ 215.4, 213.5, 181.4, 164.3, 157.2, 136.2, 136.1, 130.1, 129.2, 127.9, 127.8, 122.2, 118.3, 115.8, 113.2, 101.2, 66.4, 60.5, 58.9, 44.9, 44.3, 42.3, 21.4. HRMS (TOF MS ES<sup>+</sup>) calcd. for [C<sub>25</sub>H<sub>20</sub>N<sub>2</sub>O<sub>3</sub>+H]<sup>+</sup> [M + H<sup>+</sup>] *m/z* 397.1547, found 397.1524.

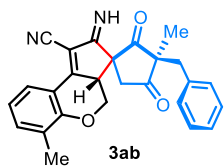

Compound **3ab** was prepared by general procedure for synthesis of [4,4]-carbospirocycles described above using **1ab** (0.22 mmol, 46 mg) and purified by silica gel column chromatography (5→15% EtOAc: hexane) to provide pure compound as yellow solid (67 mg, 74%). <sup>1</sup>H NMR (400 MHz, CDCl<sub>3</sub>) δ 9.29 (s, 1H), 7.95 (d, *J* = 8.0 Hz, 1H), 7.36 – 7.30 (m, 4H), 7.08 – 7.06 (m, 2H), 6.96 (t, *J* = 7.7 Hz, 1H), 3.68 – 3.63 (m, 1H), 3.41 – 3.35 (m, 1H), 3.17 – 3.09 (m, 2H), 2.99 (d, *J* = 12.6 Hz, 1H), 2.58 (d, *J* = 17.7 Hz, 1H), 2.19 (s, 3H), 1.53 – 1.48 (m, 4H); <sup>13</sup>C NMR (125 MHz, CDCl<sub>3</sub>) δ 215.4, 213.6, 181.5, 164.9, 155.5, 137.1, 136.2, 130.0, 129.2, 127.9, 127.7, 125.4, 121.6, 115.3, 113.4, 100.9, 66.5, 60.6, 58.9, 44.9, 44.3, 42.3, 21.5, 16.1. IR: 3261, 2931, 2217, 1766, 1724, 1624, 1588, 1421, 1329, 1218, 1133, 862 cm<sup>-1</sup>. HRMS (TOF MS ES<sup>+</sup>) calcd. for [C<sub>26</sub>H<sub>22</sub>N<sub>2</sub>O<sub>3</sub>+Na]<sup>+</sup> [M + Na<sup>+</sup>] *m/z* 433.1523, found 433.1525.

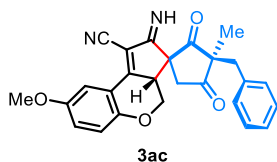

Compound **3ac** was prepared by general procedure for synthesis of [4,4]-carbospirocycles described above using **1ac** (0.22 mmol, 49 mg) and purified by silica gel column chromatography (5→15% EtOAc: hexane) to provide pure compound as yellow solid (72 mg, 77%), melting point = 205-209 °C. <sup>1</sup>H NMR (400 MHz, CDCl<sub>3</sub>) δ 9.31 (s, 1H), 7.53 – 7.52 (m, 1H), 7.35 – 7.33 (m, 3H), 7.08 – 7.05 (m, 3H), 6.87 (d, *J* = 9.1 Hz, 1H), 3.80 (s, 3H), 3.65 – 3.62 (m, 1H), 3.35 – 3.29 (m, 1H), 3.10 (d, *J* = 12.6 Hz, 1H), 3.00 – 2.95 (m, 2H), 2.57 (d, *J* = 17.8 Hz, 1H), 1.52 – 1.48 (m, 4H); <sup>13</sup>C NMR (100 MHz, CDCl<sub>3</sub>) δ 215.5, 213.5, 181.4, 164.5, 154.3, 151.9, 136.2, 130.0, 129.2, 127.9, 125.3, 119.4, 115.5, 113.4, 108.3, 100.9, 66.5, 60.6, 58.9, 55.9, 44.9, 44.3, 42.4, 21.3. IR: 3204, 2943, 2207, 1761, 1725, 1623, 1588, 1491, 1447, 1325, 1031, 854 cm<sup>-1</sup>. HRMS (TOF MS ES<sup>+</sup>) calcd. for [C<sub>26</sub>H<sub>22</sub>N<sub>2</sub>O<sub>4</sub>+H]<sup>+</sup> [M + H<sup>+</sup>] *m/z* 427.1652, found 427.1659.

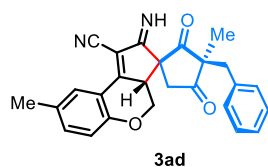

Compound **3ad** was prepared by general procedure for synthesis of [4,4]-carbospirocycles described above using **1ad** (0.22 mmol, 46 mg) and purified by silica gel column chromatography (5→15% EtOAc: hexane) to provide pure compound as yellow solid (71 mg, 79%), melting point = 143-145 °C. **<sup>1</sup>H NMR** (400 MHz, CDCl<sub>3</sub>) δ 9.24 (s, 1H), 7.97 (d, *J* = 8.2 Hz, 1H), 7.34 – 7.33 (m, 3H), 7.06 – 7.04 (m, 2H), 6.87 (d, *J* = 8.2 Hz, 1H), 6.75 (s, 1H), 3.62 (dd, *J* = 13.9, 5.5 Hz, 1H), 3.35 – 3.30 (m, 1H), 3.09 (d, *J* = 12.6 Hz, 1H), 3.02 – 2.95 (m, 2H), 2.57 (d, *J* = 17.8 Hz, 1H), 2.36 (s, 3H), 1.52 – 1.48 (m, 4H); **<sup>13</sup>C NMR** (125 MHz, CDCl<sub>3</sub>) δ 215.5, 213.5, 181.6, 164.3, 157.3, 148.0, 136.2, 130.0, 129.1, 127.9, 127.5, 123.6, 118.3, 113.4, 113.3, 100.0, 66.3, 60.5, 58.9, 44.9, 44.3, 42.3, 22.2, 21.3. **IR**: 2906, 2813, 2217, 1766, 1730, 1634, 1579, 1437, 1330, 1224, 1143, 854 cm<sup>-1</sup>. **HRMS** (TOF MS ES+) calcd. for [C<sub>26</sub>H<sub>22</sub>N<sub>2</sub>O<sub>3</sub>+H]<sup>+</sup> [M + H<sup>+</sup>] *m/z* 411.1703, found 411.1715.

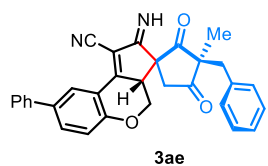

Compound **3ae** was prepared by general procedure for synthesis of [4,4]-carbospirocycles described above using **1ae** (0.22 mmol, 60 mg) and purified by silica gel column chromatography (5→15% EtOAc: hexane) to provide pure compound as yellow solid (73 mg, 70%). **<sup>1</sup>H NMR** (400 MHz, CDCl<sub>3</sub>) δ 9.36 (bs, 1H), 8.30 (s, 1H), 7.70 (d, *J* = 8.8 Hz, 1H), 7.55 (d, *J* = 7.6 Hz, 2H), 7.44 (t, *J* = 7.6 Hz, 2H), 7.36 – 7.35 (m, 4H), 7.08 – 7.00 (m, 3H), 3.68 (dd, *J* = 13.9, 5.6 Hz, 1H), 3.40 (dd, *J* = 13.9, 10.1 Hz, 1H), 3.12 – 3.04 (m, 2H), 2.98 (d, *J* = 12.7 Hz, 1H), 2.60 (d, *J* = 17.8 Hz, 1H), 1.54 – 1.50 (m, 4H); **<sup>13</sup>C NMR** (100 MHz, CDCl<sub>3</sub>) δ 215.4, 213.4, 181.3, 164.3, 156.5, 139.0, 136.2, 135.3, 134.8, 130.0, 129.2 (2×C), 127.9, 127.8, 126.7, 125.5, 118.7, 115.9, 113.2, 101.4, 66.5, 60.6, 58.9, 44.9, 44.3, 42.4, 21.4. **IR**: 3250, 3032, 2217, 1761, 1728, 1631, 1603, 1480, 1452, 1204, 1037, 762 cm<sup>-1</sup>. **HRMS** (TOF MS ES+) calcd. for [C<sub>31</sub>H<sub>24</sub>N<sub>2</sub>O<sub>3</sub>+H]<sup>+</sup> [M + H<sup>+</sup>] *m/z* 473.1860, found 473.1883

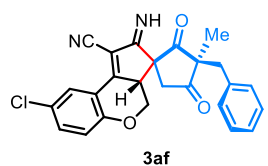

Compound **3af** was prepared by general procedure for synthesis of [4,4]-carbospirocycles described above using **1af** (0.22 mmol, 50 mg) and purified by silica gel column chromatography (5→15% EtOAc: hexane) to provide pure compound as yellow solid (68 mg, 72%). **<sup>1</sup>H NMR** (400 MHz, CDCl<sub>3</sub>) δ 9.41 (s, 1H), 8.02 (s, 1H), 7.40 – 7.33 (m, 4H), 7.06 – 7.04 (m, 2H), 6.90 (d, *J* = 8.9 Hz, 1H), 3.60 (dd, *J* = 13.9, 5.5 Hz, 1H), 3.35 (t, *J* = 12.0 Hz, 1H), 3.11 – 2.96 (m, 3H), 2.58 (d, *J* = 17.8 Hz, 1H), 1.52 – 1.48 (m, 4H); **<sup>13</sup>C NMR** (100 MHz, CDCl<sub>3</sub>) δ 215.2, 213.2, 181.0, 162.5, 155.6, 136.2, 135.8, 130.0, 129.2, 127.9, 127.4, 126.6, 119.8, 116.6, 112.6, 102.2, 66.4, 60.4, 58.9, 44.9, 44.2, 42.1, 21.3. **IR**: 3260, 3058, 2936, 2850, 2217, 1761, 1728, 1640, 1598, 1453, 1376, 1341, 1207, 1092, 875 cm<sup>-1</sup>. **HRMS** (TOF MS ES+) calcd. for [C<sub>25</sub>H<sub>19</sub>N<sub>2</sub>O<sub>3</sub>Cl+H]<sup>+</sup> [M + H<sup>+</sup>] *m/z* 431.1157, found 431.1166.



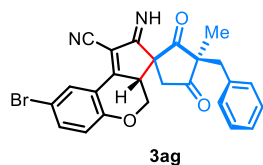

Compound **3ag** was prepared by general procedure for synthesis of [4,4]-carbospirocycles described above using **1ag** (0.22 mmol, 60 mg) and purified by silica gel column chromatography (5→15% EtOAc: hexane) to provide pure compound as yellow solid (79 mg, 76%), melting point = 188-190 °C. <sup>1</sup>H NMR (400 MHz, CDCl<sub>3</sub>) δ 9.41 (s, 1H), 8.15 (s, 1H), 7.52 (d, *J* = 8.9 Hz, 1H), 7.33 – 7.32 (m, 3H), 7.05 – 7.03 (m, 2H), 6.83 (d, *J* = 9.0 Hz, 1H), 3.61 – 3.56 (m, 1H), 3.37 – 3.31 (m, 1H), 3.10 – 2.95 (m, 3H), 2.57 (d, *J* = 17.8 Hz, 1H), 1.51 – 1.46 (m, 4H); <sup>13</sup>C NMR (100 MHz, CDCl<sub>3</sub>) δ 215.1, 213.2, 180.9, 162.4, 156.1, 138.6, 136.1, 130.0, 129.7, 129.2, 127.9, 120.1, 117.2, 114.5, 112.6, 102.2, 66.4, 60.4, 58.9, 44.9, 44.2, 42.1, 21.3. IR: 3265, 3062, 2222, 1766, 1728, 1643, 1603, 1476, 1452, 1332, 1219, 861 cm<sup>-1</sup>. HRMS (TOF MS ES+) calcd. for [C<sub>25</sub>H<sub>19</sub>N<sub>2</sub>O<sub>3</sub>Br+H]<sup>+</sup> [M + H<sup>+</sup>] *m/z* 475.0652, found 475.0671.

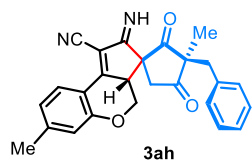

Compound **3ah** was prepared by general procedure for synthesis of [4,4]-carbospirocycles described above using **1ah** (0.22 mmol, 46 mg) and purified by silica gel column chromatography (5→15% EtOAc: hexane) to provide pure compound as yellow solid (66 mg, 73%), melting point = 184-186 °C. <sup>1</sup>H NMR (400 MHz, CDCl<sub>3</sub>) δ 9.29 (s, 1H), 7.86 (s, 1H), 7.34 – 7.33 (m, 3H), 7.26 (d, *J* = 8.1 Hz, 1H), 7.06 – 7.04 (m, 2H), 6.84 (d, *J* = 8.6 Hz, 1H), 3.63 (dd, *J* = 14.0, 5.5 Hz, 1H), 3.36 – 3.30 (m, 1H), 3.09 (d, *J* = 12.7 Hz, 1H), 3.02 – 2.95 (m, 2H), 2.57 (d, *J* = 17.8 Hz, 1H), 2.32 (s, 3H), 1.52 – 1.48 (m, 4H); <sup>13</sup>C NMR (125 MHz, CDCl<sub>3</sub>) δ 215.4, 213.5, 181.5, 164.4, 155.3, 137.3, 136.2, 131.7, 130.0, 129.1, 127.9, 127.2, 118.0, 115.4, 113.3, 100.8, 66.3, 60.5, 58.9, 44.9, 44.3, 42.4, 21.3, 20.6. IR: 2922, 2835, 2222, 1776, 1725, 1620, 1593, 1450, 1346, 1225, 1051, 857 cm<sup>-1</sup>. HRMS (TOF MS ES+) calcd. for [C<sub>26</sub>H<sub>22</sub>N<sub>2</sub>O<sub>3</sub>+H]<sup>+</sup> [M + H<sup>+</sup>] *m/z* 411.1703, found 411.1715.

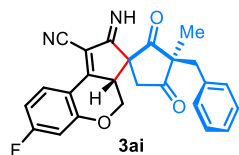

Compound **3ai** was prepared by general procedure for synthesis of [4,4]-carbospirocycles described above using **1ai** (0.22 mmol, 47 mg) and purified by silica gel column chromatography (5→15% EtOAc: hexane) to provide pure compound as yellow solid (62 mg, 68%). <sup>1</sup>H NMR (500 MHz, CDCl<sub>3</sub>) δ 9.32 (s, 1H), 8.11 (dd, *J* = 8.9, 6.2 Hz, 1H), 7.35 – 7.34 (m, 3H), 7.07 – 7.05 (m, 2H), 6.83 – 6.79 (m, 1H), 6.65 (dd, *J* = 9.6, 2.6 Hz, 1H), 3.62 (dd, *J* = 13.8, 5.6 Hz, 1H), 3.39 – 3.35 (m, 1H), 3.10 (d, *J* = 12.7 Hz, 1H), 3.02 (dd, *J* = 10.2, 5.6 Hz, 1H), 2.98 (d, *J* = 12.7 Hz, 1H), 2.58 (d, *J* = 17.8 Hz, 1H), 1.52 – 1.48 (m, 4H); <sup>13</sup>C NMR (125 MHz, CDCl<sub>3</sub>) δ 215.4, 213.4, 181.2, 167.1 (d, *J* = 258.4 Hz), 163.0, 159.0 (d, *J* = 13.5 Hz), 136.2, 130.1, 129.9 (d, *J* = 11.1 Hz), 129.2, 127.9, 113.2, 112.5 (d, *J* = 2.8 Hz), 110.8 (d, *J* = 23.1 Hz), 105.4 (d, *J* = 24.7 Hz), 100.8, 66.6, 60.4, 58.9, 44.9, 44.3, 42.1, 21.3; <sup>19</sup>F NMR (471 MHz, CDCl<sub>3</sub>) δ -98.8. HRMS (TOF MS ES+) calcd. for [C<sub>25</sub>H<sub>19</sub>N<sub>2</sub>O<sub>3</sub>F+Na]<sup>+</sup> [M + Na<sup>+</sup>] *m/z* 437.1272, found 437.1265.



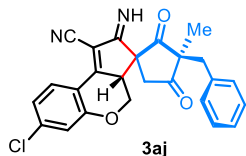

Compound **3aj** was prepared by general procedure for synthesis of [4,4]-carbospirocycles described above using **1aj** (0.22 mmol, 50 mg) and purified by silica gel column chromatography (5→15% EtOAc: hexane) to provide pure compound as yellow solid (62 mg, 65%). <sup>1</sup>H NMR (500 MHz, CDCl<sub>3</sub>) δ 9.36 (s, 1H), 8.02 (d, *J* = 8.6 Hz, 1H), 7.36 – 7.33 (m, 3H), 7.07 – 7.04 (m, 3H), 6.97 (d, *J* = 2.0 Hz, 1H), 3.61 (dd, *J* = 13.9, 5.6 Hz, 1H), 3.36 (dd, *J* = 13.9, 10.2 Hz, 1H), 3.10 (d, *J* = 12.7 Hz, 1H), 3.02 (dd, *J* = 10.2, 5.6 Hz, 1H), 2.98 (d, *J* = 12.7 Hz, 1H), 2.58 (d, *J* = 17.8 Hz, 1H), 1.52 – 1.48 (m, 4H); <sup>13</sup>C NMR (125 MHz, CDCl<sub>3</sub>) δ 215.3, 213.3, 181.1, 162.9, 157.5, 141.9, 136.2, 130.1, 129.2, 128.6, 127.9, 123.0, 118.5, 114.3, 113.0, 101.5, 66.5, 60.4, 58.9, 44.9, 44.3, 42.1, 21.3. IR: 3054, 2986, 2308, 1768, 1731, 1623, 1595, 1422, 1352, 1266, 896, 740 cm<sup>-1</sup>. HRMS (TOF MS ES+) calcd. for [C<sub>25</sub>H<sub>19</sub>N<sub>2</sub>O<sub>3</sub>Cl+H]<sup>+</sup> [M + H]<sup>+</sup> m/z 431.1157, found 431.1155.

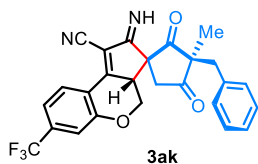

Compound **3ak** was prepared by general procedure for synthesis of [4,4]-carbospirocycles described above using **1ak** (0.22 mmol, 58 mg) and purified by silica gel column chromatography (5→15% EtOAc: hexane) to provide pure compound as yellow solid (73 mg, 72%). <sup>1</sup>H NMR (500 MHz, CDCl<sub>3</sub>) δ 9.49 (s, 1H), 8.20 (d, *J* = 8.2 Hz, 1H), 7.37 – 7.33 (m, 3H), 7.30 (dd, *J* = 8.3, 1.8 Hz, 1H), 7.22 (d, *J* = 1.8 Hz, 1H), 7.07 – 7.05 (m, 2H), 3.62 (dd, *J* = 13.8, 5.6 Hz, 1H), 3.41 (dd, *J* = 13.8, 10.3 Hz, 1H), 3.11 – 3.06 (m, 2H), 2.99 (d, *J* = 12.7 Hz, 1H), 2.61 (d, *J* = 17.8 Hz, 1H), 1.54 – 1.51 (m, 4H); <sup>13</sup>C NMR (125 MHz, CDCl<sub>3</sub>) δ 215.2, 213.1, 180.8, 162.4, 156.9, 136.9 (q, *J* = 33.3 Hz), 136.2, 130.1, 129.2, 128.5, 128.0, 123.0 (q, *J* = 273.1 Hz), 118.5 (q, *J* = 3.6 Hz), 118.3, 115.7 (q, *J* = 4.0 Hz), 112.6, 103.4, 66.6, 60.4, 58.9, 44.9, 44.2, 42.2, 21.3; <sup>19</sup>F NMR (471 MHz, CDCl<sub>3</sub>) δ -63.8. IR: 3266, 3077, 2950, 2869, 2218, 1759, 1729, 1629, 1606, 1499, 1376, 1207, 1066, 858 cm<sup>-1</sup>. HRMS (TOF MS ES+) calcd. for [C<sub>26</sub>H<sub>19</sub>N<sub>2</sub>O<sub>3</sub>F<sub>3</sub>+H]<sup>+</sup> [M + H]<sup>+</sup> m/z 465.1421, found 465.1444.

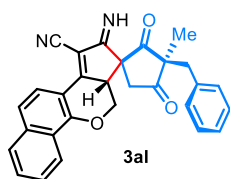

Compound **3al** was prepared by general procedure for synthesis of [4,4]-carbospirocycles described above using **1al** (0.22 mmol, 54 mg) and purified by silica gel column chromatography (5→15% EtOAc: hexane) to provide pure compound as yellow solid (63 mg, 64%), melting point = 172–174 °C. <sup>1</sup>H NMR (500 MHz, CDCl<sub>3</sub>) δ 9.29 (s, 1H), 8.22 (d, *J* = 8.3 Hz, 1H), 8.04 (d, *J* = 8.8 Hz, 1H), 7.79 (d, *J* = 8.1 Hz, 1H), 7.64 (t, *J* = 6.9 Hz, 1H), 7.55 (t, *J* = 7.6 Hz, 1H), 7.45 (d, *J* = 8.8 Hz, 1H), 7.42 – 7.34 (m, 3H), 7.17 – 7.03 (m, 2H), 3.78 (dd, *J* = 14.1, 5.6 Hz, 1H), 3.53 (dd, *J* = 14.2, 10.1 Hz, 1H), 3.30 (dd, *J* = 10.1, 5.7 Hz, 1H), 3.12 (d, *J* = 12.7 Hz, 1H), 3.00 (d, *J* = 12.7 Hz, 1H), 2.62 (d, *J* = 17.8 Hz, 1H), 1.59 – 1.55 (m, 4H); <sup>13</sup>C NMR (125 MHz, CDCl<sub>3</sub>) δ 215.5, 213.6, 181.7, 163.7, 155.4, 137.1, 136.3, 130.2, 130.1, 129.2, 128.2, 127.9, 127.0, 124.6, 123.8, 122.2, 122.0, 113.7, 110.3, 100.2, 67.1, 60.6, 59.0, 44.9, 44.3, 41.9, 21.4. IR: 2923, 2850, 2212, 1736, 1680, 1614, 1536, 1508, 1368, 1269, 1108, 806 cm<sup>-1</sup>. HRMS (TOF MS ES+) calcd. for [C<sub>29</sub>H<sub>22</sub>N<sub>2</sub>O<sub>3</sub>+H]<sup>+</sup> [M + H]<sup>+</sup> m/z 447.1703, found 447.1715.

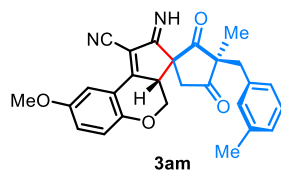

Compound **3am** was prepared by general procedure for synthesis of [4,4]-carbospirocycles described above using **1ac** (0.22 mmol, 49 mg) and purified by silica gel column chromatography (5→15% EtOAc: hexane) to provide pure compound as yellow solid (75 mg, 78%). <sup>1</sup>H NMR (400 MHz, CDCl<sub>3</sub>) δ 9.30 (s, 1H), 7.53 (d, *J* = 2.9 Hz, 1H), 7.27 – 7.19 (m, 1H), 7.16 – 7.14 (m, 1H), 7.07 (dd, *J* = 9.1, 3.0 Hz, 1H), 6.89 – 6.84 (m, 3H), 3.80 (s, 3H), 3.65 (dd, *J* = 13.9, 5.5 Hz, 1H), 3.36 – 3.30 (m, 1H), 3.07 – 2.99 (m, 2H), 2.91 (d, *J* = 12.6 Hz, 1H), 2.55 (d, *J* = 17.7 Hz, 1H), 2.33 (s, 3H), 1.50 – 1.45 (m, 4H); <sup>13</sup>C NMR (100 MHz, CDCl<sub>3</sub>) δ 215.6, 213.5, 181.5, 164.6, 154.2, 152.0, 139.1, 136.1, 130.5, 129.1, 128.5, 127.0, 125.2, 119.4, 115.5, 113.3, 108.3, 101.0, 66.6, 60.6, 58.8, 55.9, 44.9, 44.2, 42.5, 21.4, 21.2. IR: 3260, 2952, 2869, 2218, 1770, 1729, 1634, 1600, 1490, 1330, 1209, 1044, 733 cm<sup>-1</sup>. HRMS (TOF MS ES+) calcd. for [C<sub>27</sub>H<sub>24</sub>N<sub>2</sub>O<sub>4</sub>+H]<sup>+</sup> [M + H<sup>+</sup>] *m/z* 441.1809, found 441.1790.

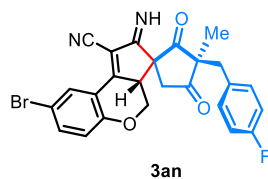

Compound **3an** was prepared by general procedure for synthesis of [4,4]-carbospirocycles described above using **1ag** (0.22 mmol, 60 mg) and purified by silica gel column chromatography (5→15% EtOAc : hexane) to provide pure compound as yellow solid (77 mg, 71%). <sup>1</sup>H NMR (400 MHz, CDCl<sub>3</sub>) δ 9.44 (bs, 1H), 8.15 (s, 1H), 7.53 (d, *J* = 9.0 Hz, 1H), 7.03 – 7.01 (m, 4H), 6.85 (d, *J* = 9.0 Hz, 1H), 3.64 - 3.59 (m, 1H), 3.48 – 3.41 (m, 1H), 3.19 – 3.15 (m, 1H), 3.06 (d, *J* = 13.0 Hz, 1H), 2.94 (d, *J* = 12.9 Hz, 1H), 2.64 (d, *J* = 17.9 Hz, 1H), 1.56 – 1.39 (m, 4H); <sup>13</sup>C NMR (100 MHz, CDCl<sub>3</sub>) δ 215.0, 212.9, 180.7, 162.3 (d, *J* = 248.1 Hz), 162.1, 156.0, 138.7, 131.9 (d, *J* = 3.5 Hz), 131.6 (d, *J* = 7.7 Hz), 129.6, 120.2, 117.1, 116.0 (d, *J* = 21.2 Hz), 114.5, 112.6, 102.2, 66.5, 60.4, 58.8, 44.2, 43.6, 42.1, 21.5; <sup>19</sup>F NMR (471 MHz, CDCl<sub>3</sub>) δ -113.4. IR: 3250, 2960, 2900, 2217, 1787, 1729, 1644, 1603, 1509, 1391, 1325, 1221, 850 cm<sup>-1</sup>. HRMS (TOF MS ES+) calcd. for [C<sub>27</sub>H<sub>18</sub>N<sub>2</sub>O<sub>3</sub>FBr+H]<sup>+</sup> [M + H<sup>+</sup>] *m/z* 493.0558, found 493.0555.

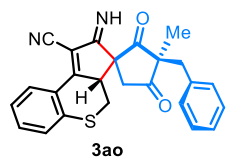

Compound **3ao** was prepared by general procedure for synthesis of [4,4]-carbospirocycles described above using **1am** (0.22 mmol, 46 mg) and purified by silica gel column chromatography (5→15% EtOAc: hexane) to provide pure compound as yellow solid (64 mg, 71%), melting point = 167-199 °C. <sup>1</sup>H NMR (400 MHz, CDCl<sub>3</sub>) δ 9.37 (bs, 1H), 8.26 (d, *J* = 8.0 Hz, 1H), 7.38 – 7.29 (m, 4H), 7.22 – 7.18 (m, 2H), 7.06 – 7.05 (m, 2H), 3.62 – 3.57 (m, 1H), 3.07 (d, *J* = 12.6 Hz, 1H), 2.95 (d, *J* = 12.6 Hz, 1H), 2.69 – 2.64 (m, 1H), 2.52 – 2.45 (m, 1H), 1.71 (d, *J* = 18.2 Hz, 1H), 1.47 (s, 3H), 1.45 – 1.41 (m, 1H); <sup>13</sup>C NMR (100 MHz, CDCl<sub>3</sub>) δ 215.2, 213.7, 180.7, 167.1, 138.2, 136.2, 133.4, 130.0, 129.8, 129.2, 127.8, 127.4, 125.4, 125.3, 113.6, 104.6, 62.8, 58.9, 45.5, 44.9, 44.6, 27.3, 21.5. IR: 3055, 2986, 2308, 1765, 1731, 1266, 896, 740, 706 cm<sup>-1</sup>. HRMS (TOF MS ES+) calcd. for [C<sub>25</sub>H<sub>20</sub>N<sub>2</sub>O<sub>2</sub>S+H]<sup>+</sup> [M + H<sup>+</sup>] *m/z* 413.1318, found 413.1325.

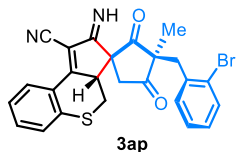

Compound **3ap** was prepared by general procedure for synthesis of [4,4]-carbospirocycles described above by using **1am** (0.22 mmol, 46 mg) and purified by silica gel column chromatography (5→15% EtOAc : hexane) to provide pure compound as yellow solid (69 mg, 64%), melting point = 185-187 °C.  $^1\text{H NMR}$  (400 MHz,  $\text{CDCl}_3$ )  $\delta$  9.37 (bs, 1H), 8.27 (d,  $J = 7.9$  Hz, 1H), 7.59 (d,  $J = 7.9$  Hz, 1H), 7.37 (t,  $J = 7.5$  Hz, 1H), 7.30 (t,  $J = 7.5$  Hz, 1H), 7.24 – 7.13 (m, 4H), 3.75 (dd,  $J = 14.1, 4.2$  Hz, 1H), 3.31 (d,  $J = 13.3$  Hz, 1H), 3.15 (d,  $J = 13.3$  Hz, 1H), 2.74 – 2.63 (m, 2H), 2.15 (d,  $J = 17.3$  Hz, 1H), 1.83 – 1.79 (m, 1H), 1.49 (s, 3H);  $^{13}\text{C NMR}$  (100 MHz,  $\text{CDCl}_3$ )  $\delta$  213.9, 211.4, 180.6, 167.1, 138.0, 135.7 (2×C), 133.9, 133.4, 132.7, 129.8, 129.5, 127.9, 127.4, 125.4 (2×C), 113.5, 104.7, 63.1, 57.3, 45.4, 44.3, 43.3, 27.7, 21.2. **IR**: 3250, 2921, 2843, 2217, 1762, 1730, 1633, 1586, 1438, 1349, 1041, 1021, 879  $\text{cm}^{-1}$ . **HRMS** (TOF MS ES+) calcd. for  $[\text{C}_{25}\text{H}_{19}\text{N}_2\text{O}_2\text{BrS}+\text{H}]^+$   $[\text{M} + \text{H}^+]$   $m/z$  491.0423, found 491.0430.

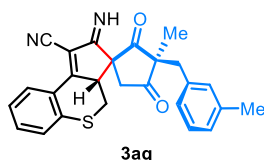

Compound **3aq** was prepared by general procedure for synthesis of [4,4]-carbospirocycles described above using **1am** (0.22 mmol, 46 mg) and purified by silica gel column chromatography (5→15% EtOAc: hexane) to provide pure compound as yellow solid (62 mg, 66%), melting point = 211-213 °C.  $^1\text{H NMR}$  (400 MHz,  $\text{CDCl}_3$ )  $\delta$  9.36 (bs, 1H), 8.27 (d,  $J = 8.0$  Hz, 1H), 7.38 – 7.34 (m, 1H), 7.23 – 7.17 (m, 3H), 7.10 (d,  $J = 7.6$  Hz, 1H), 6.86 – 6.64 (m, 2H), 3.62 (dd,  $J = 14.1, 4.2$  Hz, 1H), 3.04 (d,  $J = 12.6$  Hz, 1H), 2.90 (d,  $J = 12.6$  Hz, 1H), 2.63 (d,  $J = 17.9$  Hz, 1H), 2.51 (dd,  $J = 14.0, 12.1$  Hz, 1H), 2.34 (s, 3H), 1.68 (d,  $J = 17.9$  Hz, 1H), 1.52 – 1.47 (m, 4H);  $^{13}\text{C NMR}$  (100 MHz,  $\text{CDCl}_3$ )  $\delta$  215.2, 213.6, 180.7, 167.1, 139.2, 138.2, 136.1, 133.4, 130.6, 129.8, 129.1, 128.4, 127.3, 127.0, 125.4, 125.3, 113.6, 104.7, 62.8, 58.8, 45.4, 45.0, 44.7, 27.4, 21.6, 21.5. **IR**: 3270, 2916, 2860, 2217, 1766, 1728, 1634, 1583, 1437, 1348, 1306, 859  $\text{cm}^{-1}$ . **HRMS** (TOF MS ES+) calcd. for  $[\text{C}_{26}\text{H}_{22}\text{N}_2\text{O}_2\text{S}+\text{H}]^+$   $[\text{M} + \text{H}^+]$   $m/z$  427.1475, found 427.1483.

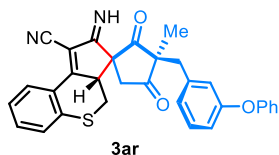

Compound **3ar** was prepared by general procedure for synthesis of [4,4]-carbospirocycles described above using **1am** (0.22 mmol, 46 mg) and purified by silica gel column chromatography (5→15% EtOAc: hexane) to provide pure compound as yellow solid (69 mg, 62%), melting point = 207-209 °C.  $^1\text{H NMR}$  (400 MHz,  $\text{CDCl}_3$ )  $\delta$  9.40 (bs, 1H), 8.29 (d,  $J = 8.0$  Hz, 1H), 7.40 – 7.32 (m, 3H), 7.27 – 7.21 (m, 3H), 7.14 (t,  $J = 7.4$  Hz, 1H), 6.99 (d,  $J = 7.9$  Hz, 2H), 6.91 – 6.89 (m, 1H), 6.76 (d,  $J = 7.6$  Hz, 1H), 6.70 (s, 1H), 3.71 (dd,  $J = 14.1, 4.2$  Hz, 1H), 3.05 (d,  $J = 12.6$  Hz, 1H), 2.91 (d,  $J = 12.6$  Hz, 1H), 2.73 (d,  $J = 17.8$  Hz, 1H), 2.64 (t,  $J = 13.1$  Hz, 1H), 1.83 – 1.78 (m, 2H), 1.47 (s, 3H);  $^{13}\text{C NMR}$  (100 MHz,  $\text{CDCl}_3$ )  $\delta$  214.8, 213.2, 180.5, 167.0, 158.3, 156.3, 138.2 (2×C), 133.4, 130.4, 130.1, 129.8, 127.4, 125.4, 125.3, 124.3, 124.2, 119.8, 119.5, 117.3, 113.6, 104.7, 62.9, 58.6, 45.4, 44.7, 44.5, 27.5, 21.8. **IR**: 3286, 3058, 2212, 1771, 1728, 1630, 1583, 1486, 1437, 1345, 1258, 1143, 870  $\text{cm}^{-1}$ . **HRMS** (TOF MS ES+) calcd. for  $[\text{C}_{31}\text{H}_{24}\text{N}_2\text{O}_3\text{S}+\text{H}]^+$   $[\text{M} + \text{H}^+]$   $m/z$  505.1580, found 505.1592.

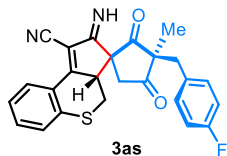

Compound **3as** was prepared by general procedure for synthesis of [4,4]-carbospirocycles described above using **1am** (0.22 mmol, 46 mg) and purified by silica gel column chromatography (5→15% EtOAc: hexane) to provide pure compound as yellow solid (66 mg, 70%), melting point = 160-162 °C. <sup>1</sup>H NMR (400 MHz, CDCl<sub>3</sub>) δ 9.41 (bs, 1H), 8.26 (d, *J* = 8.0 Hz, 1H), 7.37 (t, *J* = 7.7 Hz, 1H), 7.24 – 7.18 (m, 2H), 7.05 – 6.98 (m, 4H), 3.60 – 3.55 (m, 1H), 3.04 (d, *J* = 12.9 Hz, 1H), 2.94 (d, *J* = 12.9 Hz, 1H), 2.76 (d, *J* = 18.1 Hz, 1H), 2.59 (t, *J* = 13.1 Hz, 1H), 1.78 (d, *J* = 18.1 Hz, 1H), 1.59 – 1.56 (m, 1H), 1.46 (s, 3H); <sup>13</sup>C NMR (100 MHz, CDCl<sub>3</sub>) δ 215.1, 213.5, 180.4, 166.9, 162.3 (d, *J* = 248.3 Hz), 138.1, 133.4, 132.0 (d, *J* = 3.3 Hz), 131.7 (d, *J* = 7.7 Hz), 129.8, 127.4, 125.4 (2×C), 116.0 (d, *J* = 21.2 Hz), 113.6, 104.7, 62.8, 58.8, 45.7, 44.5, 43.5, 27.6, 21.7; <sup>19</sup>F NMR (471 MHz, CDCl<sub>3</sub>) δ -113.6. IR: 3255, 3062, 2976, 2864, 2223, 1766, 1729, 1633, 1586, 1439, 1371, 1241, 1040, 866 cm<sup>-1</sup>. HRMS (TOF MS ES+) calcd. for [C<sub>25</sub>H<sub>19</sub>N<sub>2</sub>O<sub>2</sub>FS+Na]<sup>+</sup> [M + Na<sup>+</sup>] *m/z* 453.1043, found 453.1054.

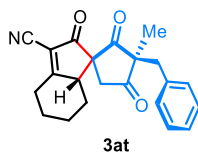

Compound **3at** was prepared by general procedure for synthesis of [4,4]-carbospirocycles described above using **1an** (0.22 mmol, 32 mg) and purified by silica gel column chromatography (5→15% EtOAc: hexane) to provide pure compound as white sticky solid (47 mg, 62%). <sup>1</sup>H NMR (400 MHz, CDCl<sub>3</sub>) δ 7.26 – 7.24 (m, 3H), 7.02 – 6.98 (m, 2H), 3.17 – 3.13 (m, 1H), 3.02 – 2.95 (m, 2H), 2.68 (d, *J* = 18.6 Hz, 1H), 2.59 – 2.55 (m, 1H), 2.52 – 2.44 (m, 1H), 2.15 – 2.10 (m, 1H), 1.73 (d, *J* = 18.5 Hz, 2H), 1.36 – 1.29 (m, 5H), 0.97 – 0.94 (m, 1H), 0.70 – 0.60 (m, 1H); <sup>13</sup>C NMR (100 MHz, CDCl<sub>3</sub>) δ 213.4, 212.8, 198.0, 197.5, 136.1, 130.0, 128.9, 127.7, 111.0, 110.6, 67.6, 59.3, 48.2, 43.9, 41.9, 31.5, 31.4, 27.3, 24.6, 21.1. IR: 2941, 2860, 2227, 1767, 1730, 1712, 1624, 1585, 1451, 1224, 1021, 847 cm<sup>-1</sup>. HRMS (TOF MS ES+) calcd. for [C<sub>22</sub>H<sub>21</sub>N<sub>2</sub>O<sub>3</sub>+Na]<sup>+</sup> [M + Na<sup>+</sup>] *m/z* 370.1414, found 370.1417.

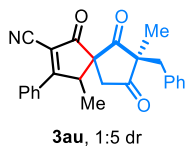

Compound **3au** was prepared by general procedure for synthesis of [4,4]-carbospirocycles described above using **1ao** (0.22 mmol, 40 mg) and purified by silica gel column chromatography (5→15% EtOAc: hexane) to provide pure compound as yellow solid (32 mg, 38%). <sup>1</sup>H NMR (500 MHz, CDCl<sub>3</sub>) (major diastereomer) δ 9.35 (s, 1H), 7.76 – 7.73 (m, 2H), 7.59 – 7.51 (m, 3H), 7.33 – 7.24 (m, 3H), 7.09 – 7.05 (m, 2H), 3.33 – 3.27 (m, 1H), 3.06 (d, *J* = 12.8 Hz, 1H), 2.96 (d, *J* = 12.7 Hz, 1H), 2.84 (d, *J* = 17.8 Hz, 1H), 1.74 (d, *J* = 17.8 Hz, 1H), 1.43 (s, 3H), 0.55 (d, *J* = 7.4 Hz, 3H); <sup>13</sup>C NMR (125 MHz, CDCl<sub>3</sub>) δ 214.1 CC\*, 214.0 CC\*, 179.5 CC\*, 177.0 CC\*, 136.3 CC\*, 135.1 C\*, 134.0 C, 132.7 C, 131.0 C\*, 130.0 CC\*, 129.7 C\*, 129.5 C, 129.0 C\*, 128.9 C, 128.4 C\*, 128.2 C, 127.7 CC\*, 113.6 CC\*, 107.6 C, 101.9 C\*, 69.7 C\*, 65.2 C, 59.1 CC\*, 44.6 C\*, 44.4 C, 43.8 C\*, 43.6 C, 42.6 C\*, 42.4 C, 22.6 C, 21.6 C\*, 17.1 C\*, 16.4 C. [C = major diastereomer, C\* = minor diastereomer, & CC\* = both diastereomers peaks were merging]. IR: 3260, 3067, 2956, 2855, 2218, 1767, 1728, 1637, 1600, 1493, 1372, 1224, 1092, 879 cm<sup>-1</sup>. HRMS (TOF MS ES+) calcd. for [C<sub>25</sub>H<sub>22</sub>N<sub>2</sub>O<sub>2</sub>+H]<sup>+</sup> [M + H<sup>+</sup>] *m/z* 383.1754, found 383.1757.

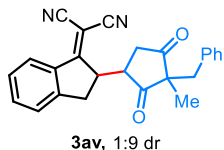

Compound **3av** was prepared by general procedure for synthesis of [4,4]-carbospirocycles described above using **1ap** (0.22 mmol, 40 mg) and purified by silica gel column chromatography (5→15% EtOAc: hexane) to provide pure compound as white solid (57 mg, 68%). <sup>1</sup>H NMR (400 MHz, CDCl<sub>3</sub>) of major diastereomer: δ 8.27 (d, *J* = 8.1 Hz, 1H), 7.52 (t, *J* = 7.4 Hz, 1H), 7.37 (t, *J* = 7.7 Hz, 1H), 7.33 – 7.27 (m, 3H), 7.11 – 7.07 (m, 2H), 6.97 (d, *J* = 7.8 Hz, 1H), 4.14 – 4.11 (m, 1H), 3.52 – 3.46 (m, 1H), 3.09 – 3.02 (m, 2H), 2.76 (dd, *J* = 18.6, 7.1 Hz, 1H), 2.37 (dd, *J* = 18.6, 10.1 Hz, 1H), 1.29 (s, 3H), 1.24 – 1.18 (m, 1H), 0.85 (d, *J* = 18.6 Hz, 1H). <sup>13</sup>C NMR (100 MHz, CDCl<sub>3</sub>) of major diastereomer: δ 214.7, 213.8, 179.9, 152.3, 136.8, 135.8, 135.6, 130.7, 128.8, 128.6, 127.3, 126.1, 125.5, 113.0, 112.7, 75.1, 59.1, 48.0, 43.9, 40.9, 37.6, 32.6, 22.8. IR: 3457, 3062, 2925, 2855, 2225, 1763, 1728, 1608, 1570, 1493, 1373, 1244, 1046, 738 cm<sup>-1</sup>. HRMS (TOF MS ES+) calcd. for [C<sub>25</sub>H<sub>20</sub>N<sub>2</sub>O<sub>2</sub>+H]<sup>+</sup> [M + H<sup>+</sup>] m/z 381.1598, found 381.1598.

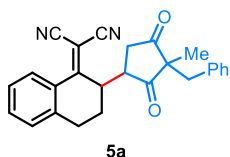

Compound **5a** was prepared by general procedure for isolation of reaction of intermediate **5a** described above using **1a** (0.22 mmol, 42 mg) and purified by silica gel column chromatography (5→15% EtOAc: hexane) to provide pure compound as yellow sticky solid (20 mg, 23%). <sup>1</sup>H NMR (500 MHz, CDCl<sub>3</sub>) δ 7.84 (dd, *J* = 7.8, 1.3 Hz, 1H), 7.49 – 7.45 (m, 1H), 7.30 – 7.27 (m, 1H), 7.17 – 7.15 (m, 1H), 7.09 – 7.05 (m, 2H), 7.02 – 7.01 (m, 1H), 6.91 – 6.89 (m, 2H), 3.45 – 3.41 (m, 1H), 3.03 (d, *J* = 12.9 Hz, 1H), 2.85 – 2.80 (m, 1H), 2.78 (d, *J* = 12.9 Hz, 1H), 2.75 – 2.66 (m, 2H), 2.28 – 2.23 (m, 1H), 2.05 – 1.99 (m, 2H), 1.58 – 1.56 (m, 1H), 1.23 (s, 3H); <sup>13</sup>C NMR (125 MHz, CDCl<sub>3</sub>) δ 215.4, 213.6, 174.7, 140.0, 135.9, 133.7, 129.8, 129.3, 128.7, 128.5, 128.4, 127.5, 127.1, 113.3, 113.0, 80.3, 59.4, 47.0, 43.8, 42.7, 40.6, 24.9, 24.8, 20.2. HRMS (TOF MS ES+) calcd. for [C<sub>26</sub>H<sub>22</sub>N<sub>2</sub>O<sub>2</sub>+H]<sup>+</sup> [M + H<sup>+</sup>] m/z 395.1754, found 395.1752.

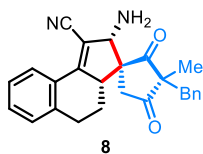

Compound **8** was prepared by general procedure for chemoselective reduction for synthesis of compound described above using **3a** (0.22 mmol, 87 mg) and purified by silica gel column chromatography (15→35% EtOAc: hexane) to provide pure compound as yellow solid (75 mg, 86%), melting point = 142–144 °C. <sup>1</sup>H NMR (400 MHz, CDCl<sub>3</sub>) δ 7.38 (d, *J* = 7.6 Hz, 1H), 7.25 – 7.18 (m, 4H), 7.12 (t, *J* = 7.4 Hz, 1H), 7.05 – 6.99 (m, 3H), 4.43 (d, *J* = 6.4 Hz, 1H), 4.30 (bs, 2H), 3.06 – 2.97 (m, 2H), 2.61 – 2.53 (m, 2H), 2.40 – 2.32 (m, 1H), 2.01 (d, *J* = 19.2 Hz, 1H), 1.81 – 1.76 (m, 1H), 1.33 (s, 3H), 1.11 – 1.00 (m, 2H); <sup>13</sup>C NMR (100 MHz, CDCl<sub>3</sub>) δ 216.1, 215.3, 159.3, 136.2, 136.0, 134.4, 129.9, 129.7, 128.9, 128.5, 127.8, 126.8, 126.5, 117.7, 84.8, 66.2, 59.3, 43.8, 43.6, 43.2, 41.8, 28.7, 22.5, 21.7. IR: 3356, 2956, 2934, 2197, 1723, 1644, 1579, 1457, 1376, 1224, 1088, 748 cm<sup>-1</sup>. HRMS (TOF MS ES+) calcd. for [C<sub>26</sub>H<sub>24</sub>N<sub>2</sub>O<sub>2</sub>+Na]<sup>+</sup> [M + Na<sup>+</sup>] m/z 419.1730, found 419.1730.

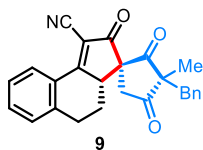

Compound **9** was prepared by general procedure for synthesis of triketone spirocyclic compound described above using **3a** (0.22 mmol, 87 mg) and purified by silica gel column chromatography (5→15% EtOAc: hexane) to provide pure compound as white solid (58 mg, 67%), melting point = 189-191 °C. **<sup>1</sup>H NMR** (400 MHz, CDCl<sub>3</sub>) δ 8.40 (d, *J* = 8.0 Hz, 1H), 7.53 (t, *J* = 7.6 Hz, 1H), 7.39 (t, *J* = 7.8 Hz, 1H), 7.28 – 7.27 (m, 4H), 7.05 – 7.03 (m, 2H), 3.23 (dd, *J* = 14.3, 4.3 Hz, 1H), 3.07 – 2.99 (m, 2H), 2.91 – 2.80 (m, 2H), 2.72 (d, *J* = 18.7 Hz, 1H), 1.91 (d, *J* = 18.7 Hz, 1H), 1.43 (s, 3H), 1.26 – 1.19 (m, 1H), 0.77 – 0.71 (m, 1H); **<sup>13</sup>C NMR** (100 MHz, CDCl<sub>3</sub>) δ 214.1, 213.4, 199.4, 182.7, 141.4, 136.3, 134.9, 130.2, 130.0, 129.2, 128.9, 127.9, 127.6 (2×C), 113.1, 105.2, 66.3, 59.3, 46.4, 43.7, 42.5, 29.8, 25.9, 20.8. **IR**: 3055, 2982, 2926, 2855, 2303, 1763, 1730, 1688, 1578, 1432, 1266, 890, 706 cm<sup>-1</sup>. **HRMS** (TOF MS ES<sup>+</sup>) calcd. for [C<sub>26</sub>H<sub>21</sub>N<sub>2</sub>O<sub>3</sub>+H]<sup>+</sup> [M + H<sup>+</sup>] *m/z* 396.1594, found 396.1589.

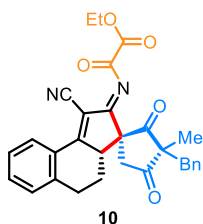

Compound **10** was prepared by general procedure for synthesis of *N*-protected carbospirocycle described above using **3a** (0.22 mmol, 87 mg) and purified by crystallization technique to provide pure compound as white solid (85 mg, 78%), melting point = 101-103 °C. **<sup>1</sup>H NMR** (400 MHz, CDCl<sub>3</sub>) δ 8.30 (d, *J* = 8.0 Hz, 1H), 7.52 (t, *J* = 7.5 Hz, 1H), 7.35 (t, *J* = 7.9 Hz, 1H), 7.29 – 7.20 (m, 4H), 7.08 – 7.03 (m, 2H), 4.35 (q, *J* = 7.2 Hz, 2H), 3.21 (dd, *J* = 14.2, 4.3 Hz, 1H), 3.03 (q, *J* = 12.8 Hz, 2H), 2.91 – 2.76 (m, 3H), 2.00 (d, *J* = 18.6 Hz, 1H), 1.45 (s, 3H), 1.36 (t, *J* = 7.1 Hz, 3H), 1.22 – 1.14 (m, 1H), 0.71 – 0.66 (m, 1H); **<sup>13</sup>C NMR** (100 MHz, CDCl<sub>3</sub>) δ 214.1, 213.5, 179.3, 173.5, 165.3, 158.6, 141.5, 136.1, 134.9, 130.2, 129.9, 128.9, 128.5, 127.7 (2×C), 127.5, 113.6, 100.3, 63.7, 63.6, 59.0, 47.6, 44.5, 44.3, 29.8, 25.9, 21.5, 14.0. **IR**: 3266, 2978, 2917, 2223, 1765, 1727, 1708, 1584, 1453, 1269, 1232, 1082, 821 cm<sup>-1</sup>. **HRMS** (TOF MS ES<sup>+</sup>) calcd. for [C<sub>30</sub>H<sub>26</sub>N<sub>2</sub>O<sub>5</sub>+Na]<sup>+</sup> [M + Na<sup>+</sup>] *m/z* 517.1734, found 517.1727.

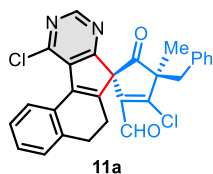

Compound **11a** was prepared by general procedure for synthesis of pyrimidine fused spirocycles described above using **3a** (0.22 mmol, 87 mg) and purified by silica gel column chromatography (10→25% EtOAc: hexane) to provide pure compound as white solid (59 mg, 55%). **<sup>1</sup>H NMR** (400 MHz, CDCl<sub>3</sub>) δ 9.99 (s, 1H), 8.63 (s, 1H), 7.90 (d, *J* = 7.7 Hz, 1H), 7.30 – 7.26 (m, 4H), 7.23 – 7.19 (m, 3H), 7.13 (d, *J* = 7.5 Hz, 1H), 3.26 (d, *J* = 13.9 Hz, 1H), 3.13 (d, *J* = 13.9 Hz, 1H), 2.43 – 2.37 (m, 2H), 1.76 (s, 3H), 1.07 – 0.99 (m, 1H), 0.68 – 0.59 (m, 1H); **IR**: 3067, 2958, 2843, 1755, 1728, 1629, 1589, 1453, 1328, 1264, 1088, 745 cm<sup>-1</sup>. **<sup>13</sup>C NMR** (100 MHz, CDCl<sub>3</sub>) δ 206.7, 184.5, 174.7, 158.8, 154.0, 150.1, 148.1, 137.0, 136.8, 135.7, 135.3, 133.3, 130.7, 129.6, 129.0, 127.9, 127.6 (2×C), 127.4, 126.1, 73.6, 63.9, 40.8, 29.0, 24.2, 20.5. **IR**: 2906, 2813, 2217, 1766, 1730, 1634, 1579, 1437, 1330, 1224, 1143, 854 cm<sup>-1</sup>. **HRMS** (TOF MS ES<sup>+</sup>) calcd. for [C<sub>28</sub>H<sub>20</sub>N<sub>2</sub>O<sub>2</sub>Cl<sub>2</sub>+Na]<sup>+</sup> [M + Na<sup>+</sup>] *m/z* 509.0794, found 509.0792.

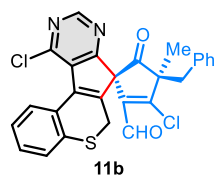

Compound **11b** was prepared by general procedure for synthesis of pyrimidine fused spirocycles described above using **3ao** (0.22 mmol, 90 mg) and purified by silica gel column chromatography (10→25% EtOAc: hexane) to provide pure compound as white solid (58 mg, 52%), melting point = 135-137 °C. **<sup>1</sup>H NMR** (400 MHz, CDCl<sub>3</sub>) δ 10.01 (s, 1H), 8.65 (s, 1H), 7.83 (d, *J* = 7.6 Hz, 1H), 7.36 – 7.31 (m, 4H), 7.25 – 7.19 (m, 4H), 3.29 (d, *J* = 13.9 Hz, 1H), 3.16 (d, *J* = 13.9 Hz, 1H), 2.15 (d, *J* = 15.9 Hz, 1H), 1.76 (s, 3H), 1.19 (d, *J* = 15.9 Hz, 1H); **<sup>13</sup>C NMR** (100 MHz, CDCl<sub>3</sub>) δ 206.1, 184.4, 174.0, 159.2, 154.5, 150.9, 142.4, 137.7, 135.7, 134.5, 134.1, 132.6, 130.7, 129.2, 129.0, 128.9, 128.5, 128.4, 127.9, 125.4, 73.6, 64.4, 40.9, 24.2, 22.5. **HRMS** (TOF MS ES+) calcd. for [C<sub>27</sub>H<sub>18</sub>N<sub>2</sub>O<sub>2</sub>Cl<sub>2</sub>S+H]<sup>+</sup> [*M* + H<sup>+</sup>] *m/z* 505.0539, found 505.0521.

# **NMR SPECTRA**



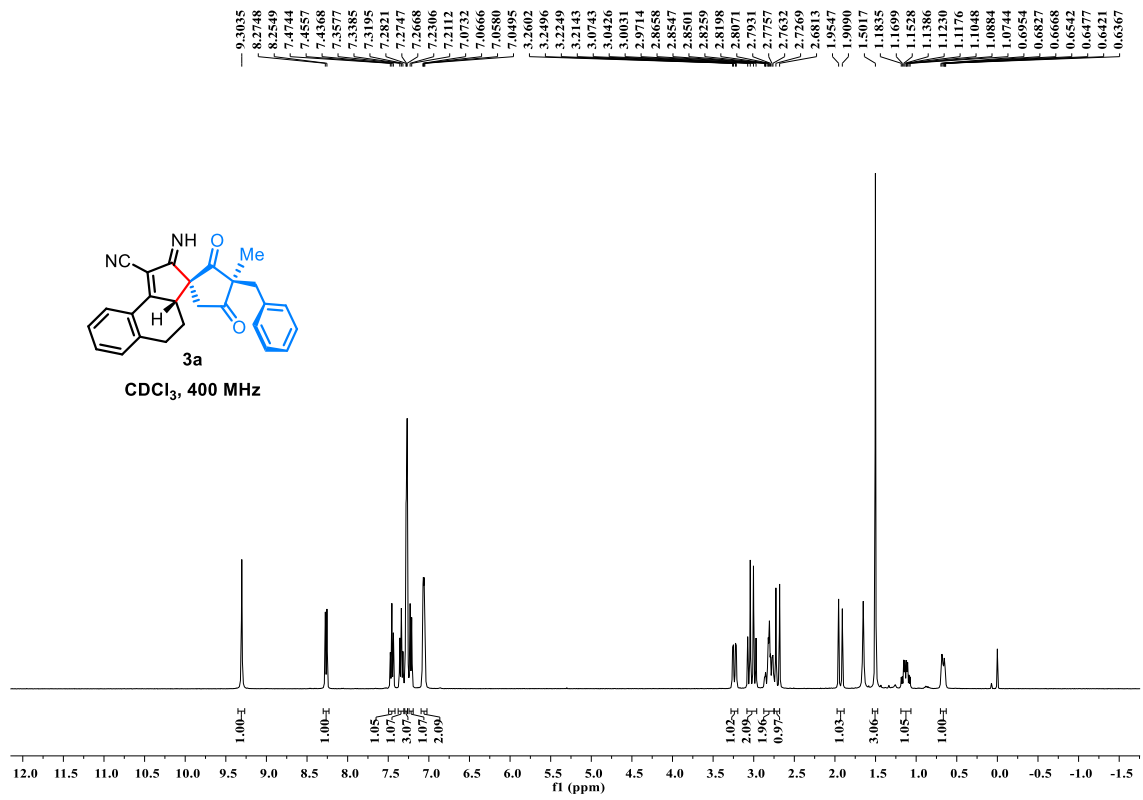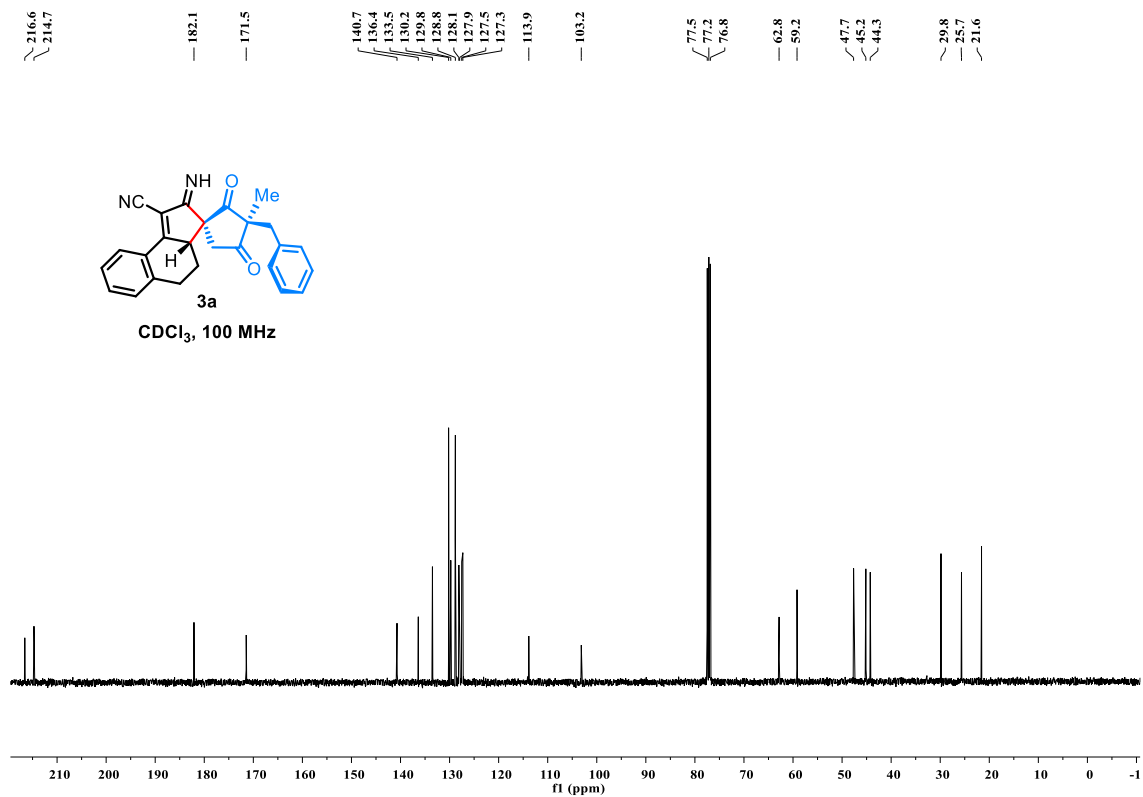

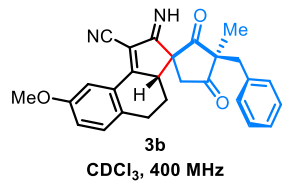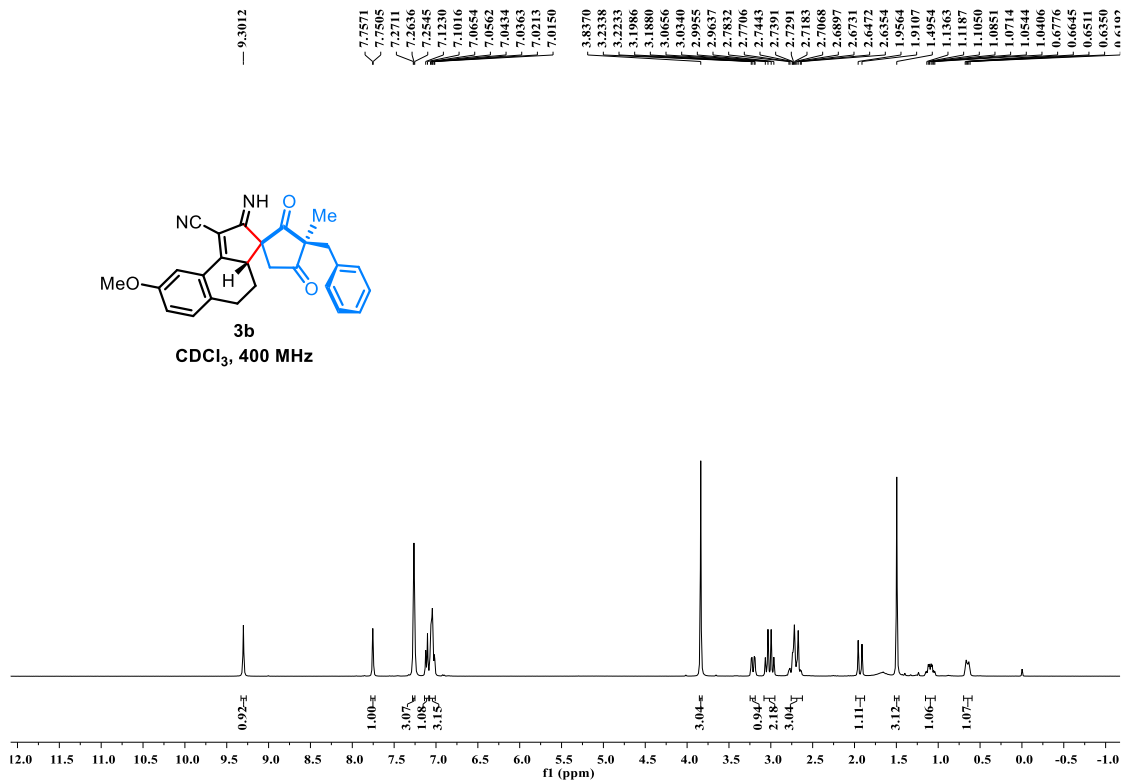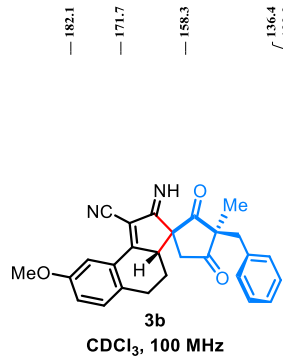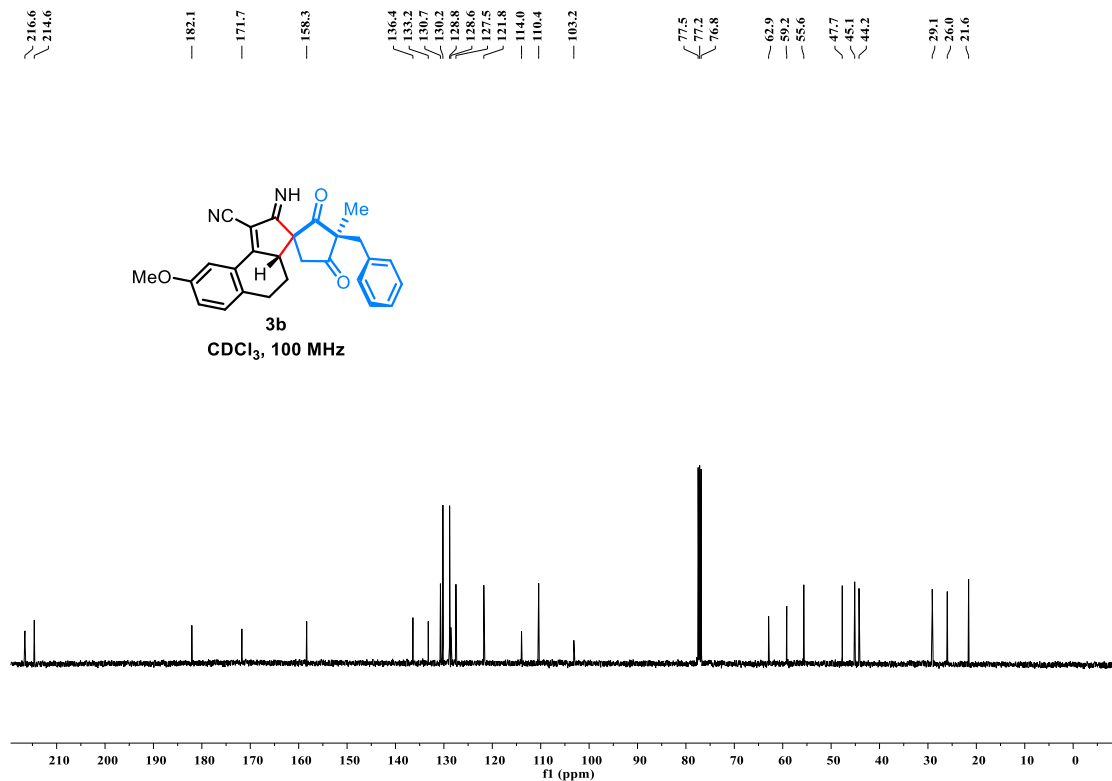

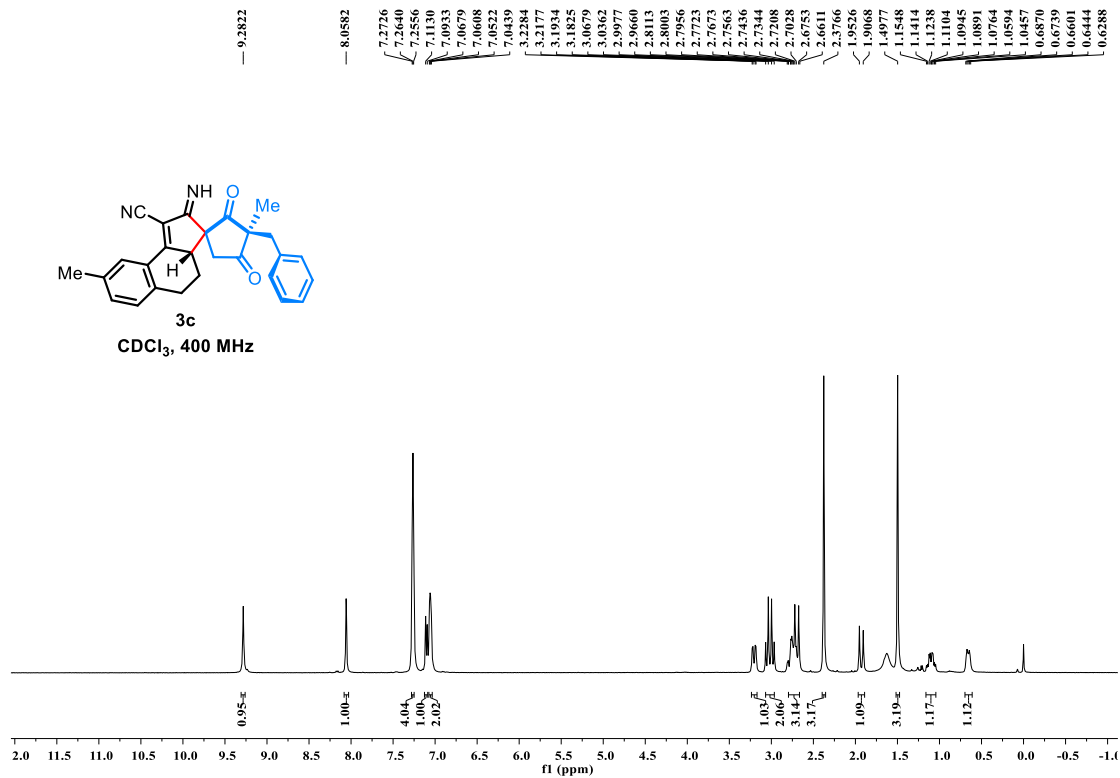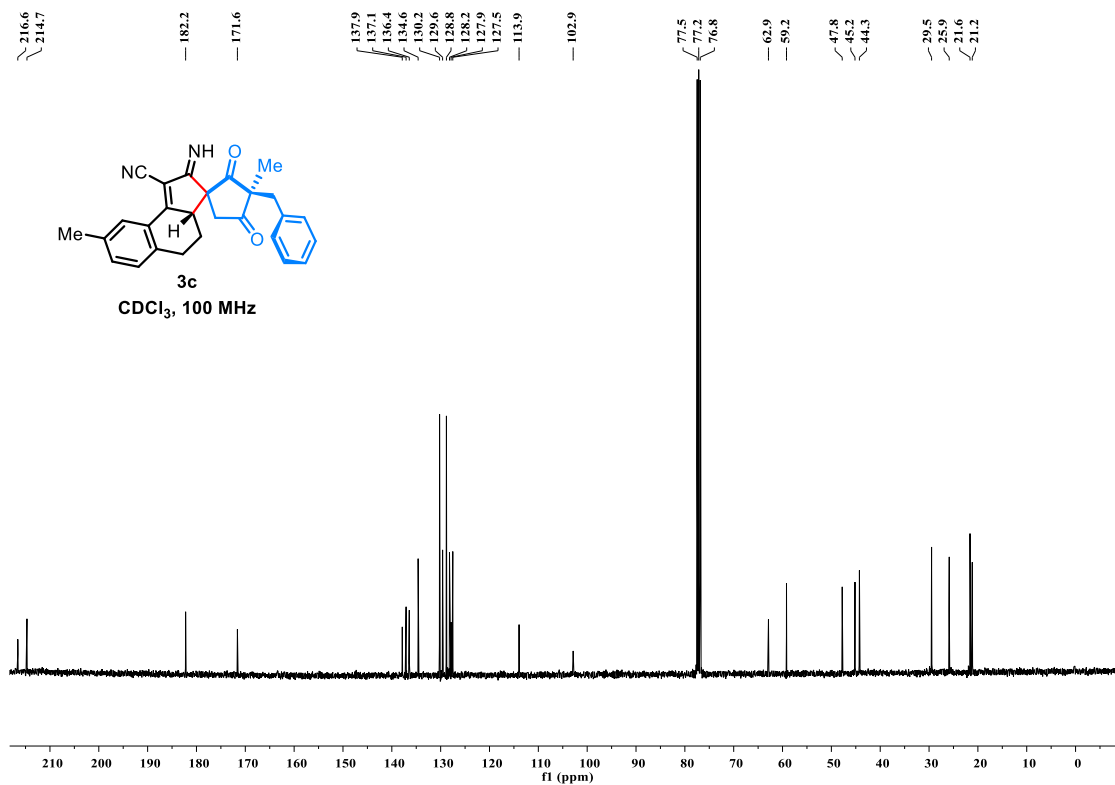

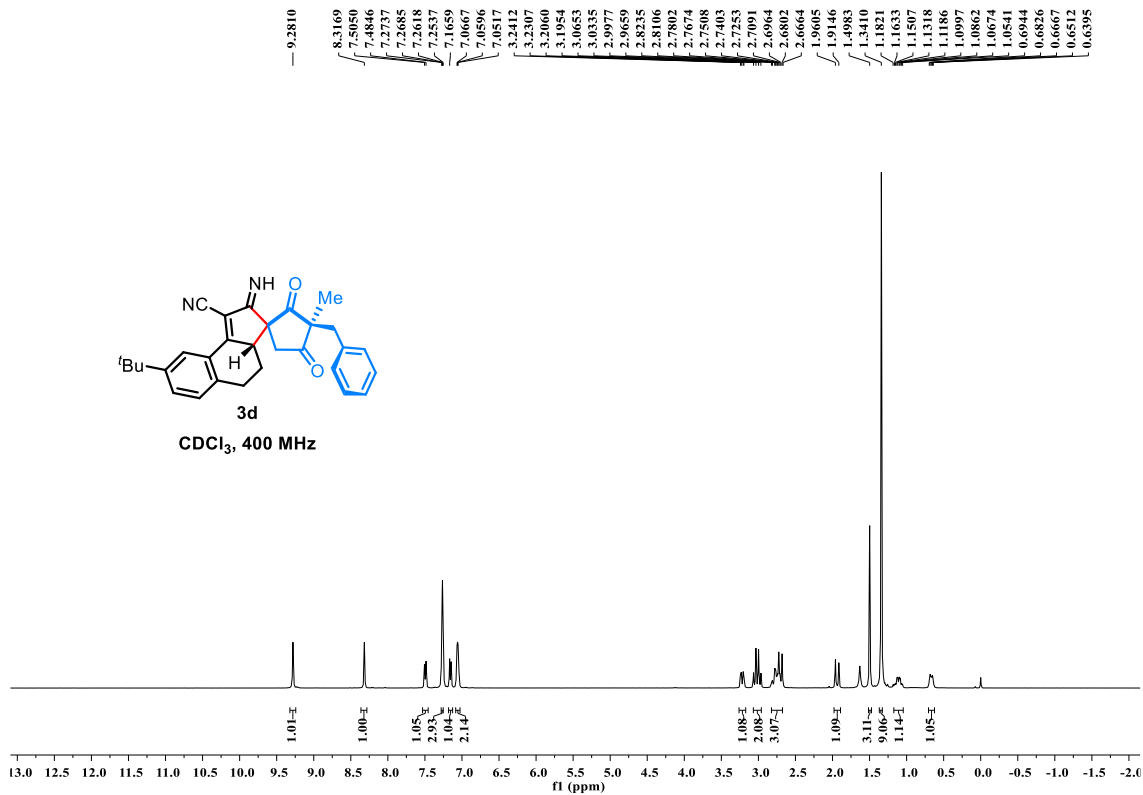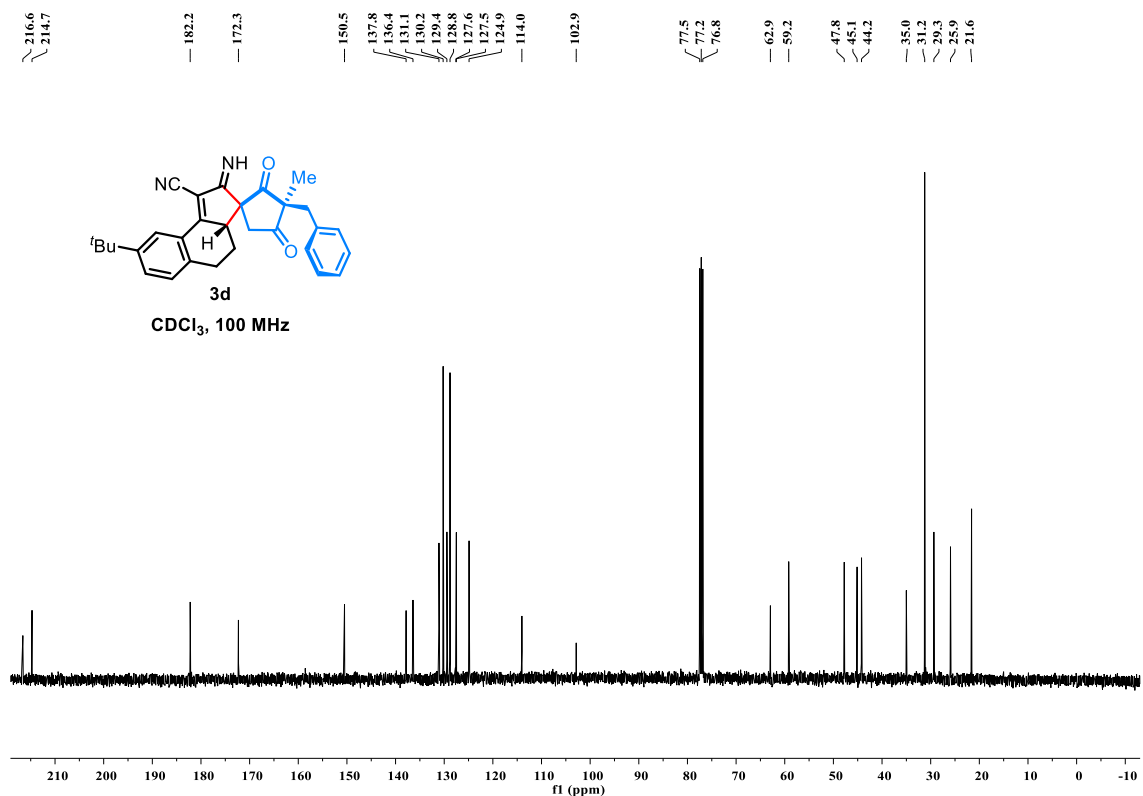

9.3025  
8.2695  
8.2537  
7.4643  
7.4617  
7.4489  
7.4464  
7.4340  
7.4315  
7.3461  
7.3308  
7.3156  
7.2837  
7.2759  
7.2703  
7.2667  
7.2631  
7.2581  
7.2542  
7.2244  
7.2089  
7.0677  
7.0627  
7.0556  
7.0485  
3.2487  
3.2402  
3.2205  
3.2130  
3.1978  
3.1928  
2.9940  
2.9704  
2.8550  
2.8505  
2.8442  
2.8399  
2.8202  
2.8157  
2.8093  
2.8051  
2.7936  
2.7842  
2.7696  
2.7193  
1.9574  
1.9209  
1.4958  
1.1687  
1.1582  
1.1445  
1.1404  
1.1339  
1.1299  
1.1204  
1.1163  
1.1096  
1.1056  
1.0922  
1.0815  
0.9949  
0.6850  
0.6816  
0.6768  
0.6718  
0.6668  
0.6620  
0.6573  
0.6525

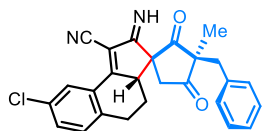

3e  
CDCl<sub>3</sub>, 500 MHz

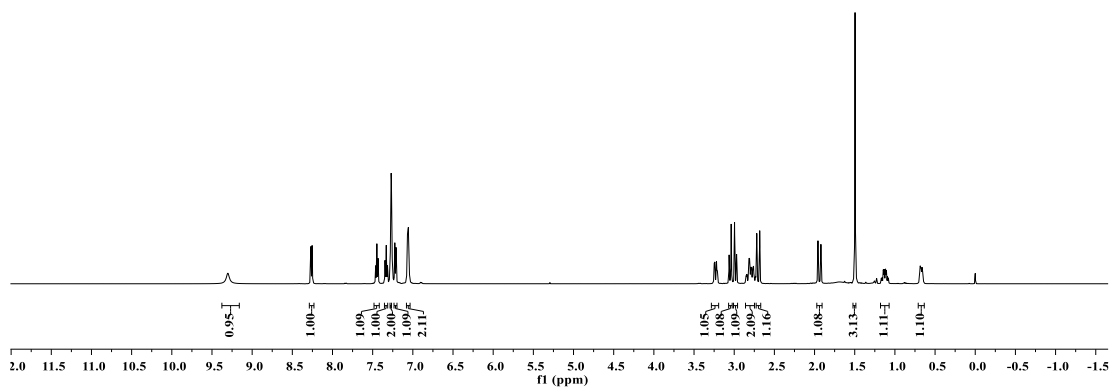

216.5  
214.6  
182.1  
171.4  
140.7  
136.4  
133.5  
130.2  
129.7  
128.8  
128.1  
128.0  
127.5  
127.3  
113.8  
103.2  
77.4  
77.2  
76.9  
62.8  
59.2  
47.7  
45.1  
44.2  
29.8  
25.7  
21.6

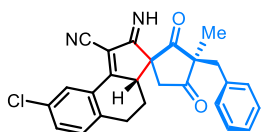

3e  
CDCl<sub>3</sub>, 125 MHz

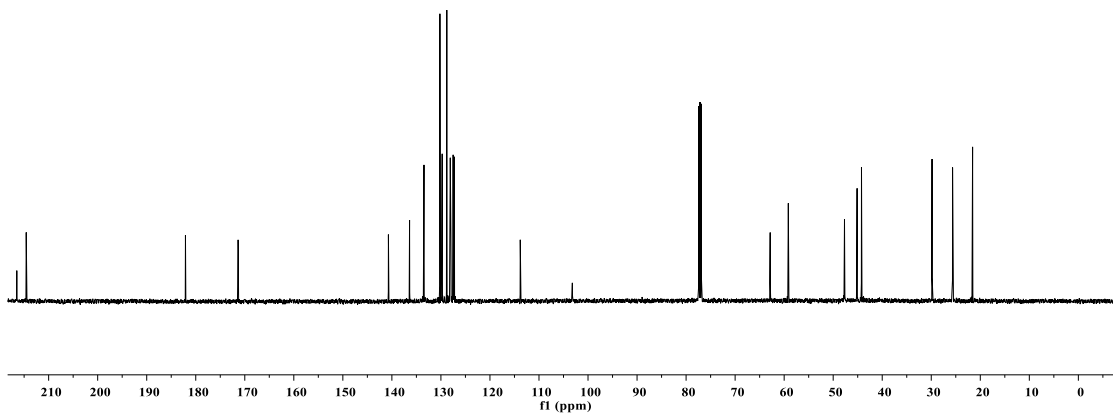

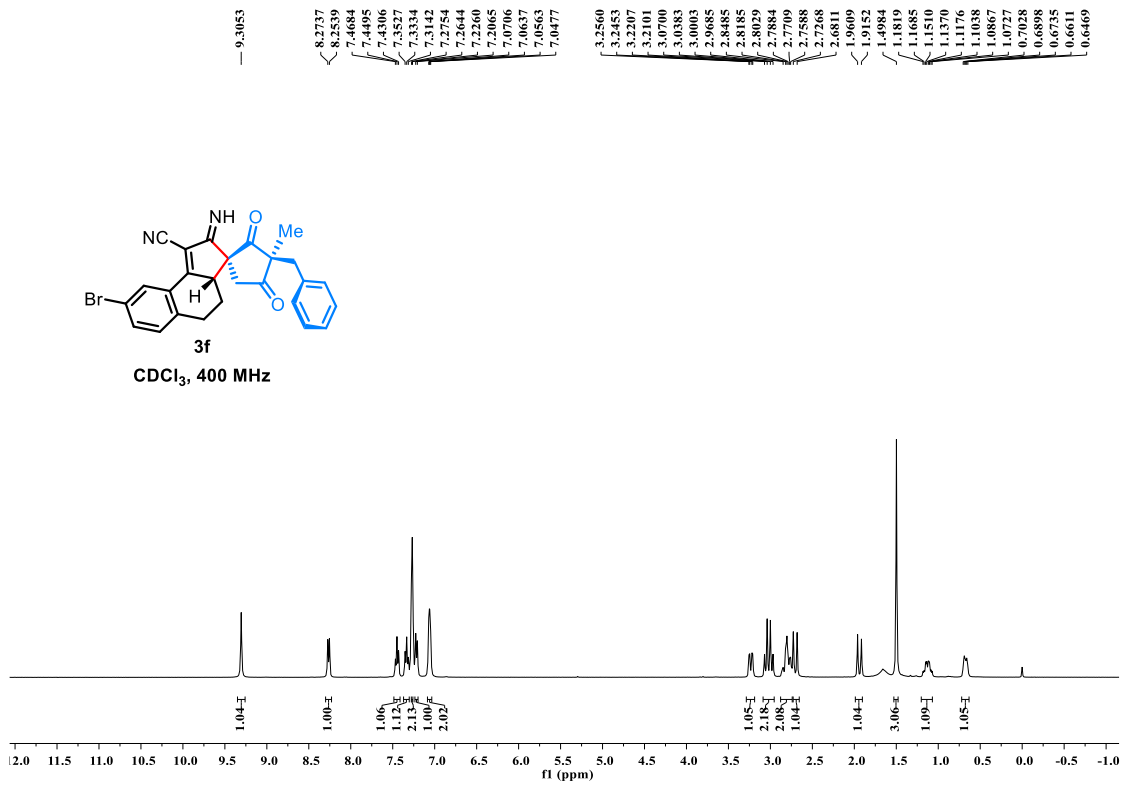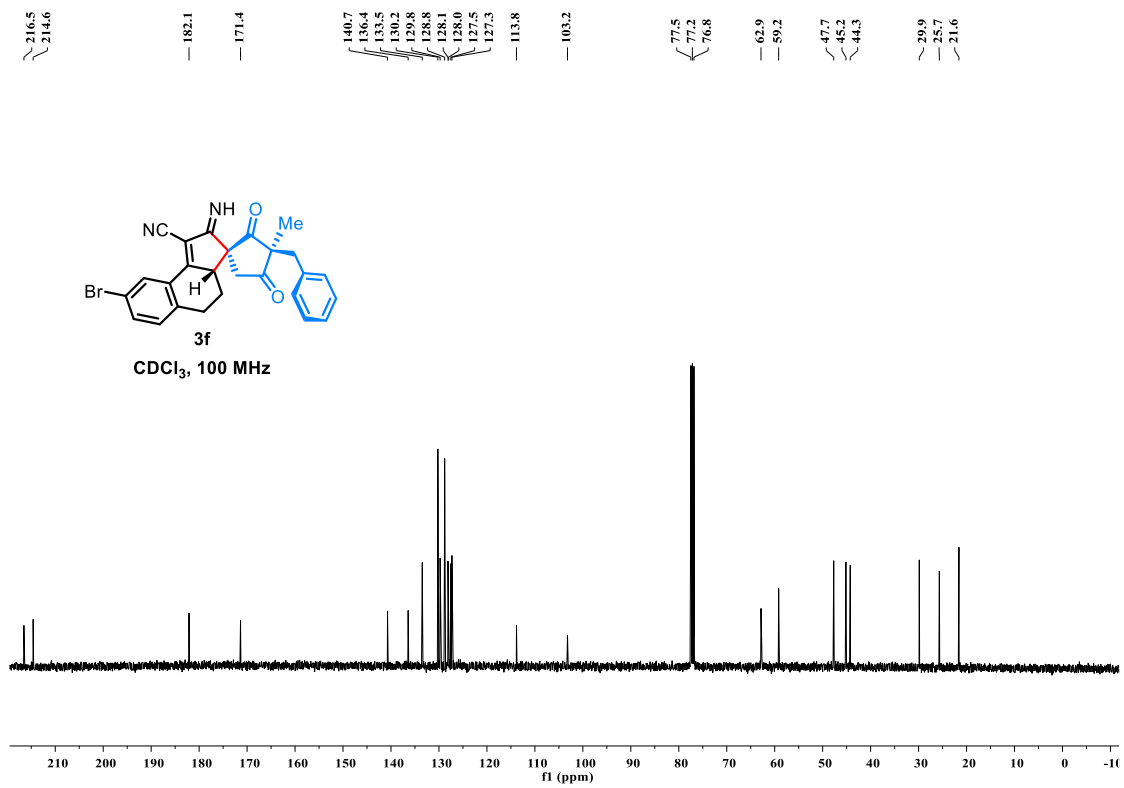

9.2750  
8.2703  
8.2546  
7.4713  
7.4564  
7.4413  
7.3555  
7.3403  
7.3251  
7.2363  
7.2208  
7.1697  
7.1669  
7.1599  
7.1575  
7.1546  
7.1441  
7.1036  
7.0985  
7.0883  
7.0828  
7.0762  
7.0707  
6.9973  
6.9822  
3.2351  
3.2345  
3.2290  
3.1826  
3.1122  
3.0963  
3.0698  
2.8775  
2.8731  
2.8547  
2.8498  
2.8428  
2.8386  
2.8328  
2.8191  
2.8091  
2.6806  
2.6451  
2.2662  
2.0279  
1.9922  
1.5049  
1.2055  
1.1942  
1.1815  
1.1771  
1.1700  
1.1658  
1.1578  
1.1533  
1.1461  
1.1417  
1.1297  
0.8629  
0.8581  
0.8535  
0.8489  
0.8444  
0.8393  
0.8336  
0.8294  
0.8244  
0.8203  
0.8155

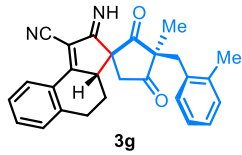

$\text{CDCl}_3$ , 500 MHz

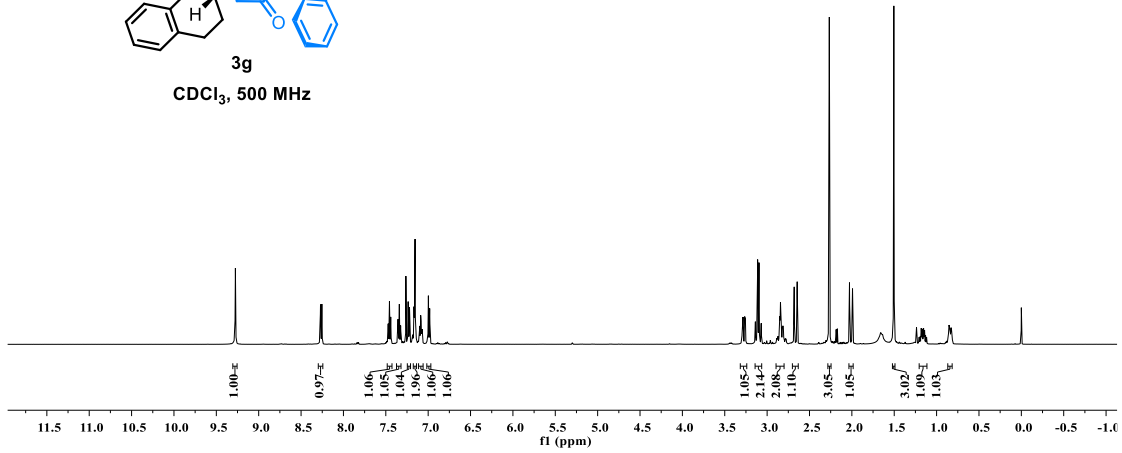

216.7  
214.6  
182.2  
171.7  
140.7  
137.5  
134.9  
133.5  
131.4  
130.8  
129.8  
128.1  
128.0  
127.7  
126.0  
115.8  
103.2  
77.4  
77.2  
76.9  
63.0  
58.6  
47.5  
45.1  
41.1  
29.9  
25.8  
21.7  
19.8

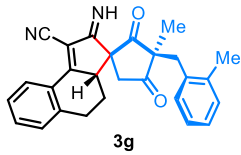

$\text{CDCl}_3$ , 125 MHz

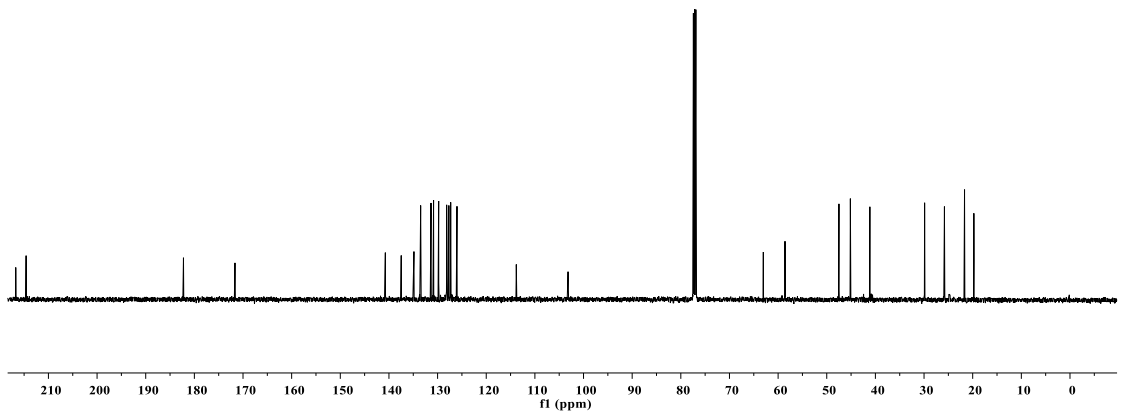

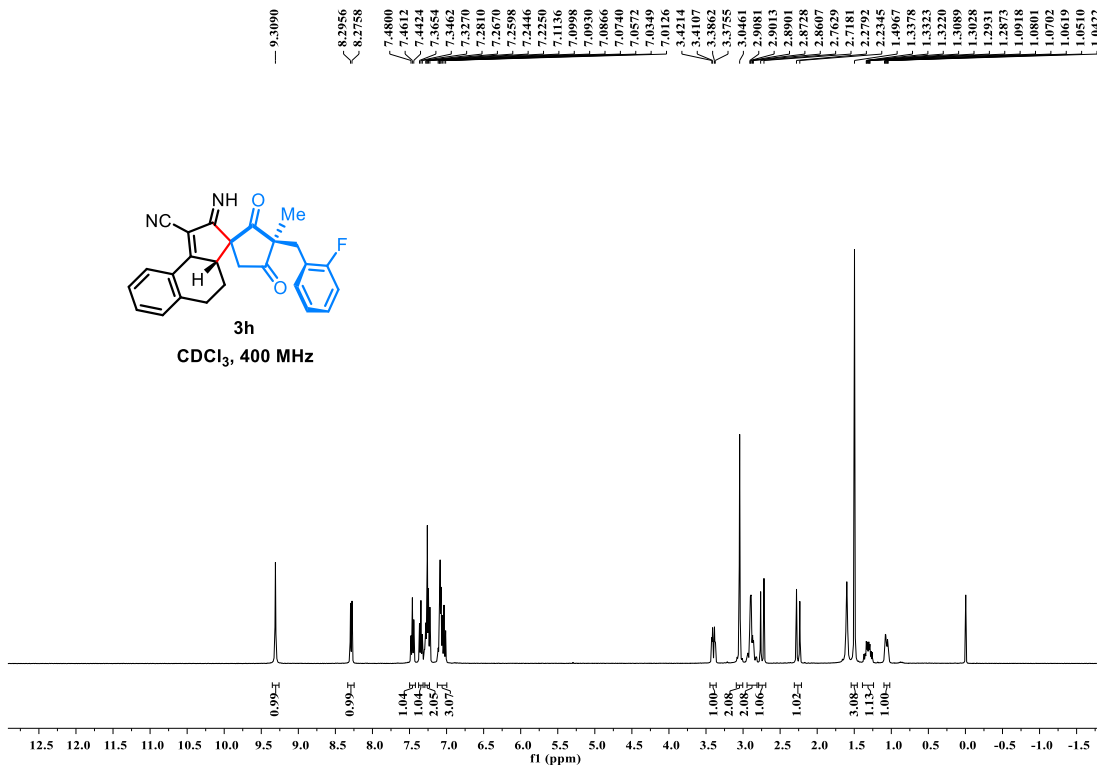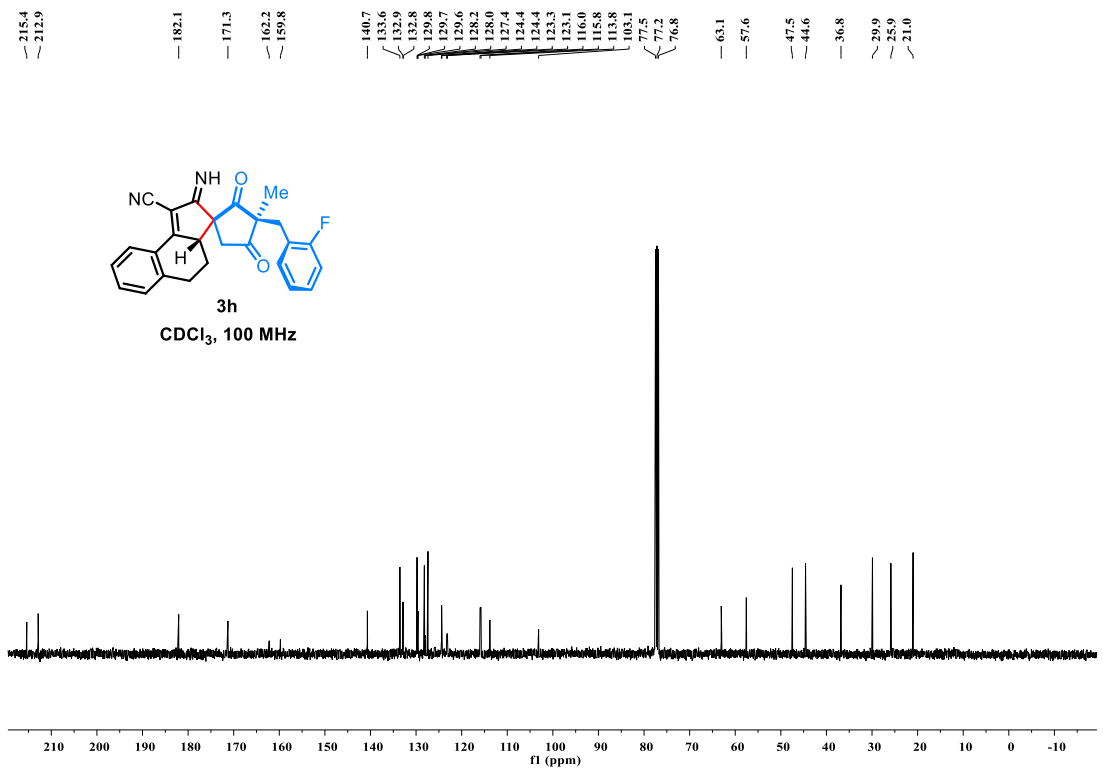



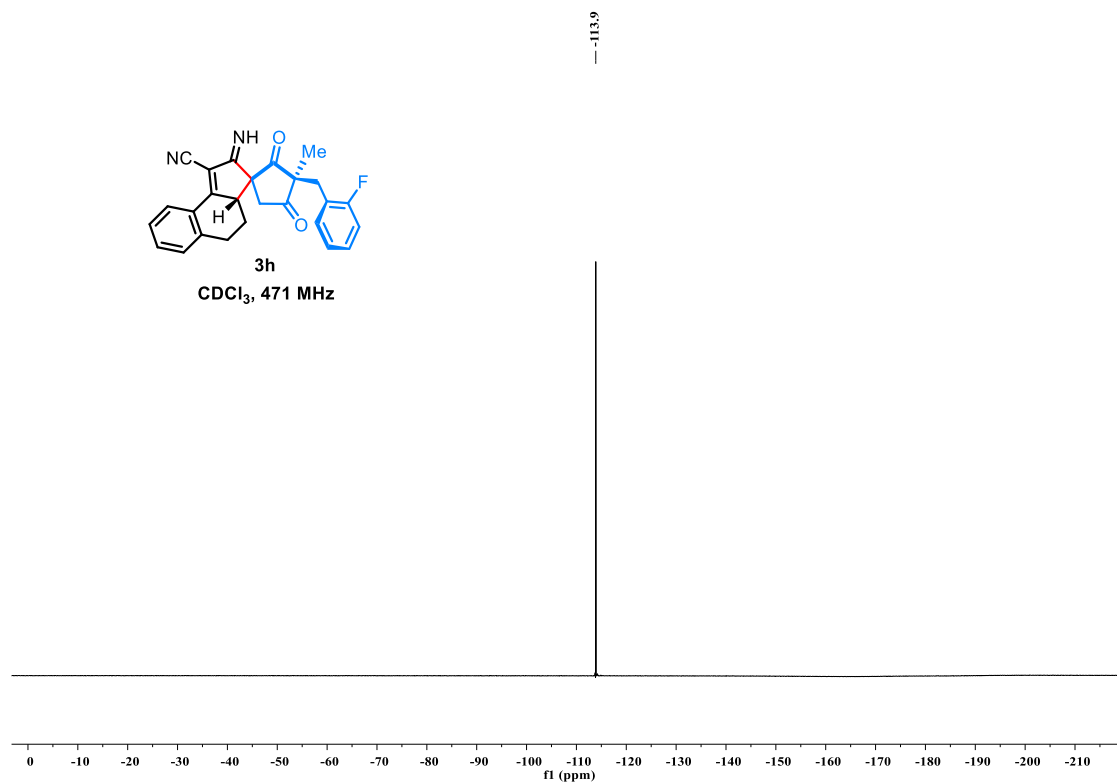

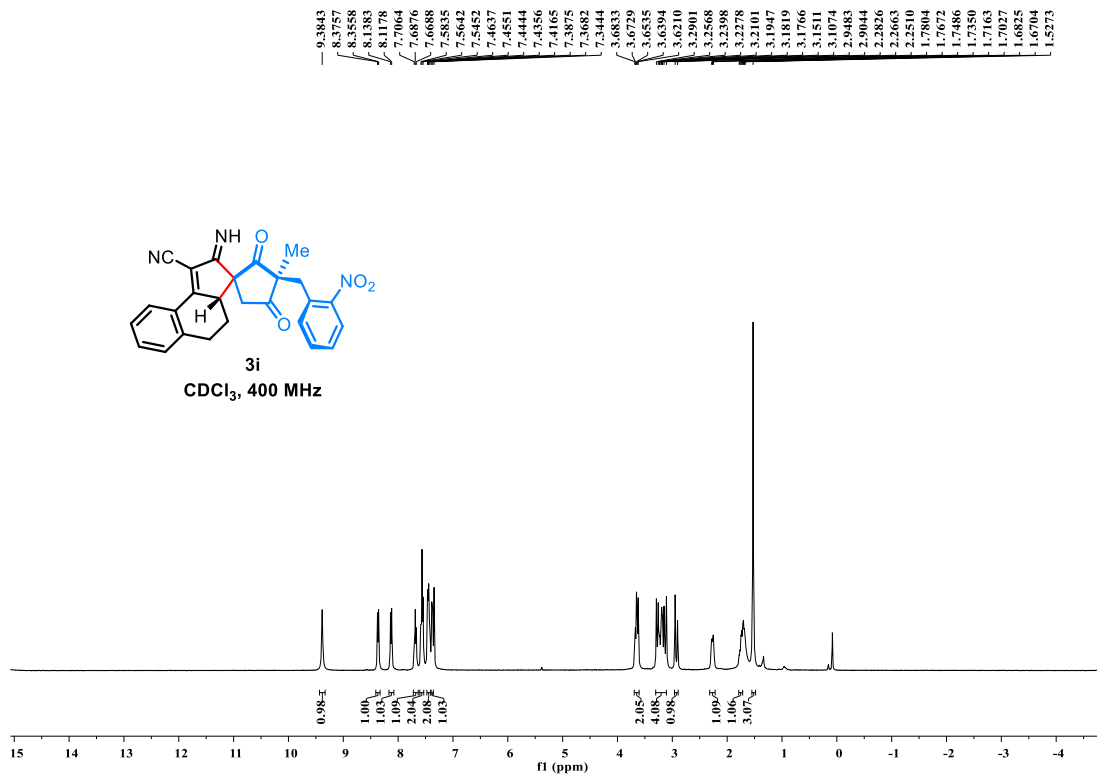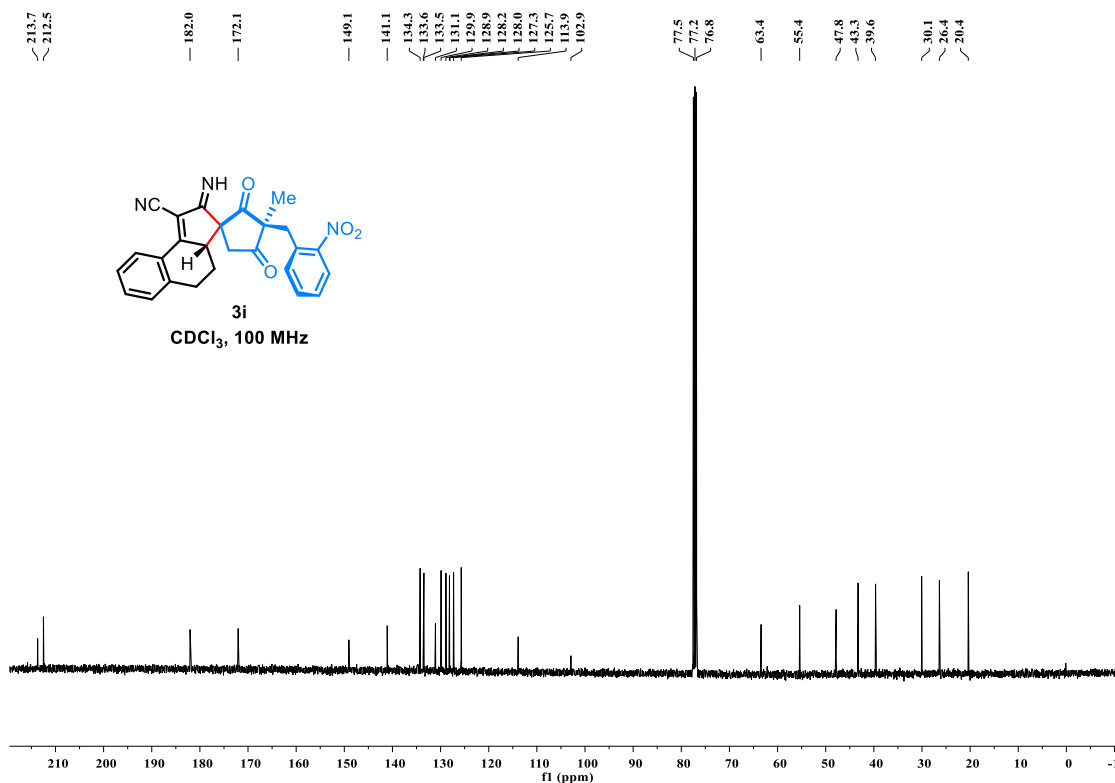

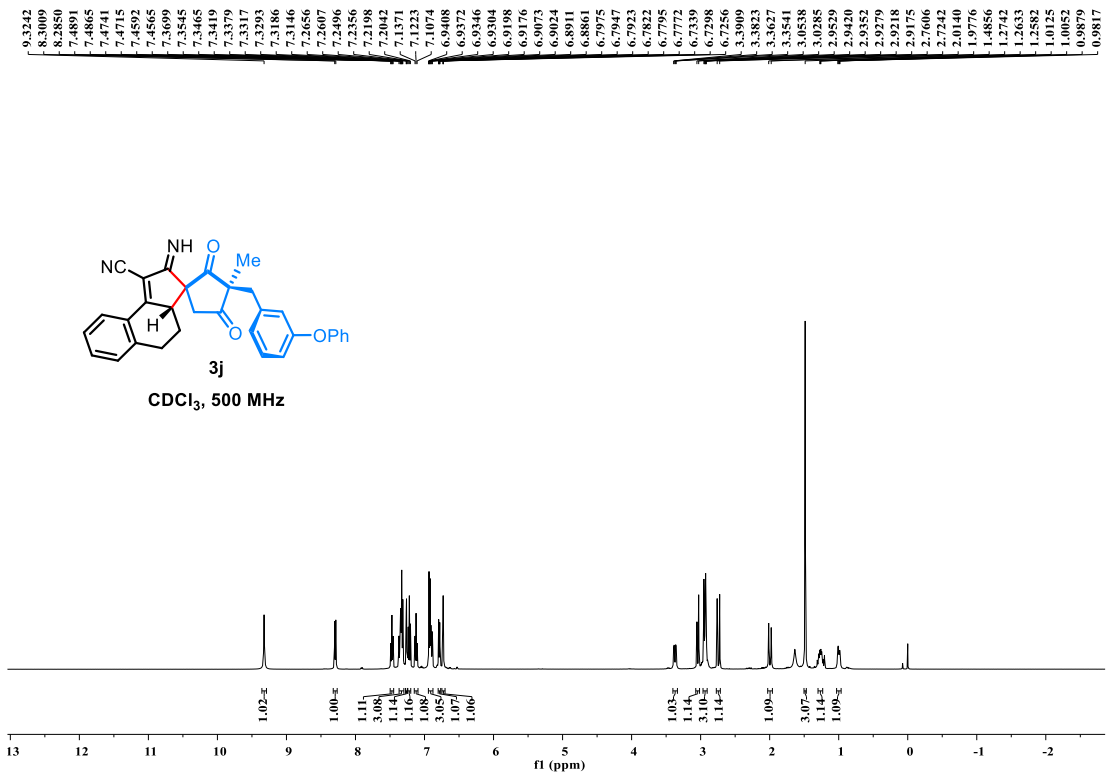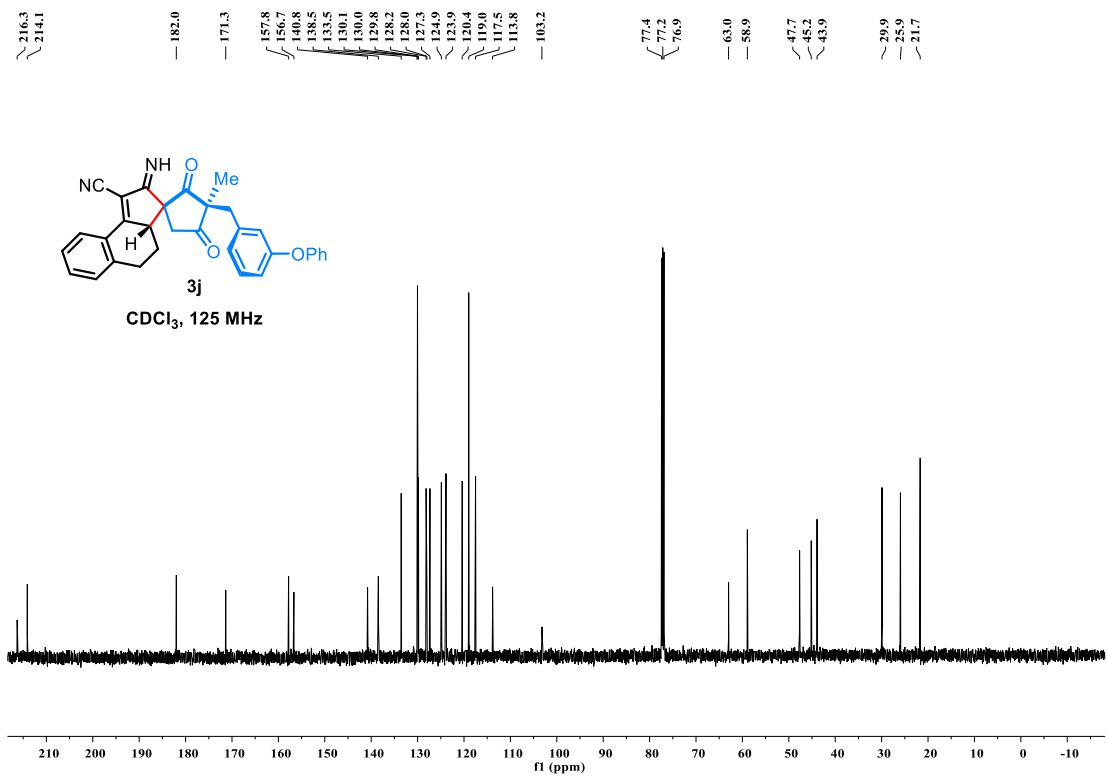

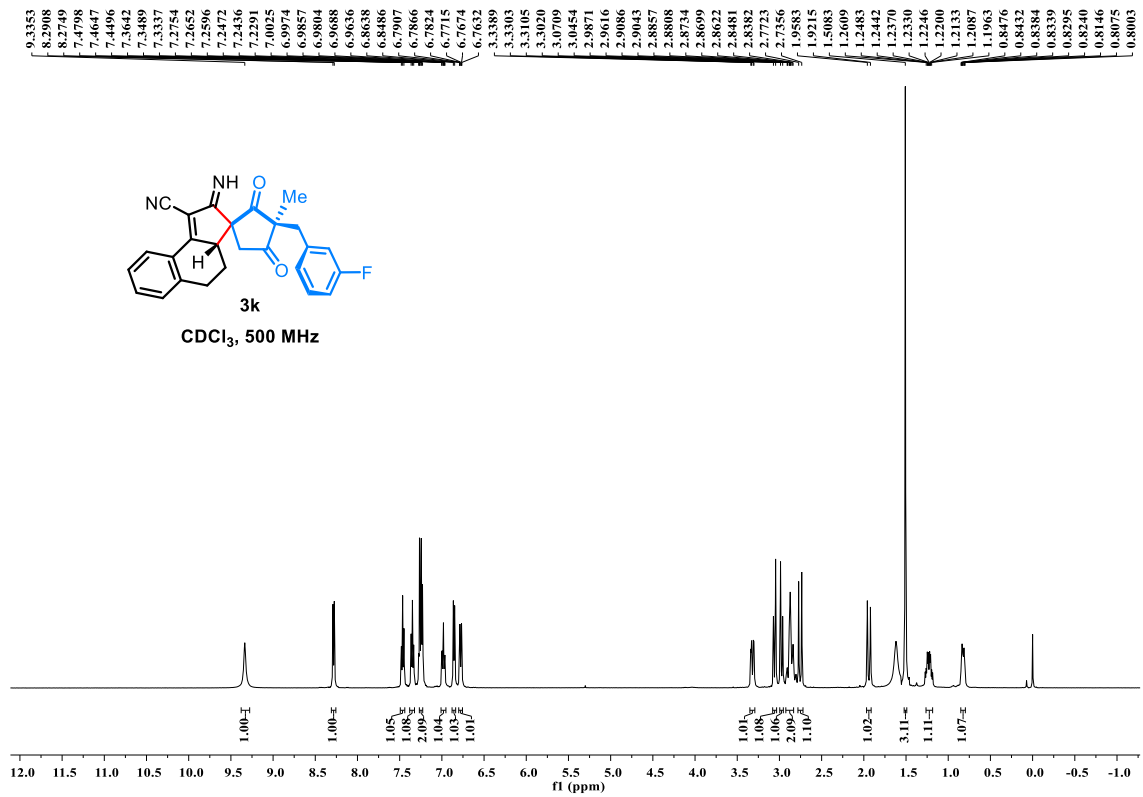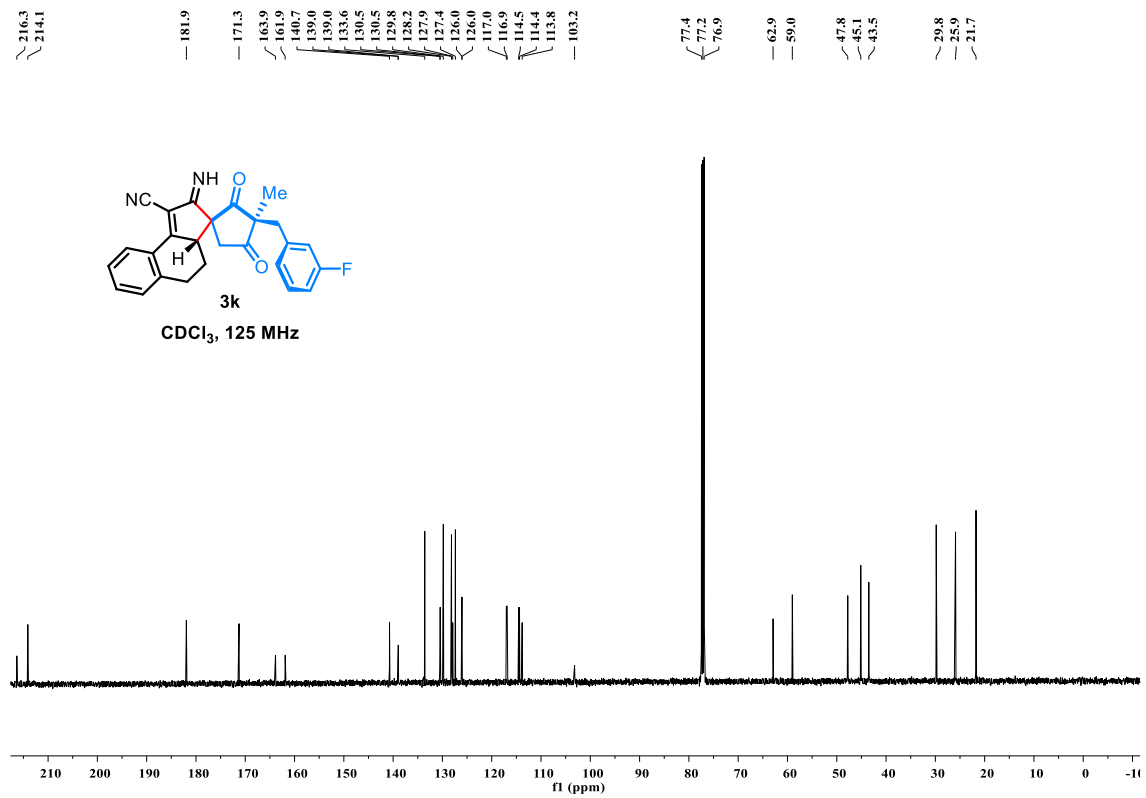

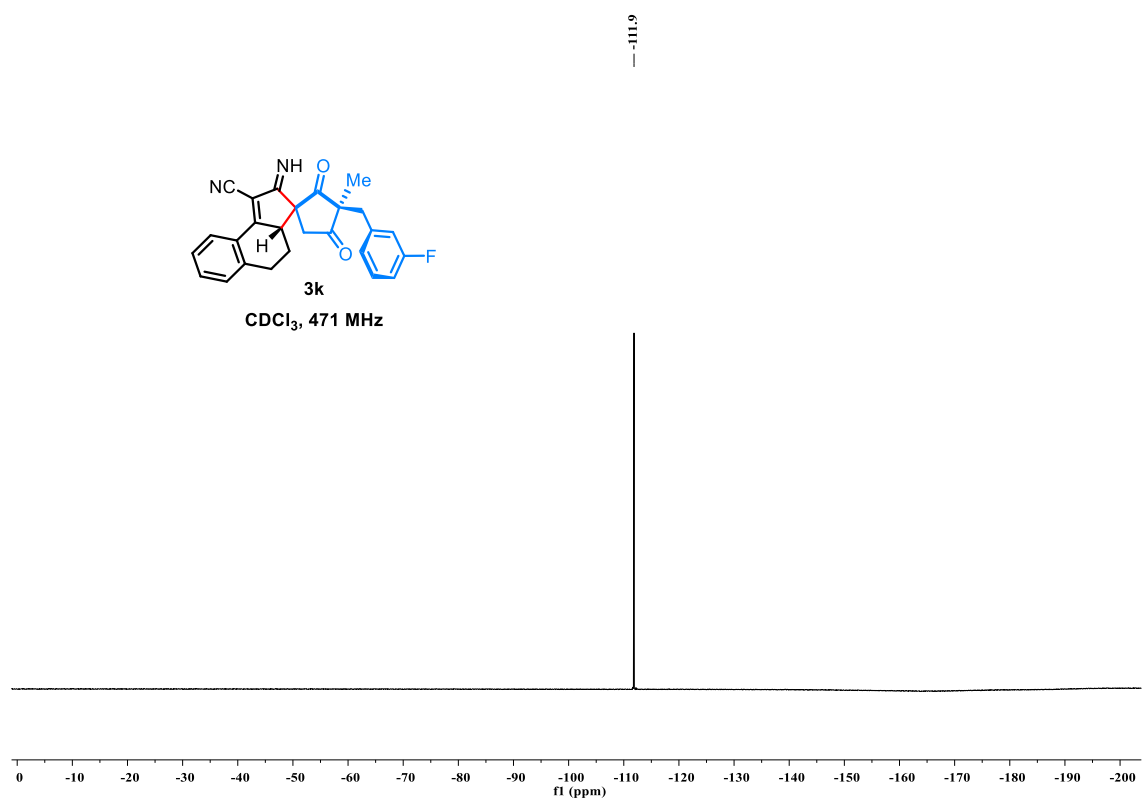

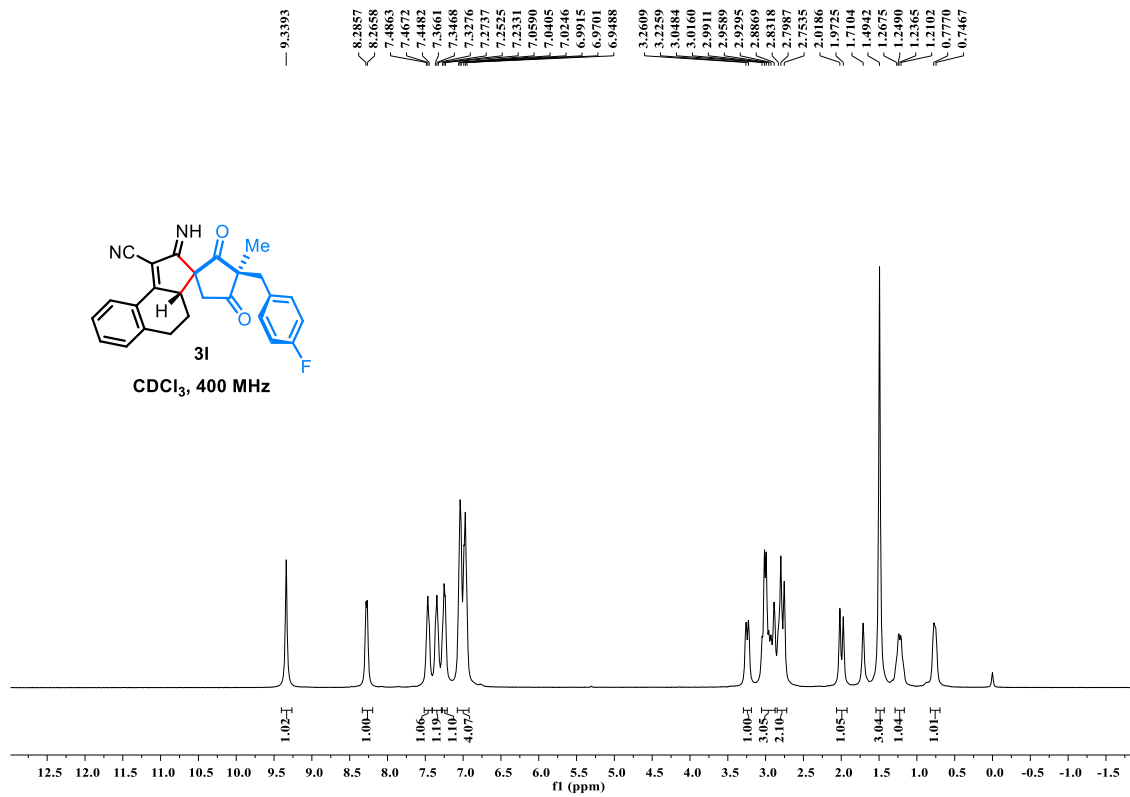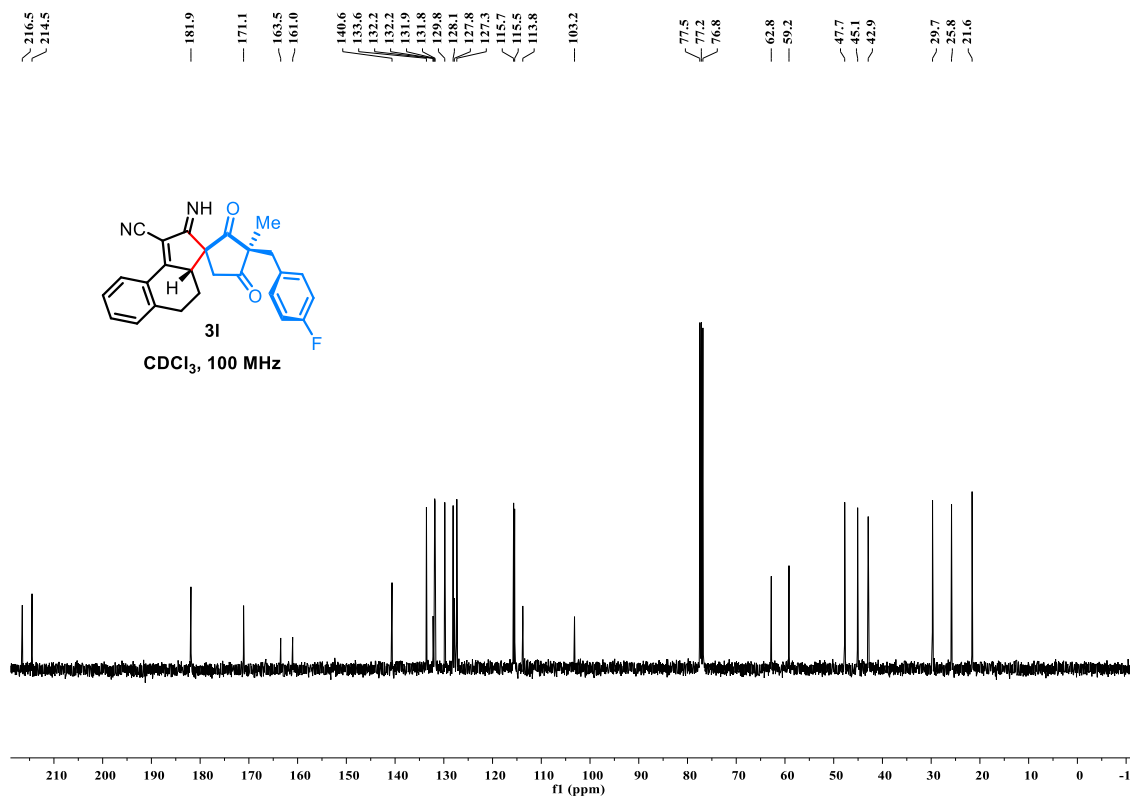

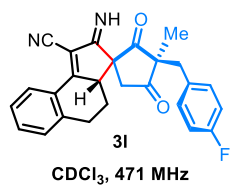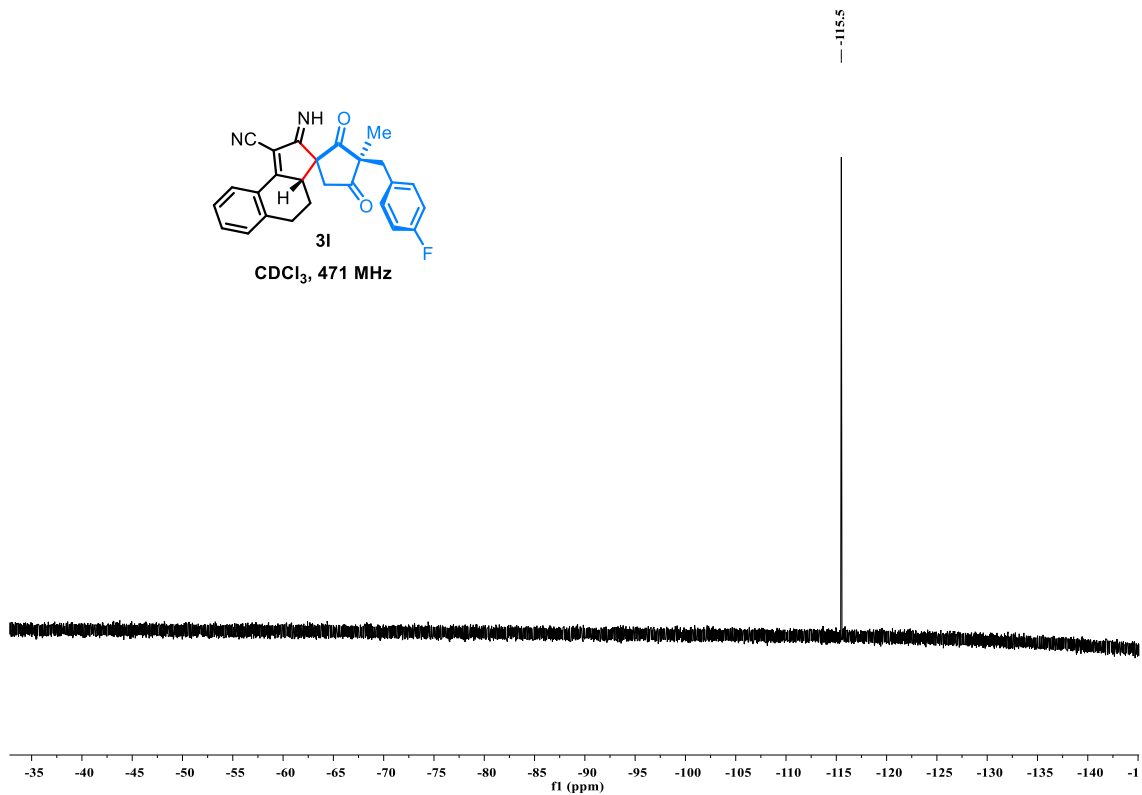

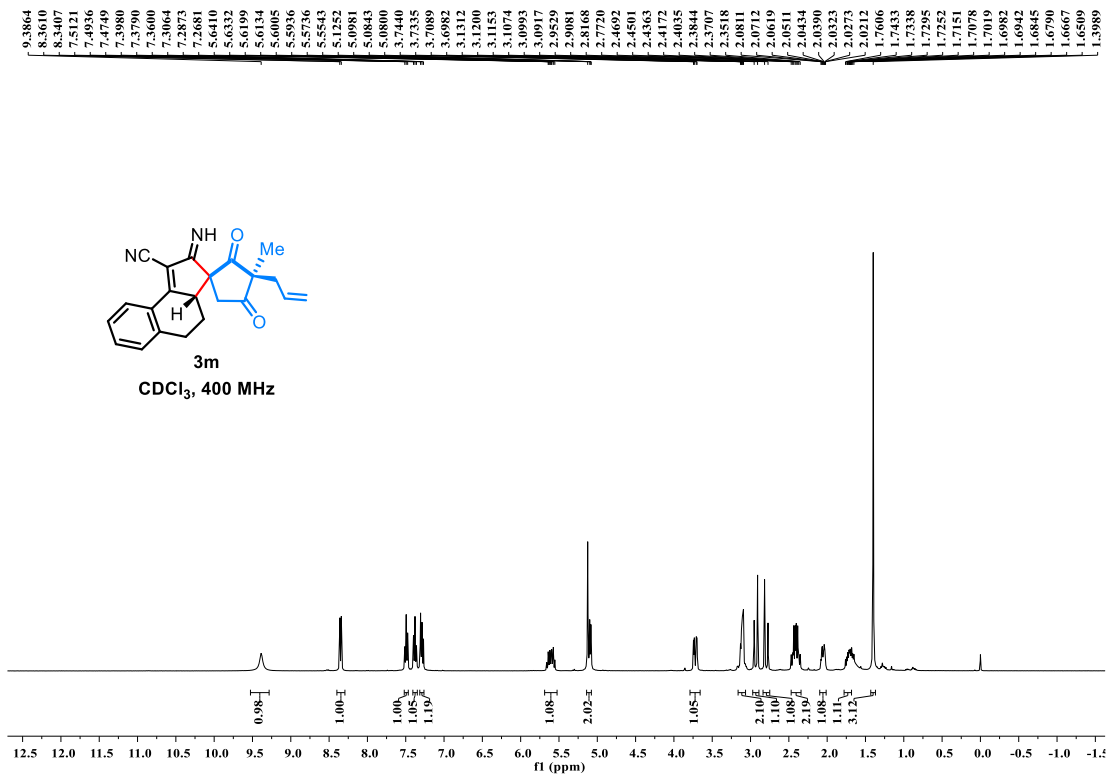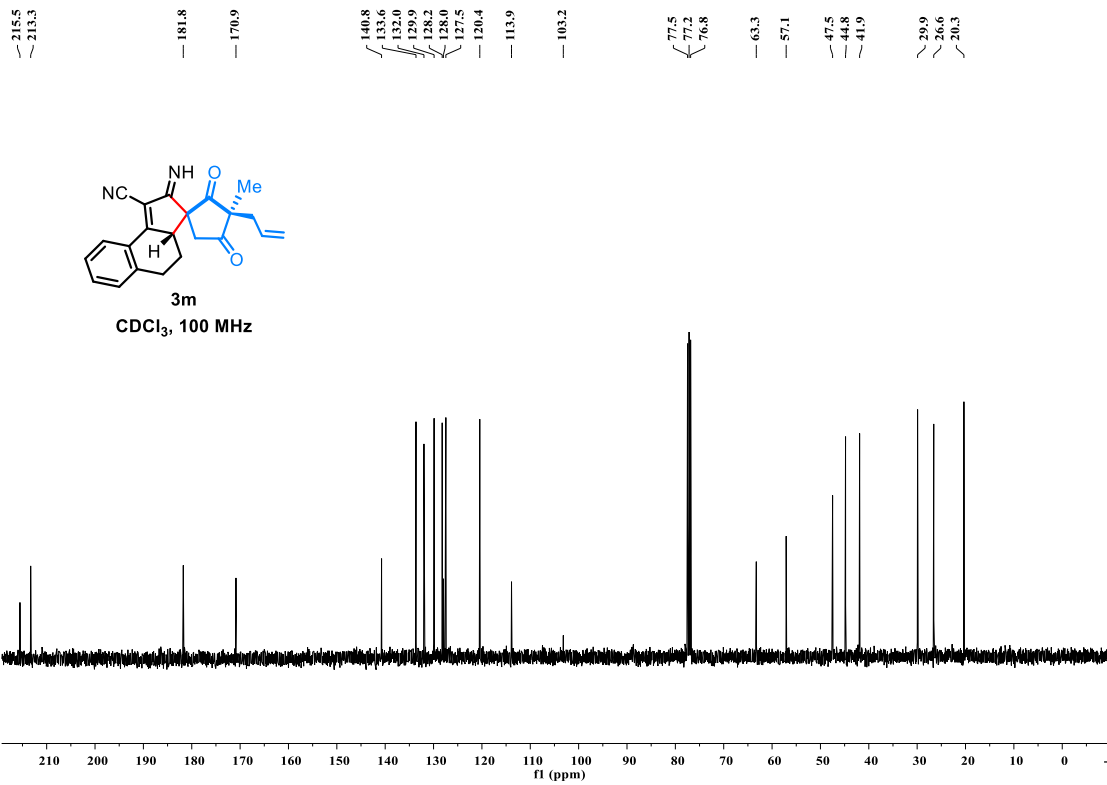



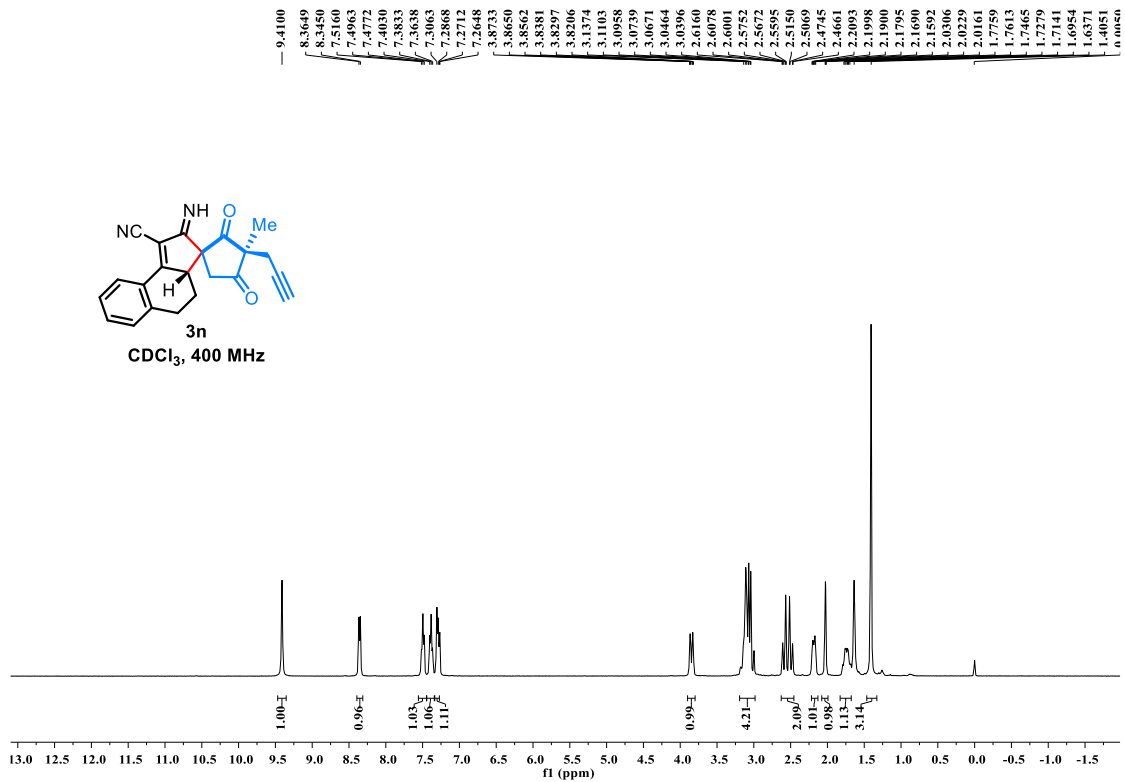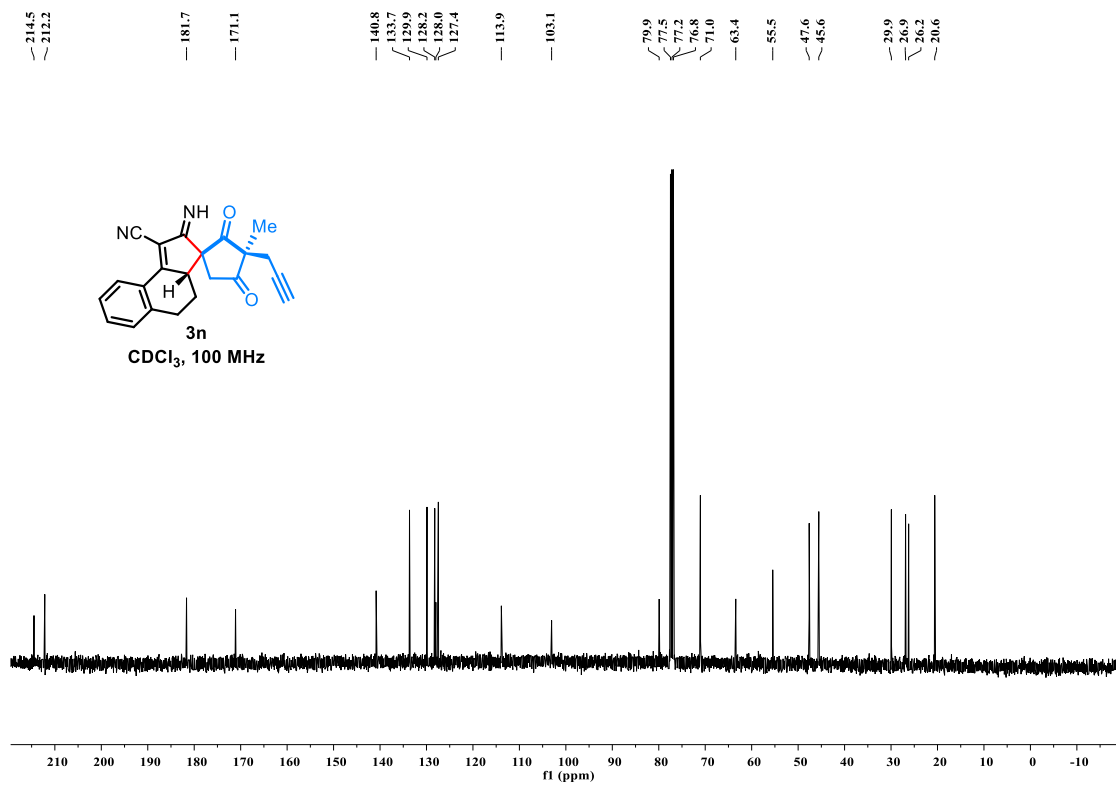

9.4570  
8.3562  
8.3301  
7.5075  
7.4870  
7.4672  
7.3978  
7.3776  
7.3571  
7.2946  
7.2783  
7.2600  
7.2607  
5.9068  
5.8862  
5.8637  
5.8424  
5.8237  
5.6035  
5.5816  
5.5598  
5.5388  
5.5323  
5.5171  
5.1787  
5.1558  
5.1456  
5.1366  
5.1033  
5.0894  
5.0836  
5.0647  
5.0579  
3.6240  
3.6163  
3.5980  
3.5809  
3.0911  
3.0699  
3.0609  
3.0225  
3.0153  
2.8171  
2.7685  
2.6959  
2.6796  
2.6611  
2.6386  
2.6165  
2.5994  
2.5814  
2.4959  
2.4668  
2.4580  
2.4470  
2.4367  
2.4281  
2.3991  
2.0221  
2.0128  
2.0026  
1.9913  
1.9815  
1.9722  
1.7418  
1.7156  
1.7037  
1.6859  
1.6575  
1.6300

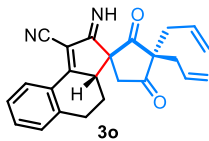

CDCl<sub>3</sub>, 400 MHz

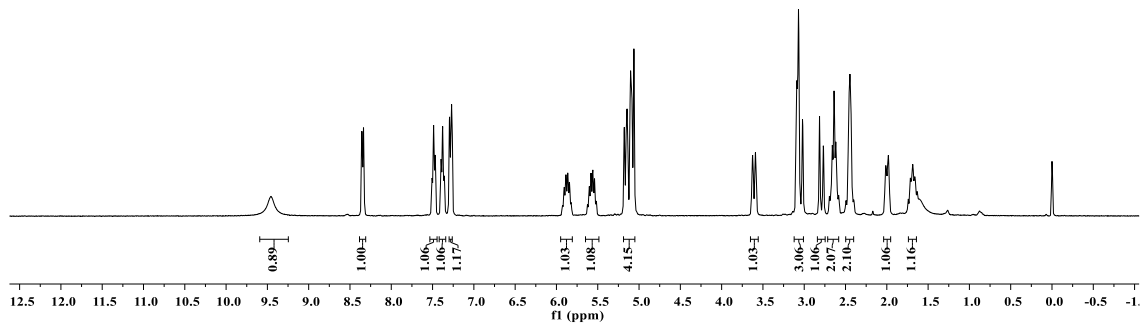

214.4  
212.8  
181.5  
170.6  
140.6  
135.6  
134.2  
131.7  
129.9  
128.2  
128.0  
127.5  
126.5  
119.7  
113.9  
77.5  
77.2  
76.8  
63.0  
60.6  
48.6  
45.1  
38.9  
38.5  
29.9  
26.7

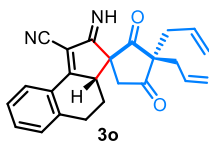

CDCl<sub>3</sub>, 100 MHz

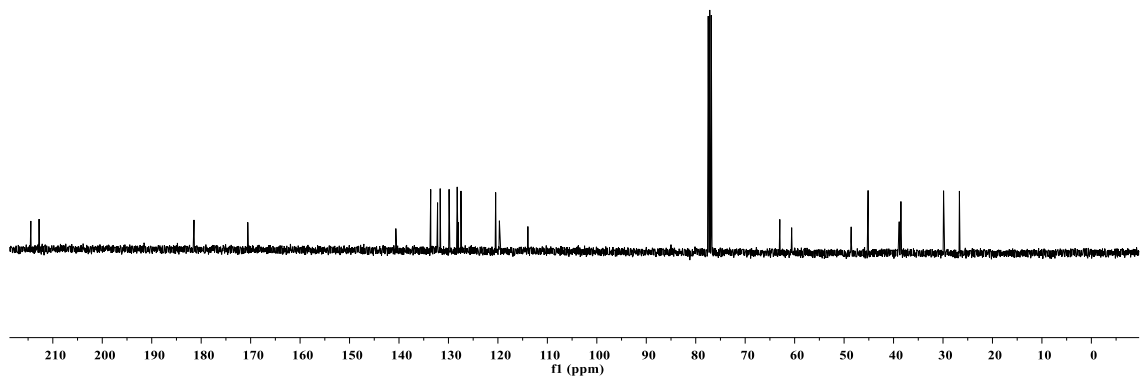

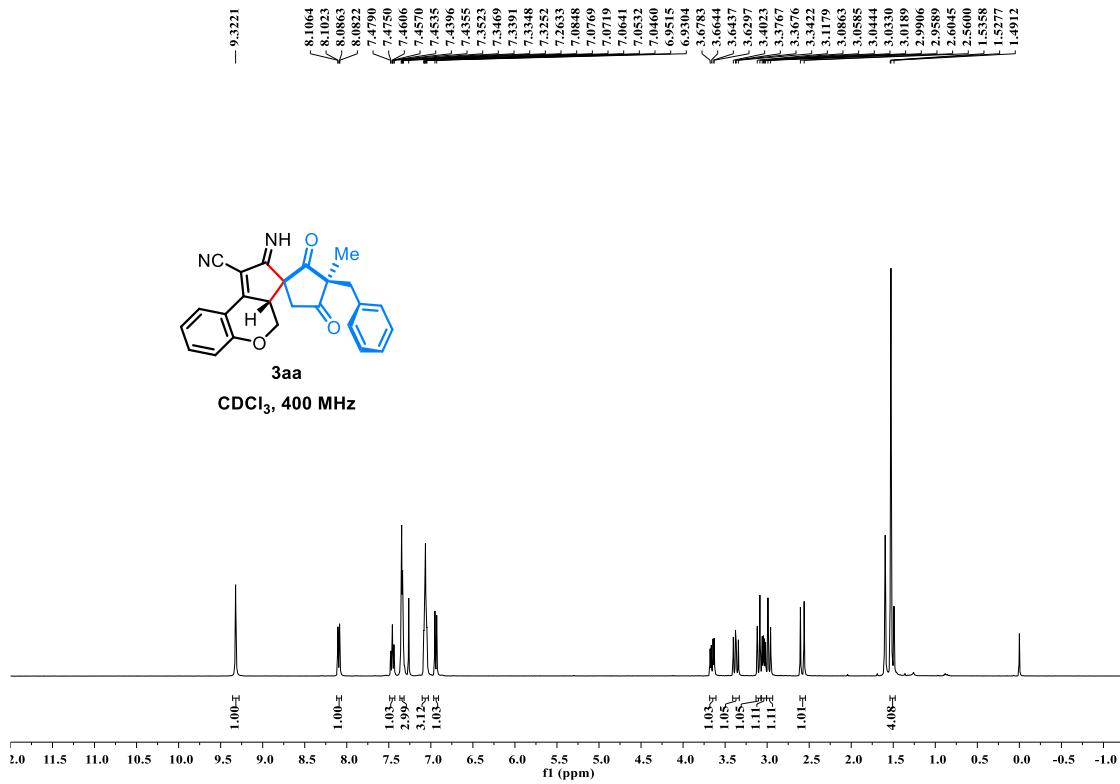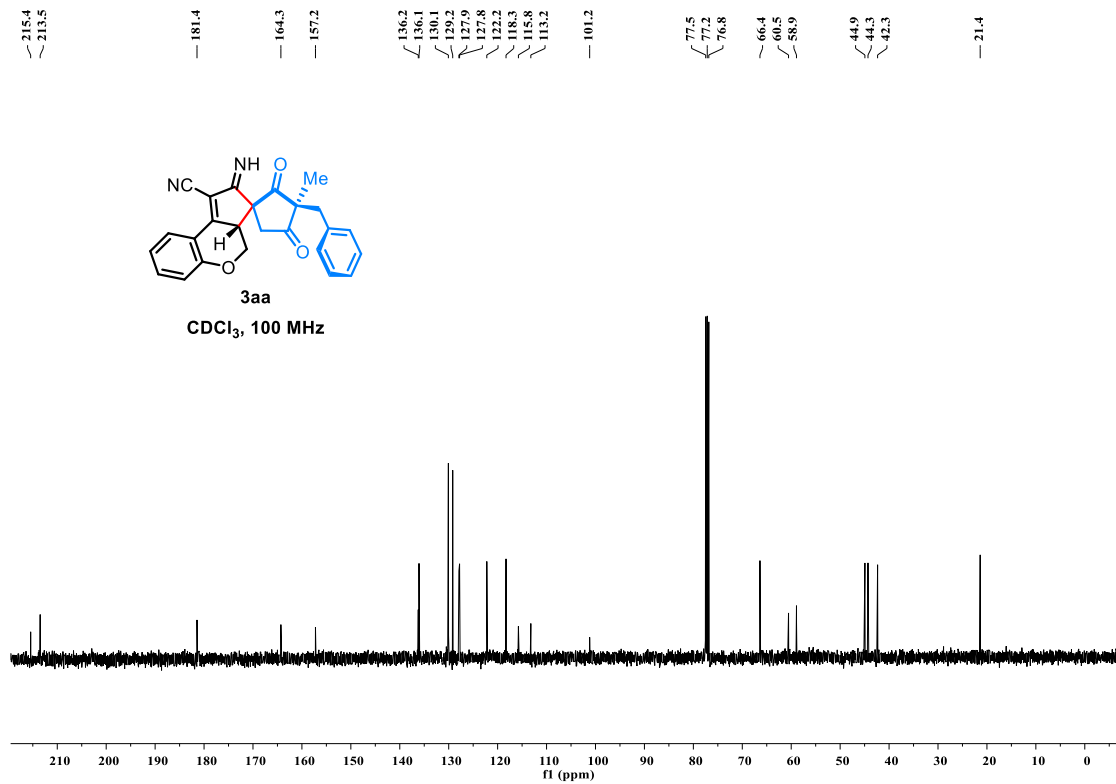

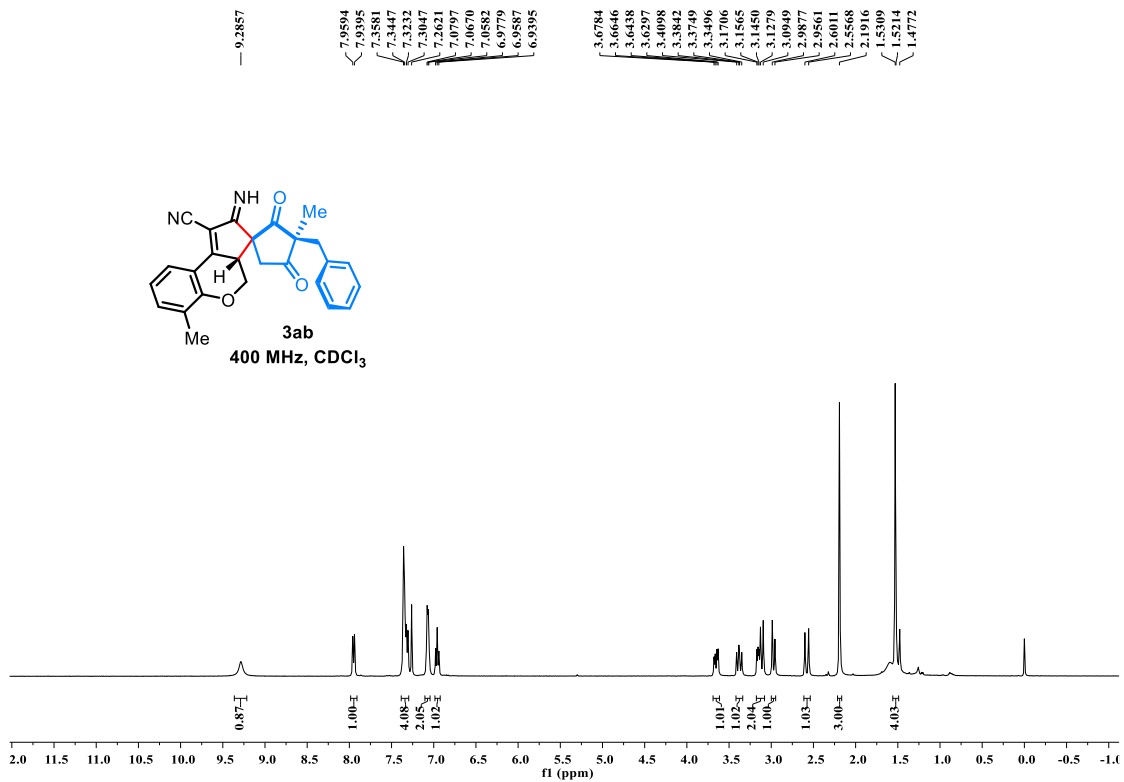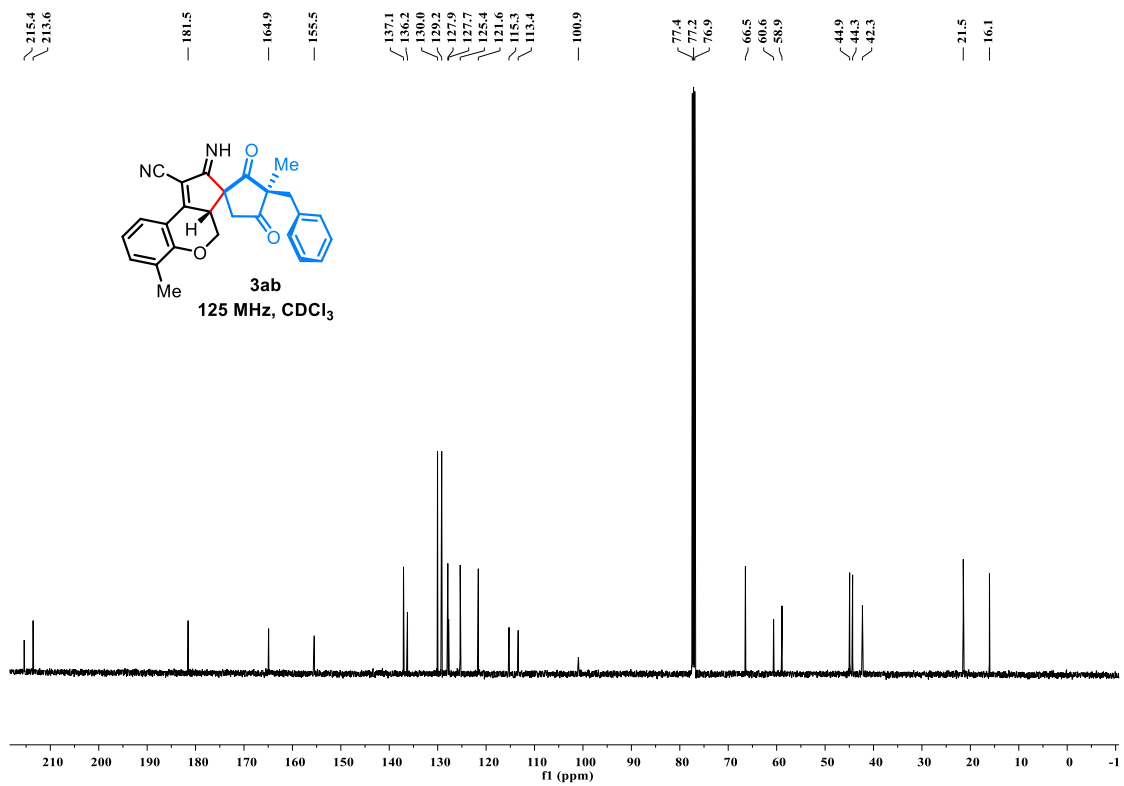

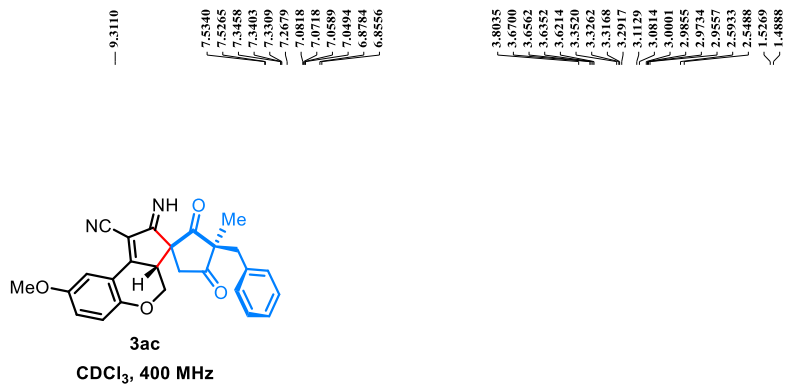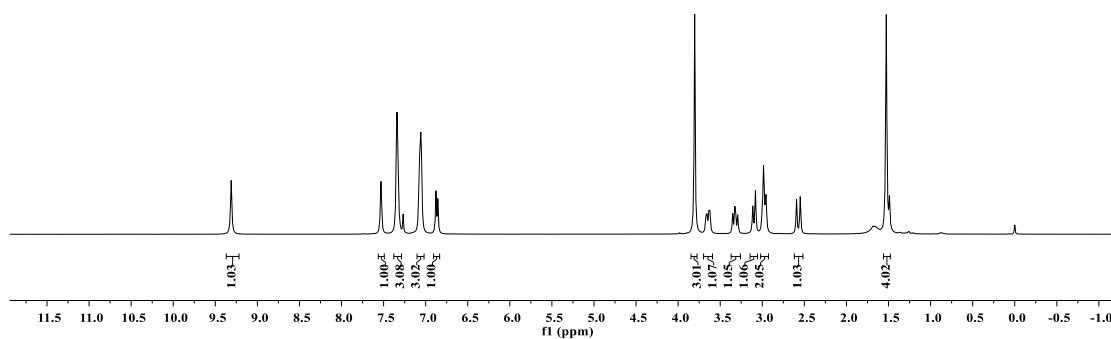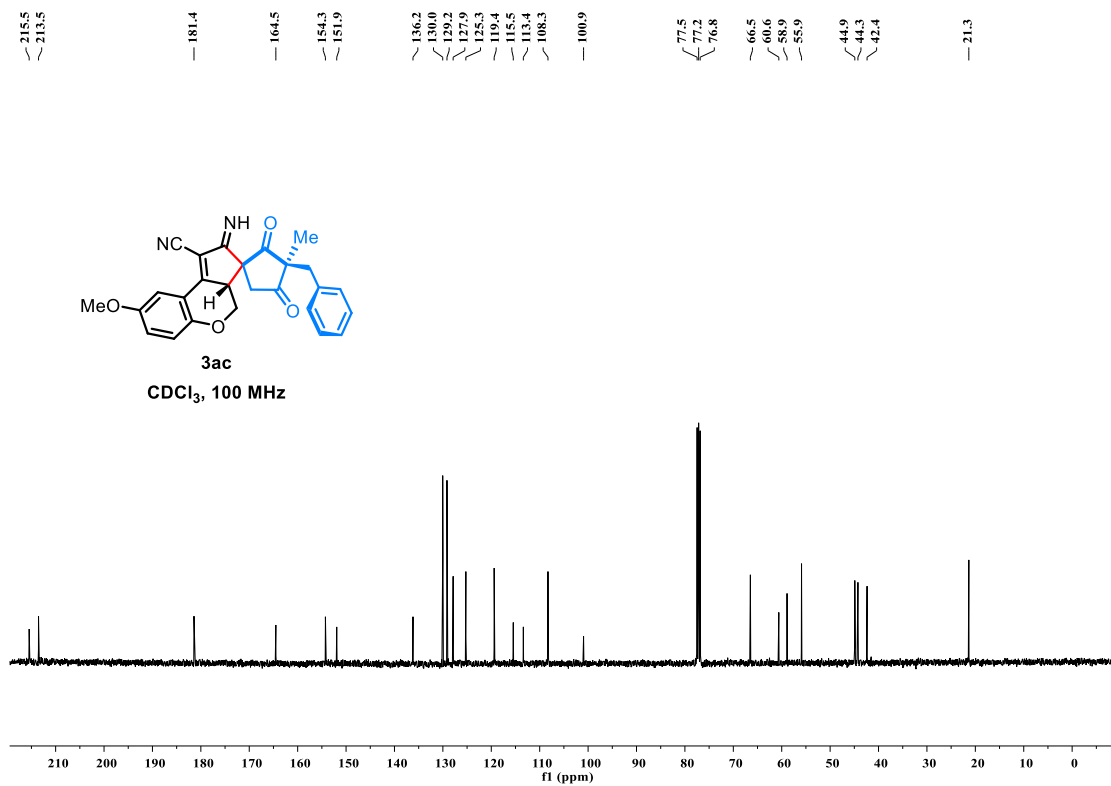

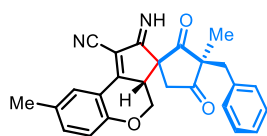

**3ad**  
CDCl<sub>3</sub>, 400 MHz

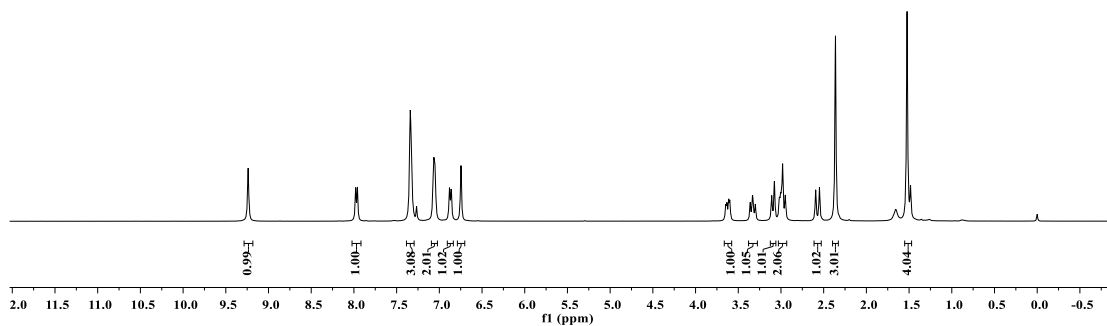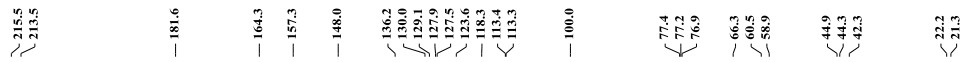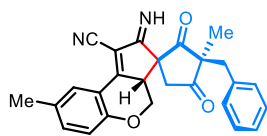

**3ad**  
CDCl<sub>3</sub>, 125 MHz

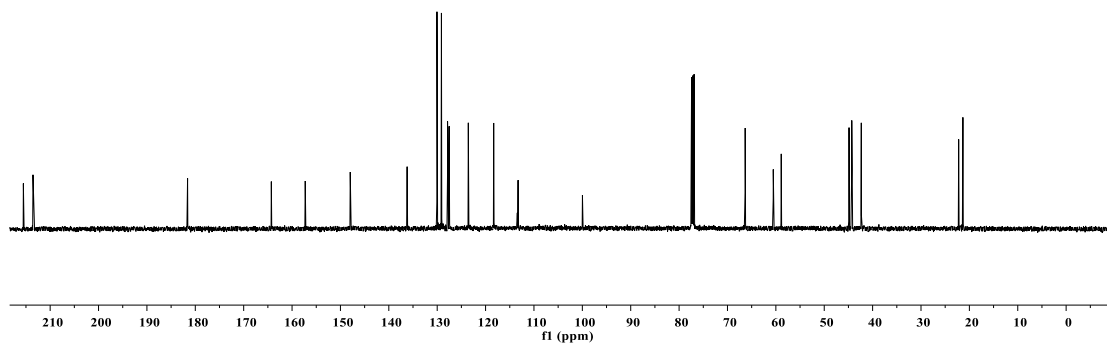

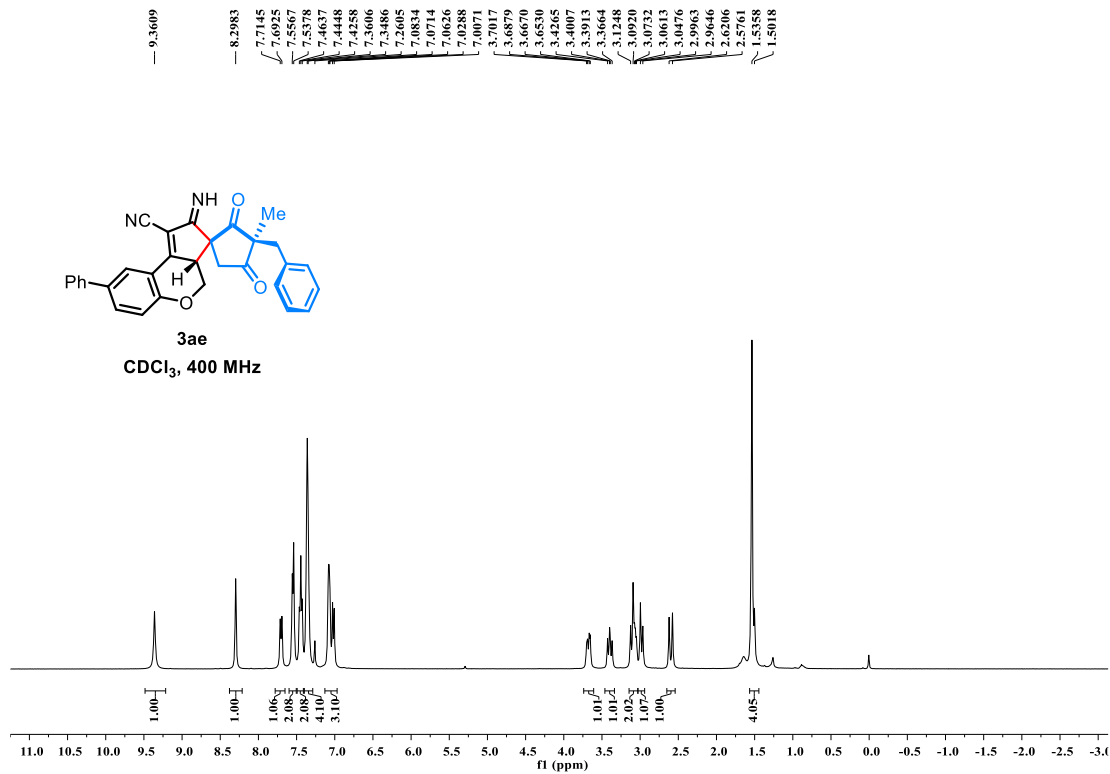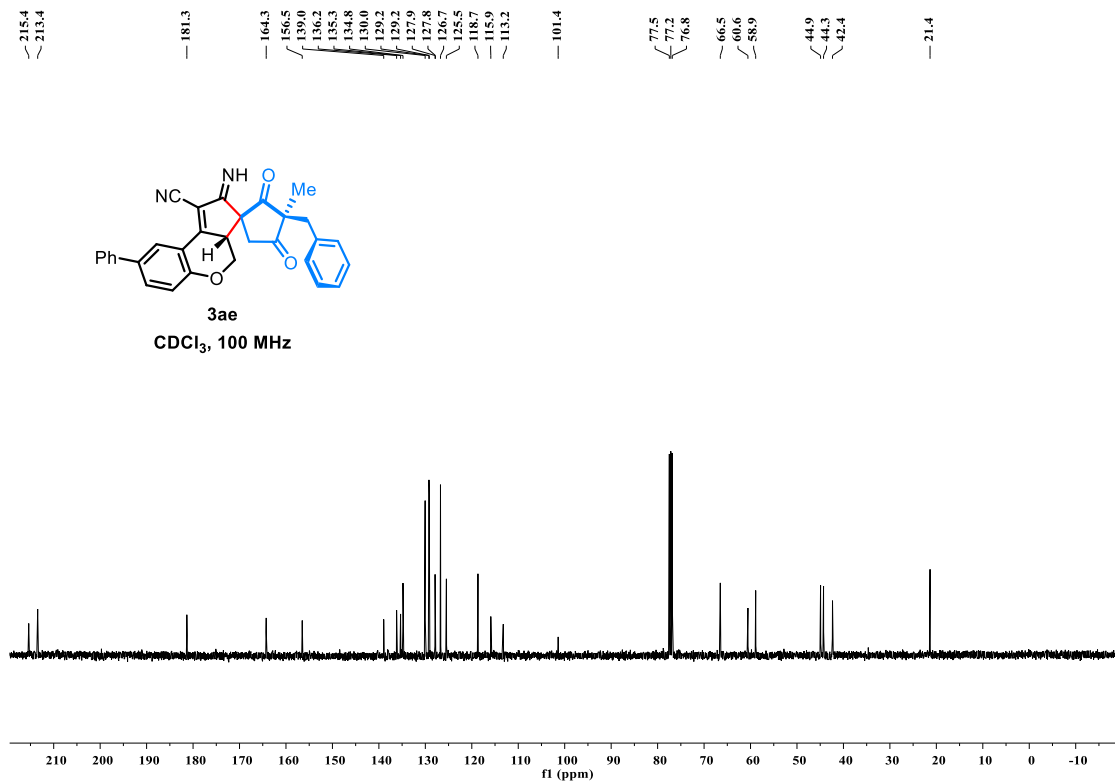

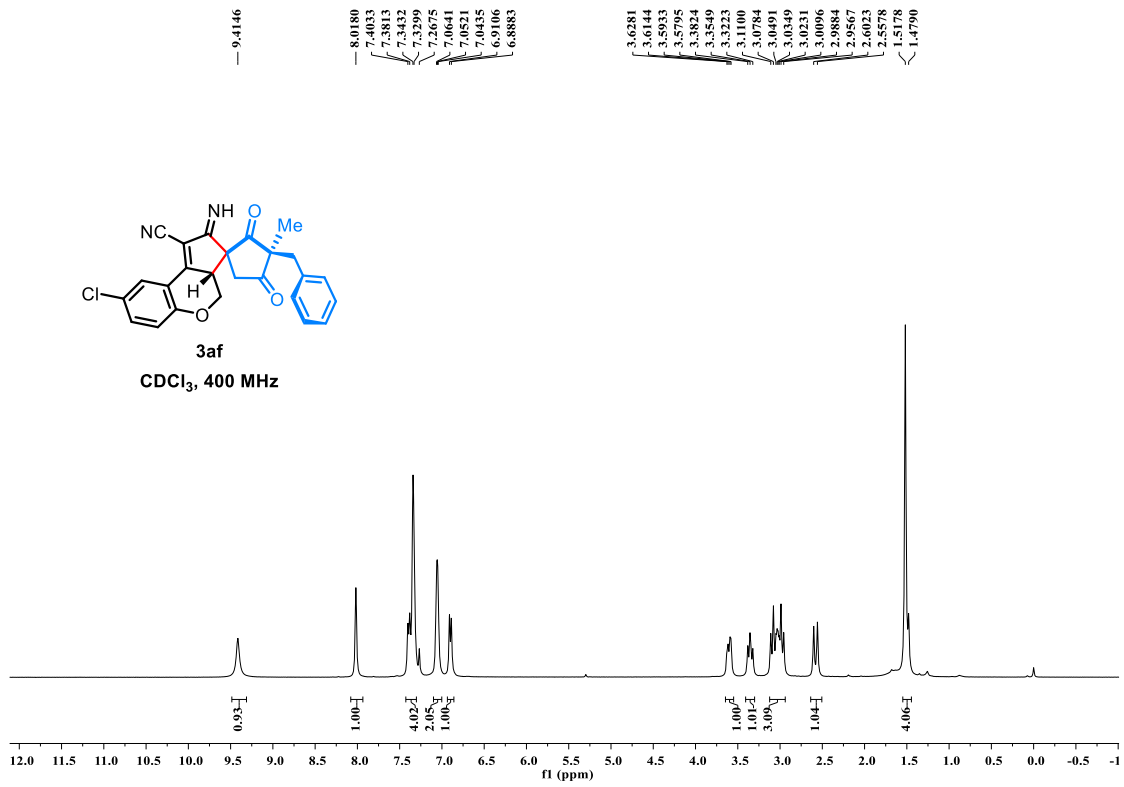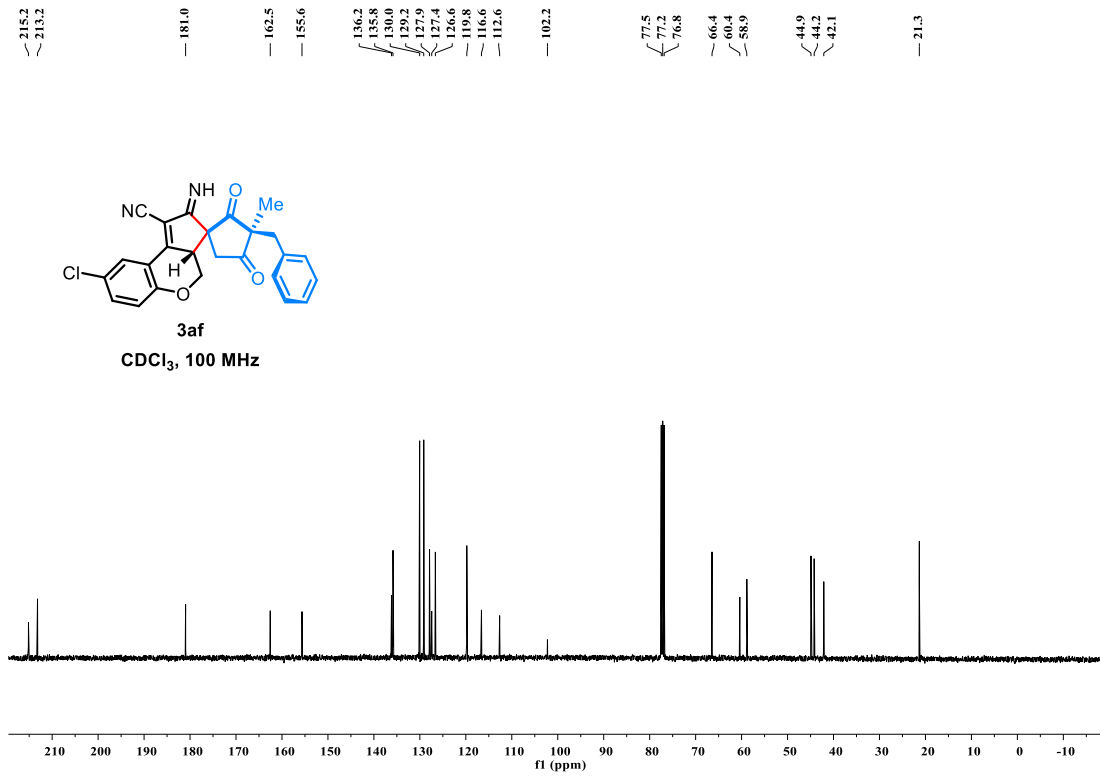



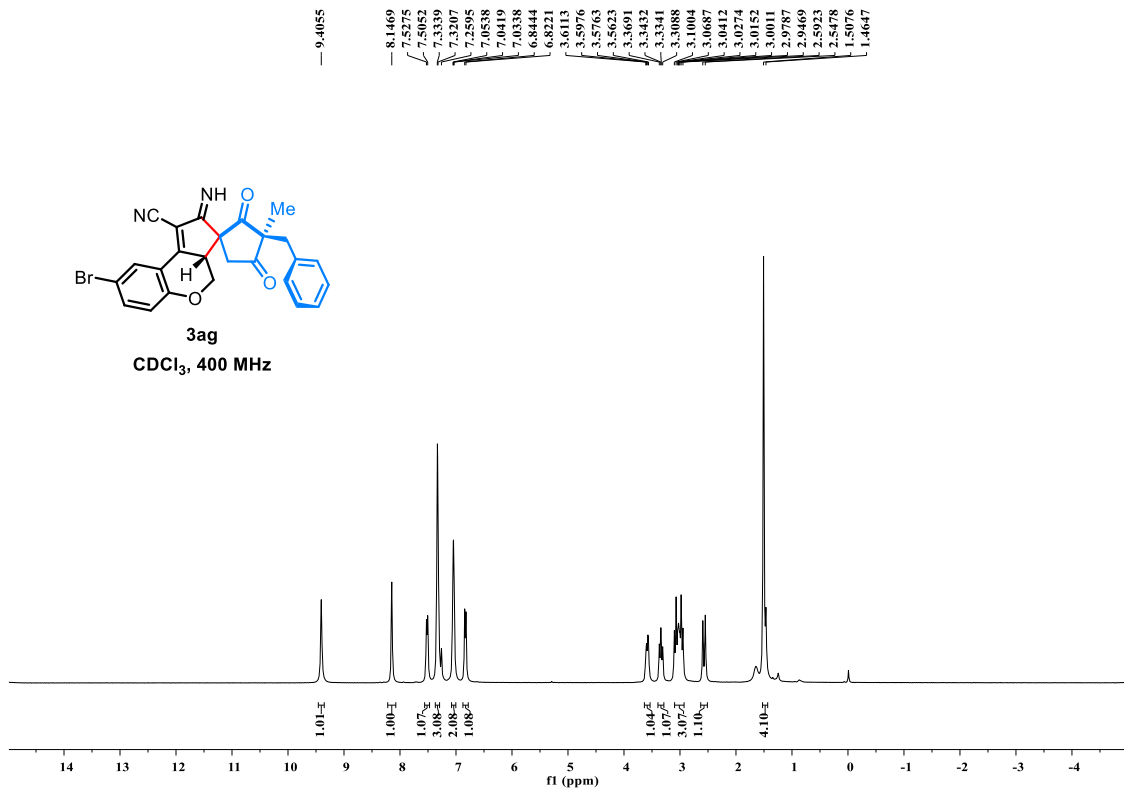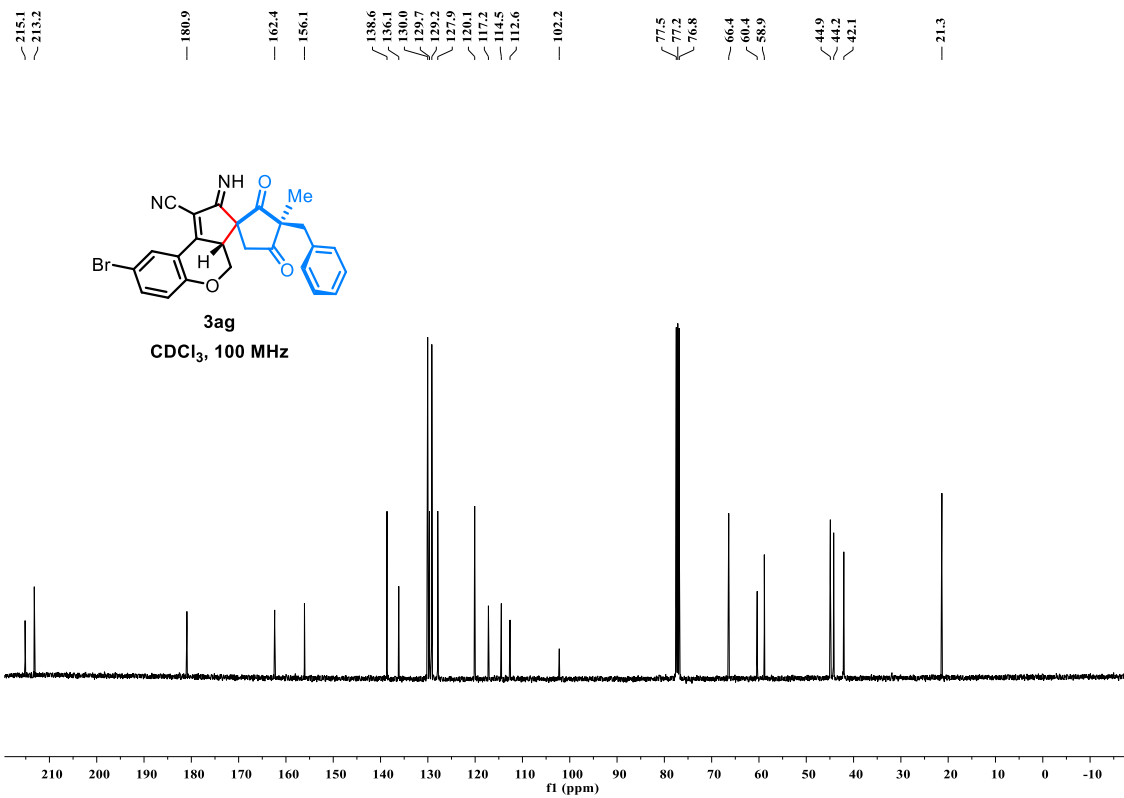

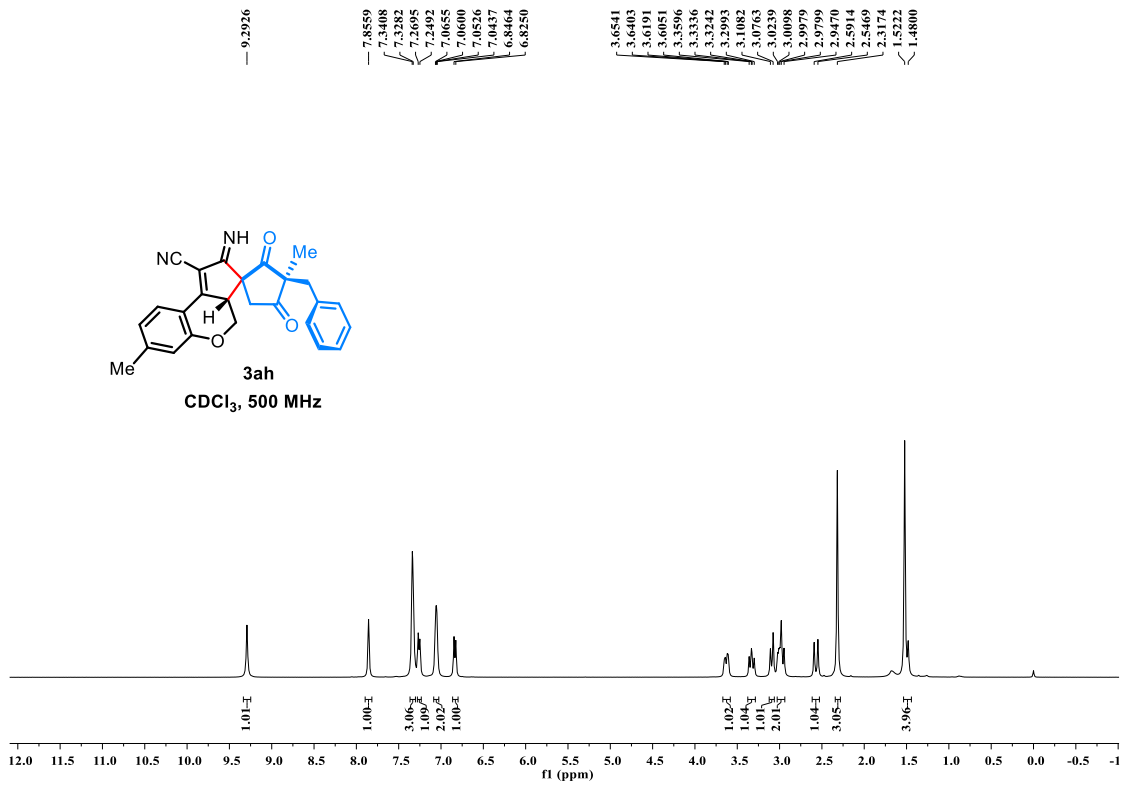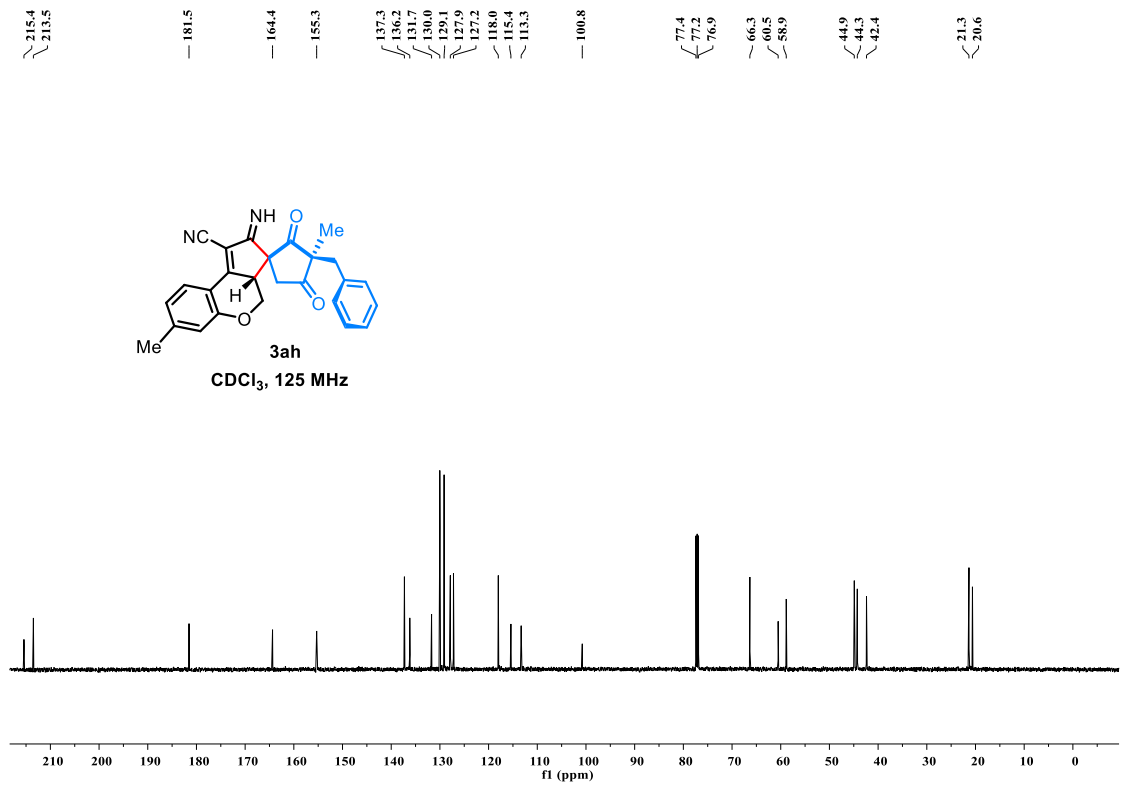

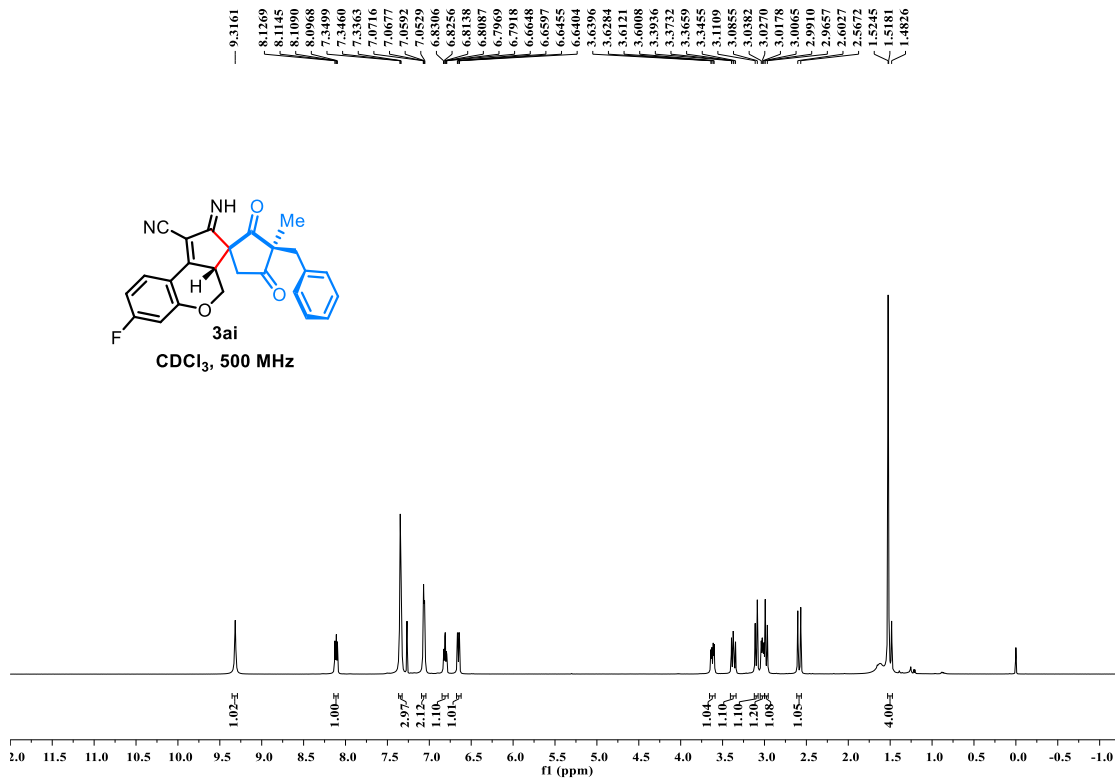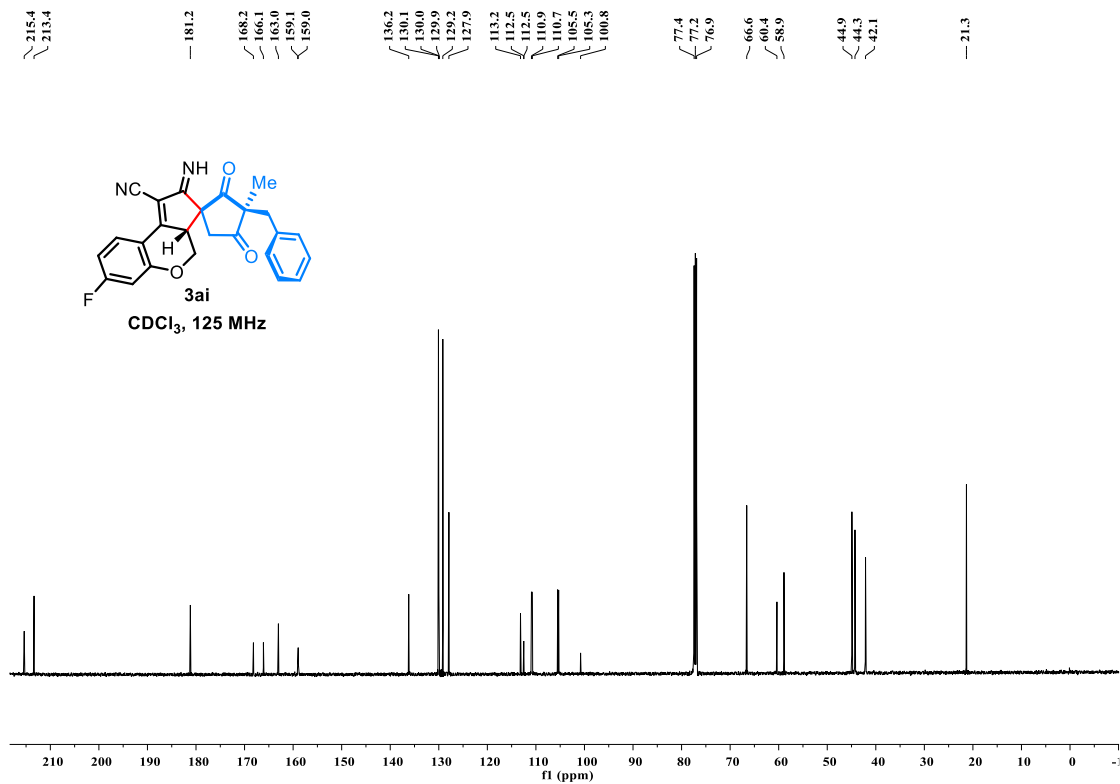

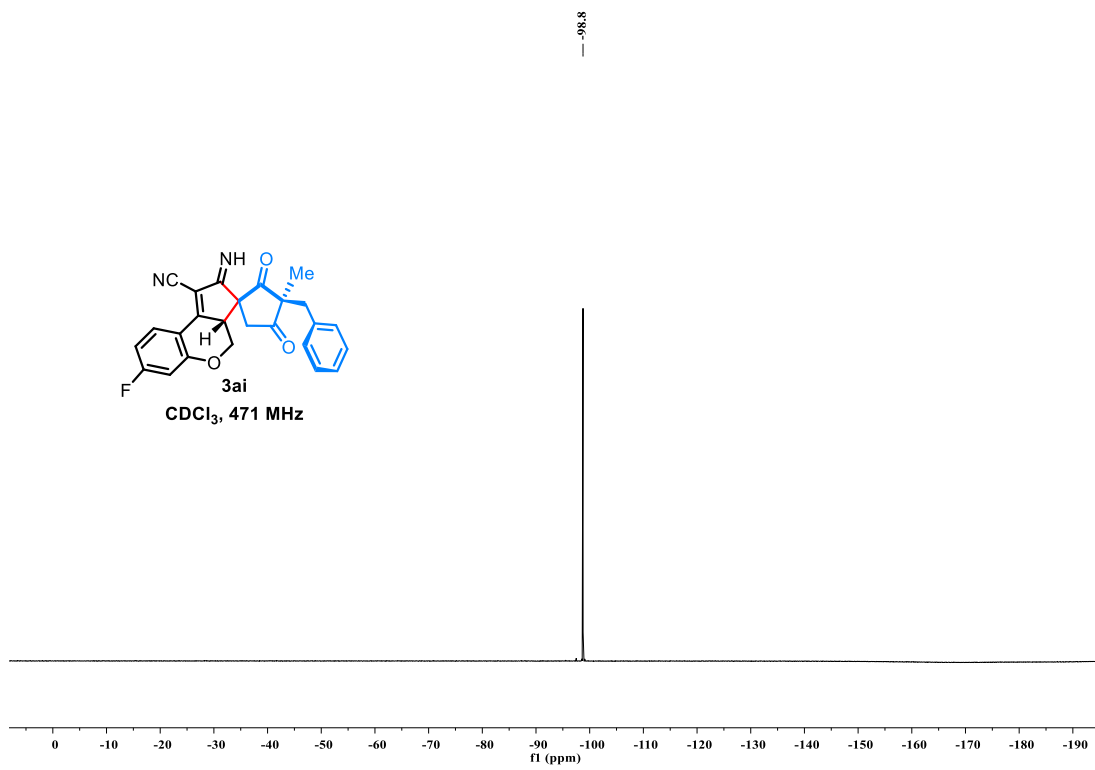

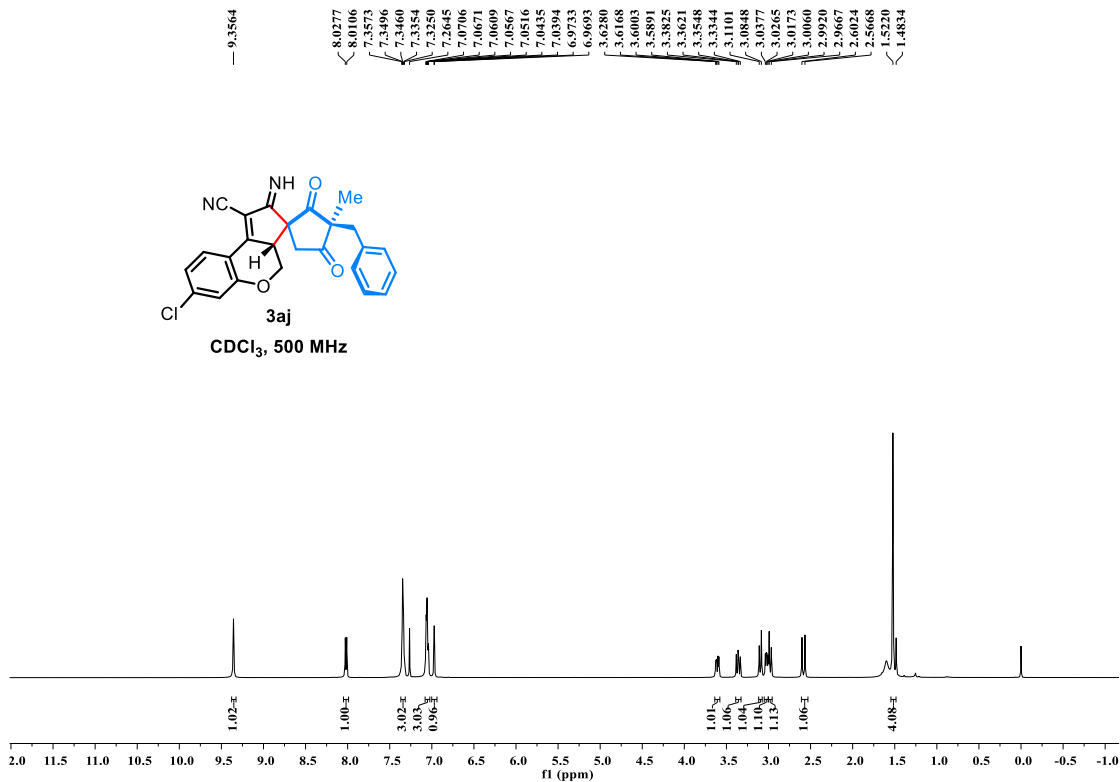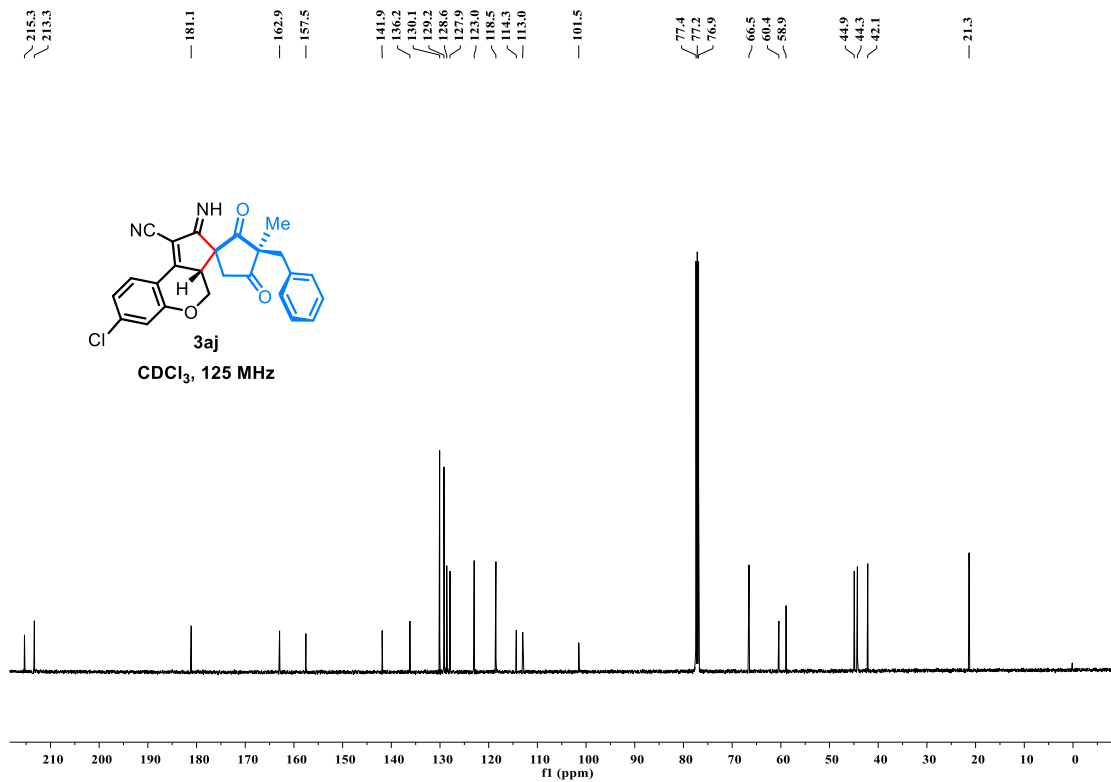

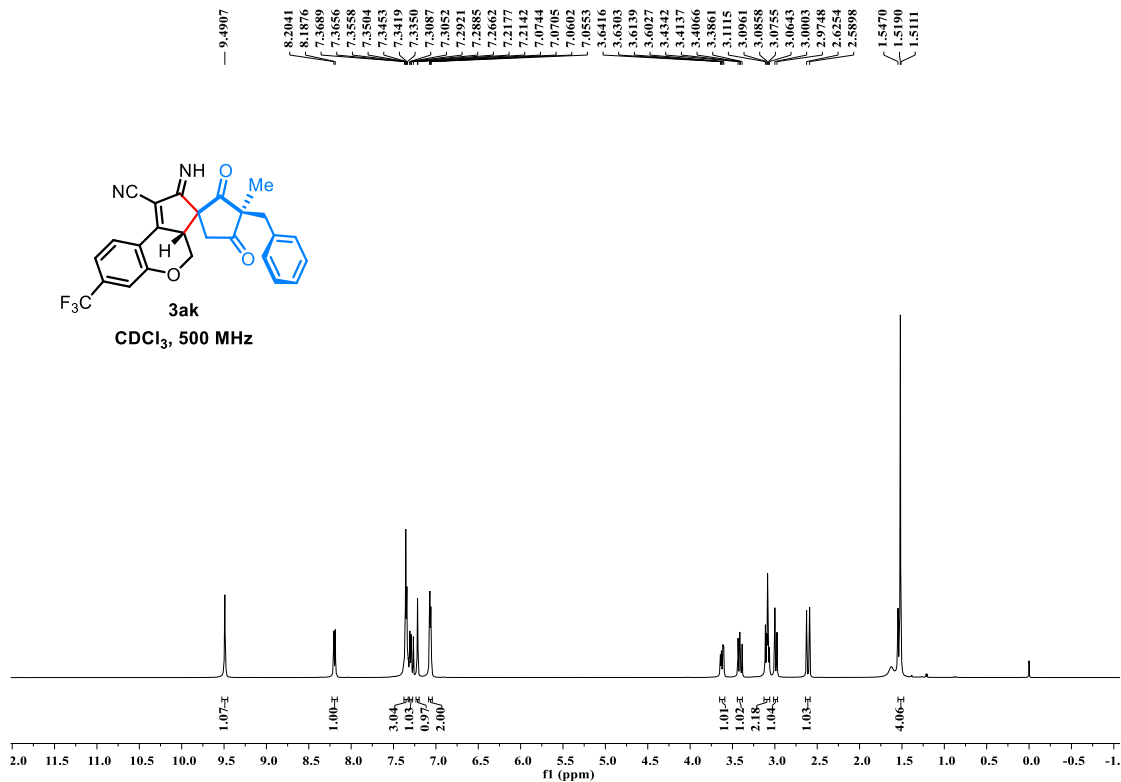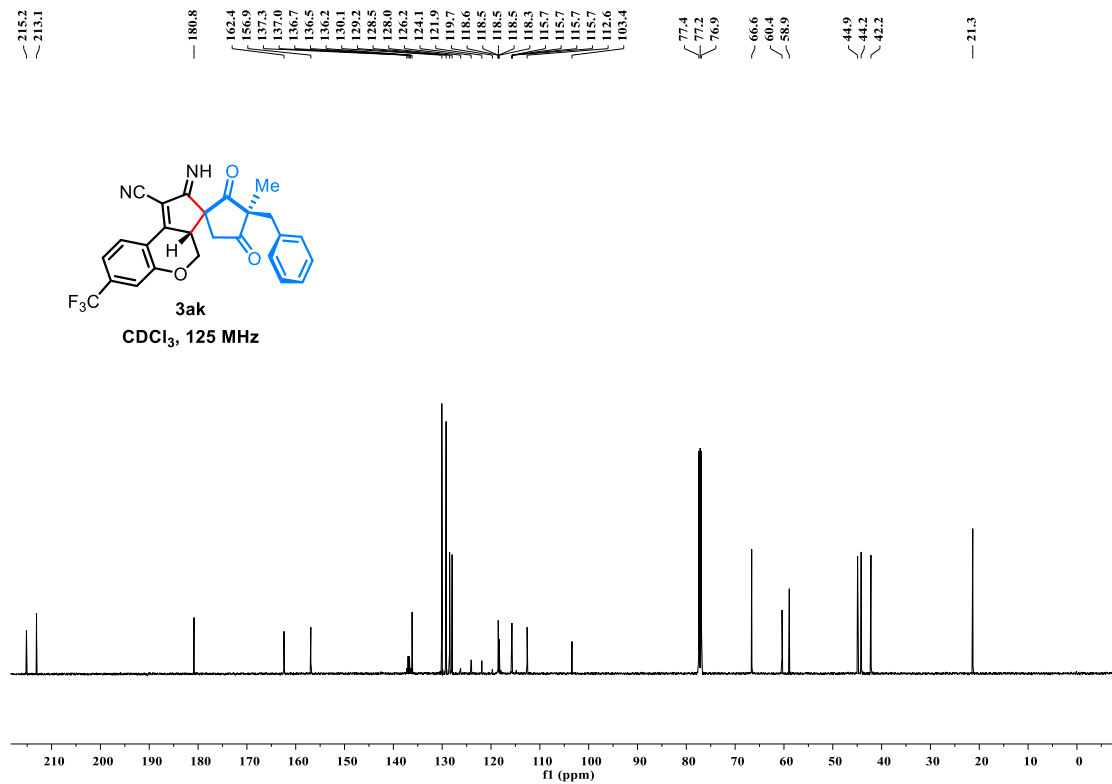

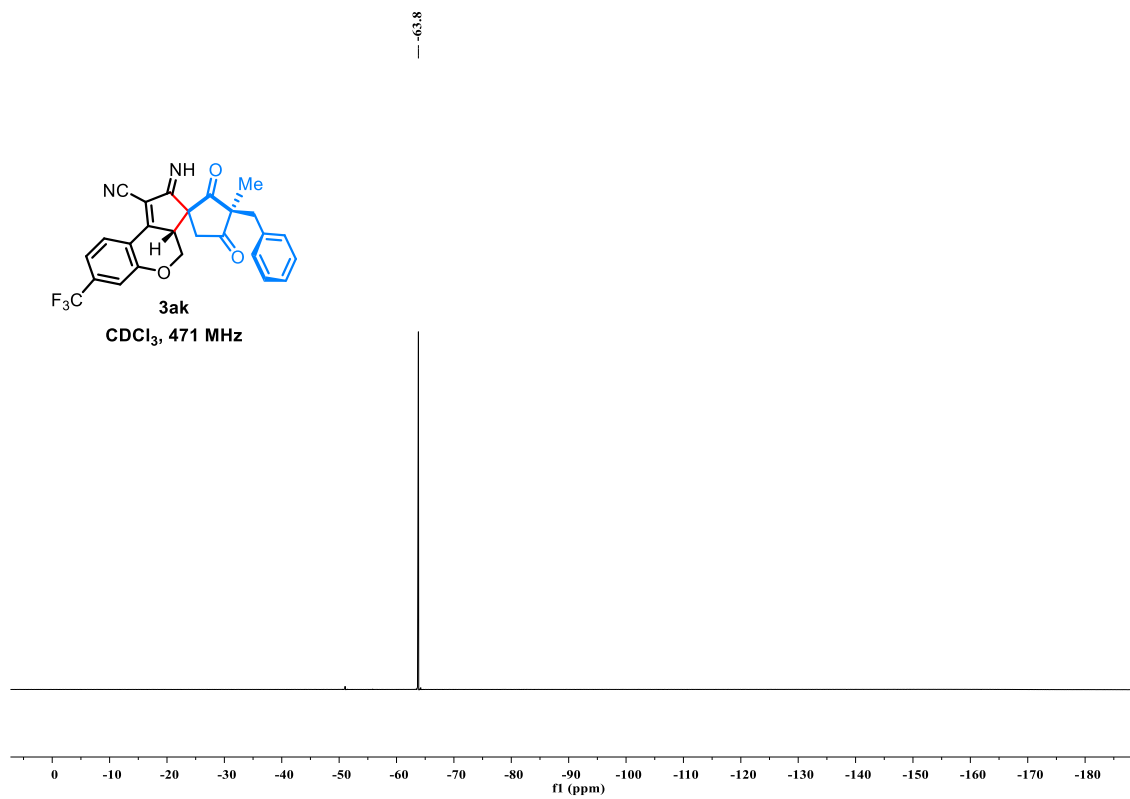

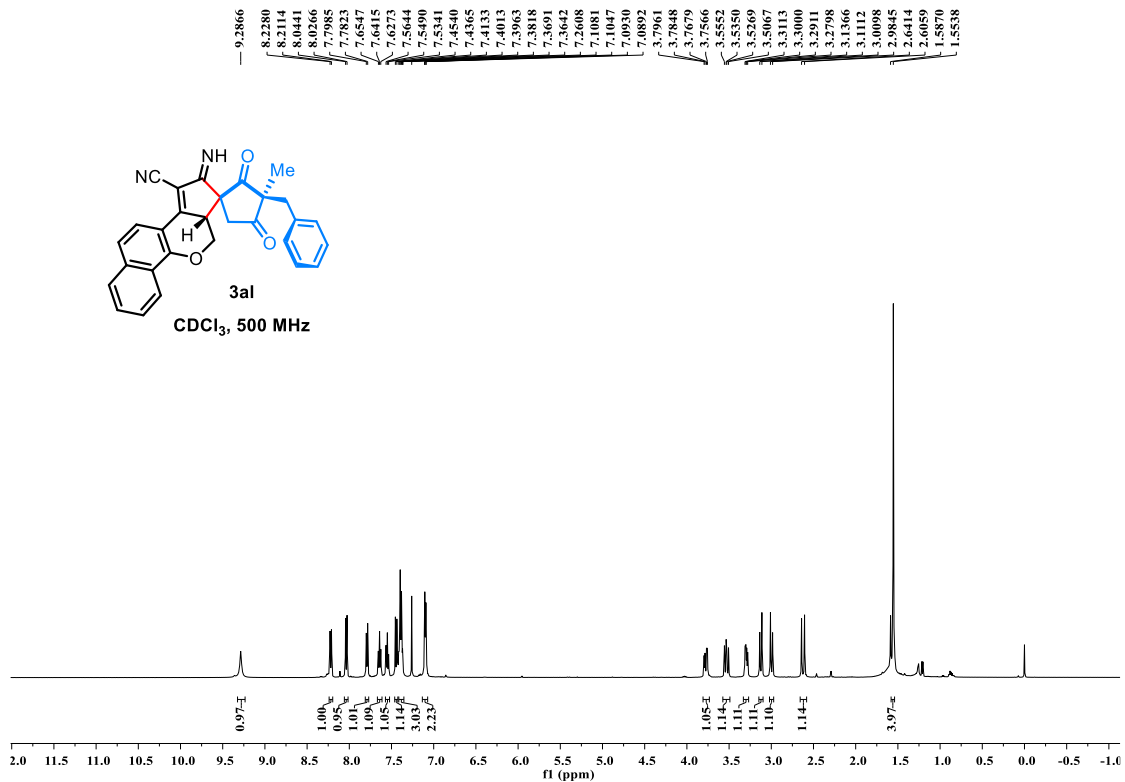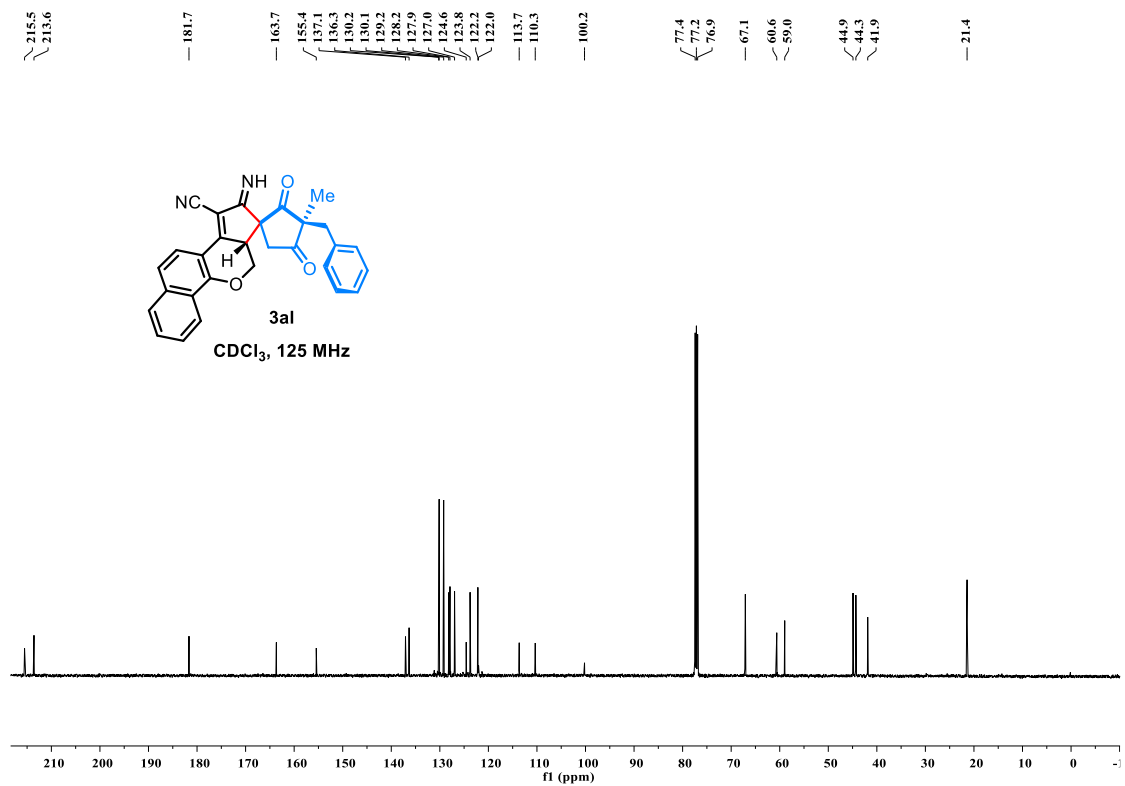



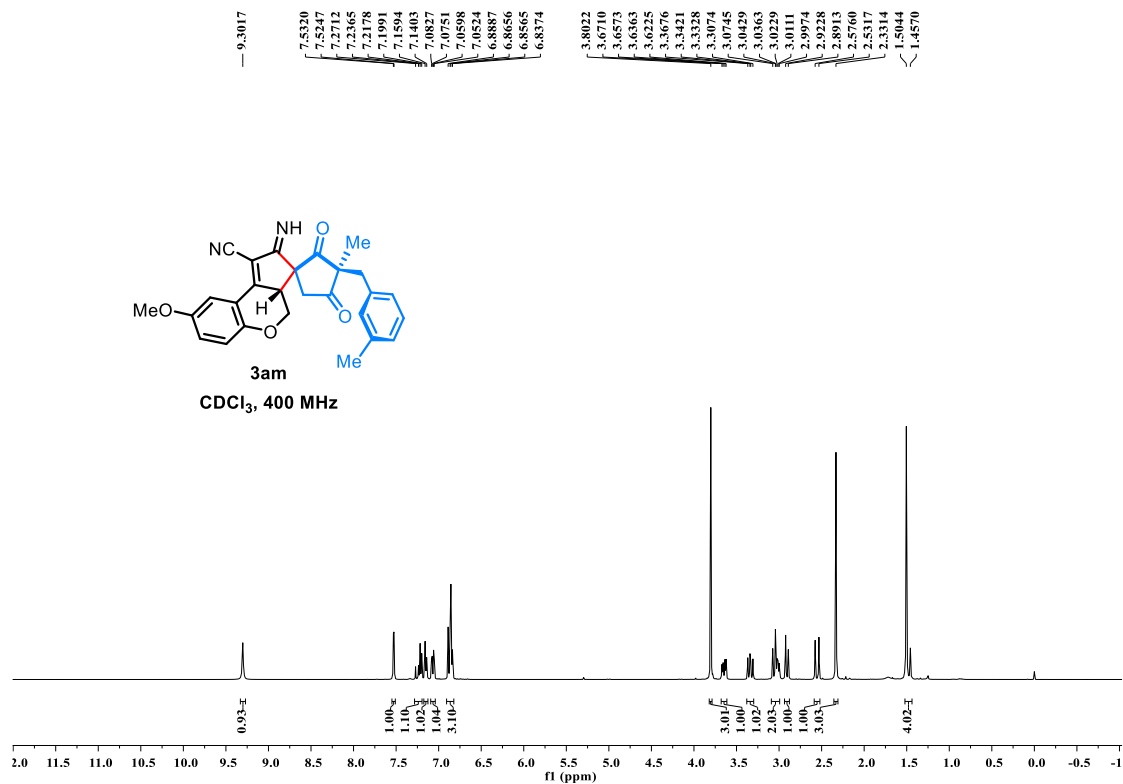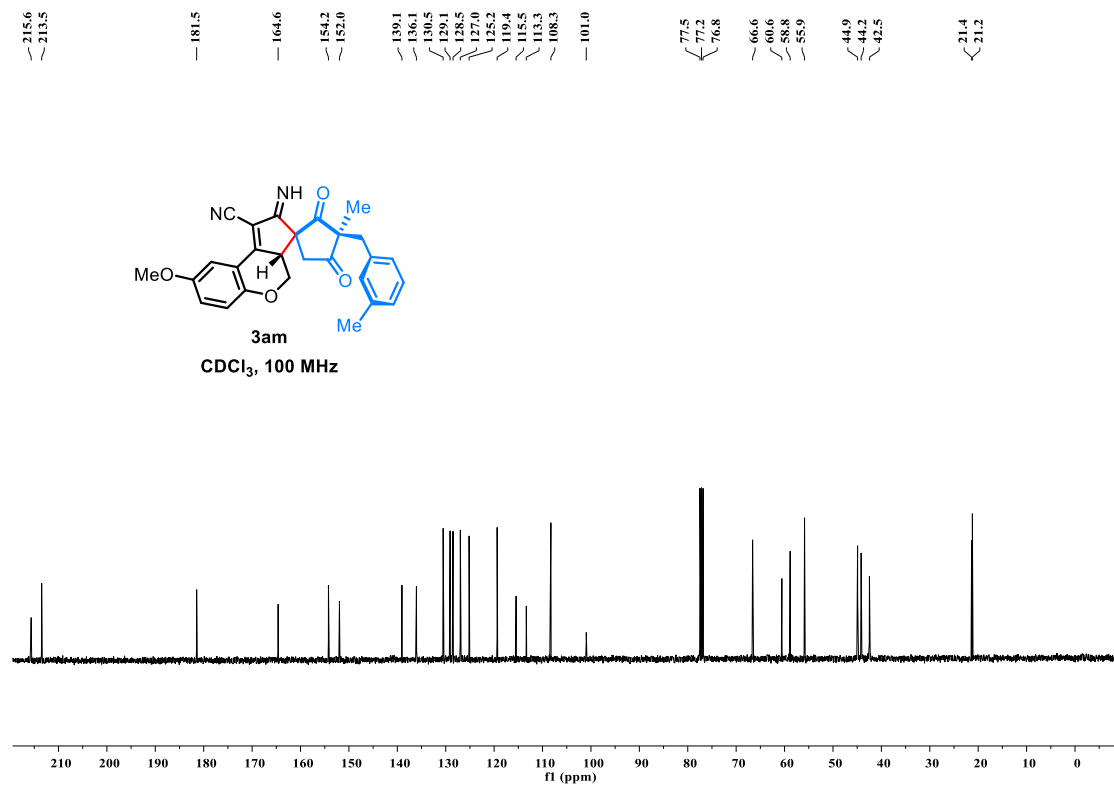

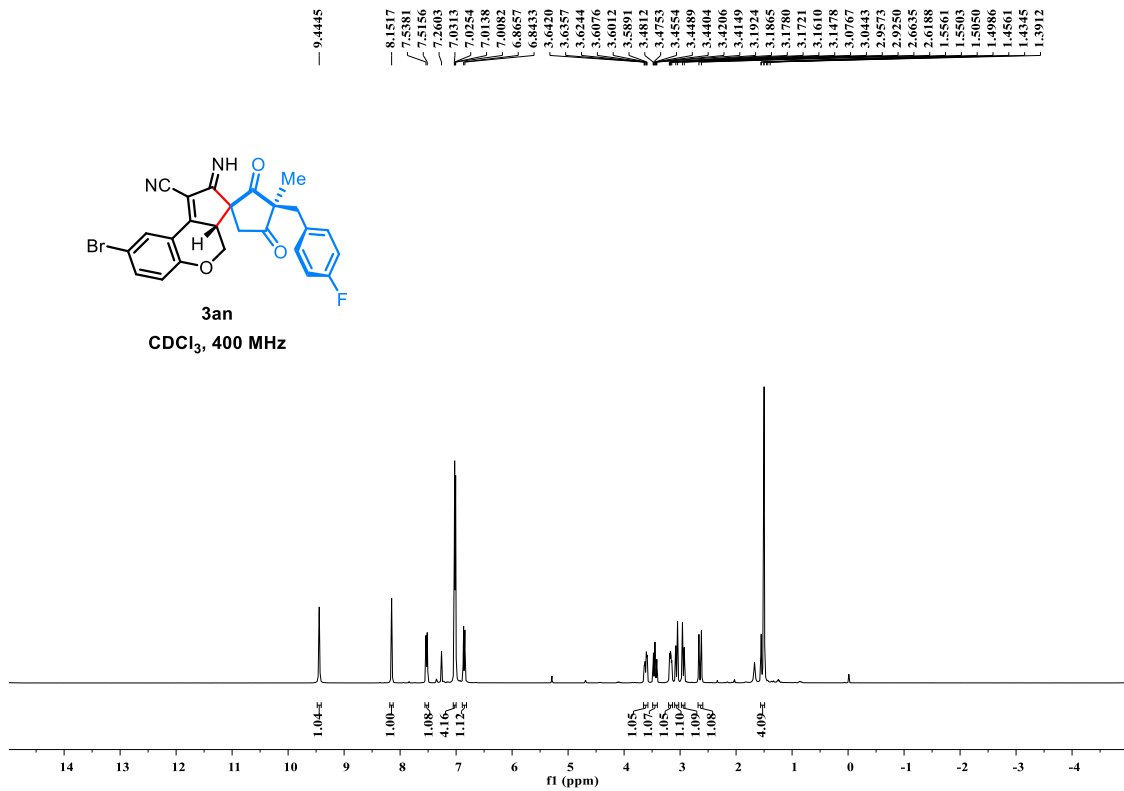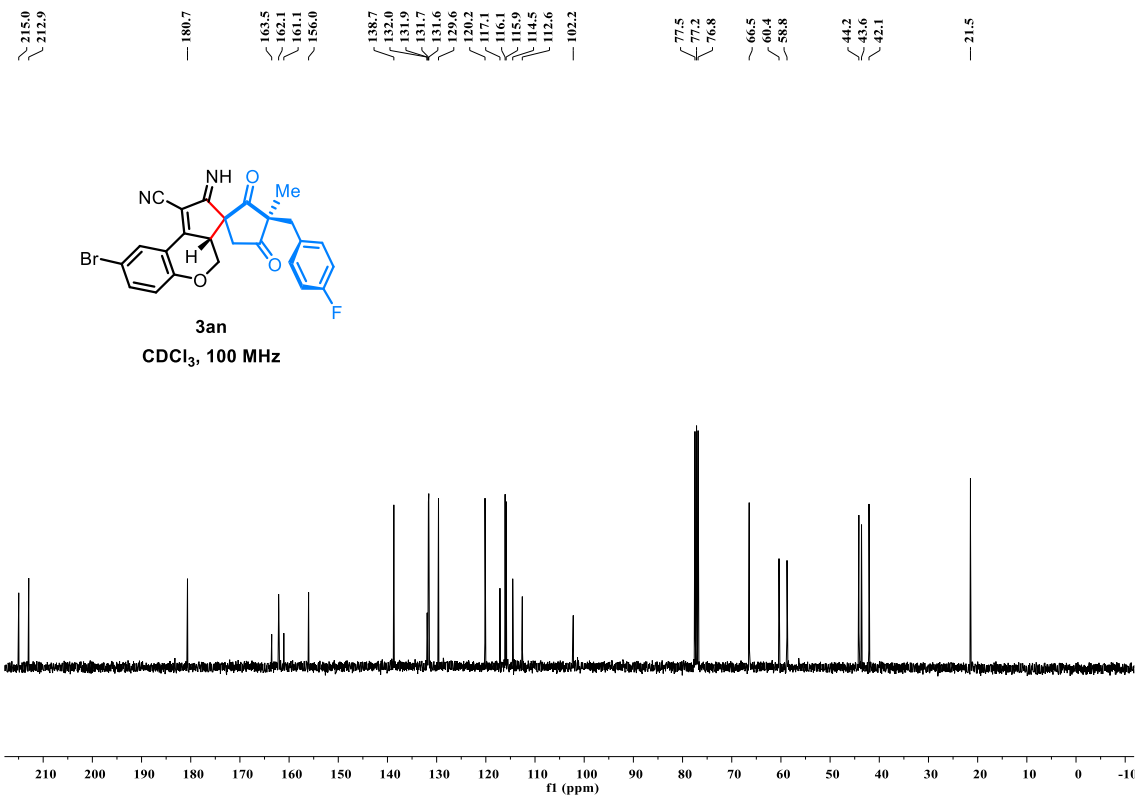

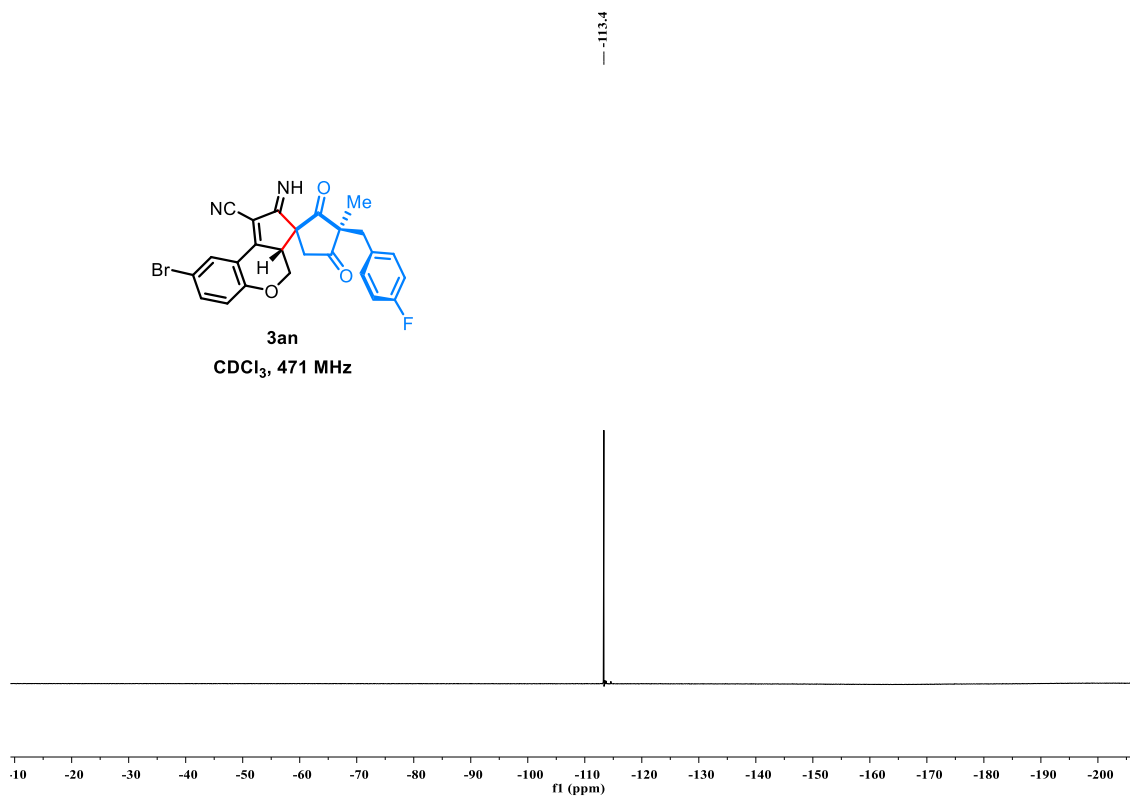

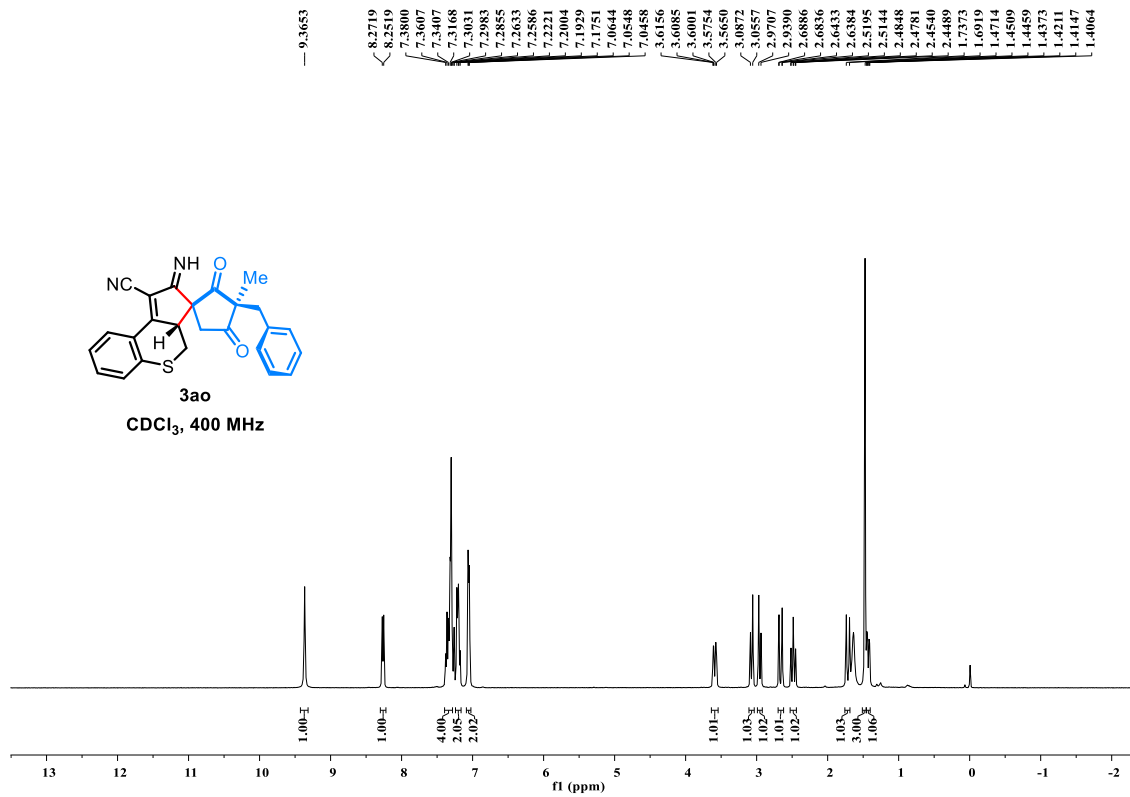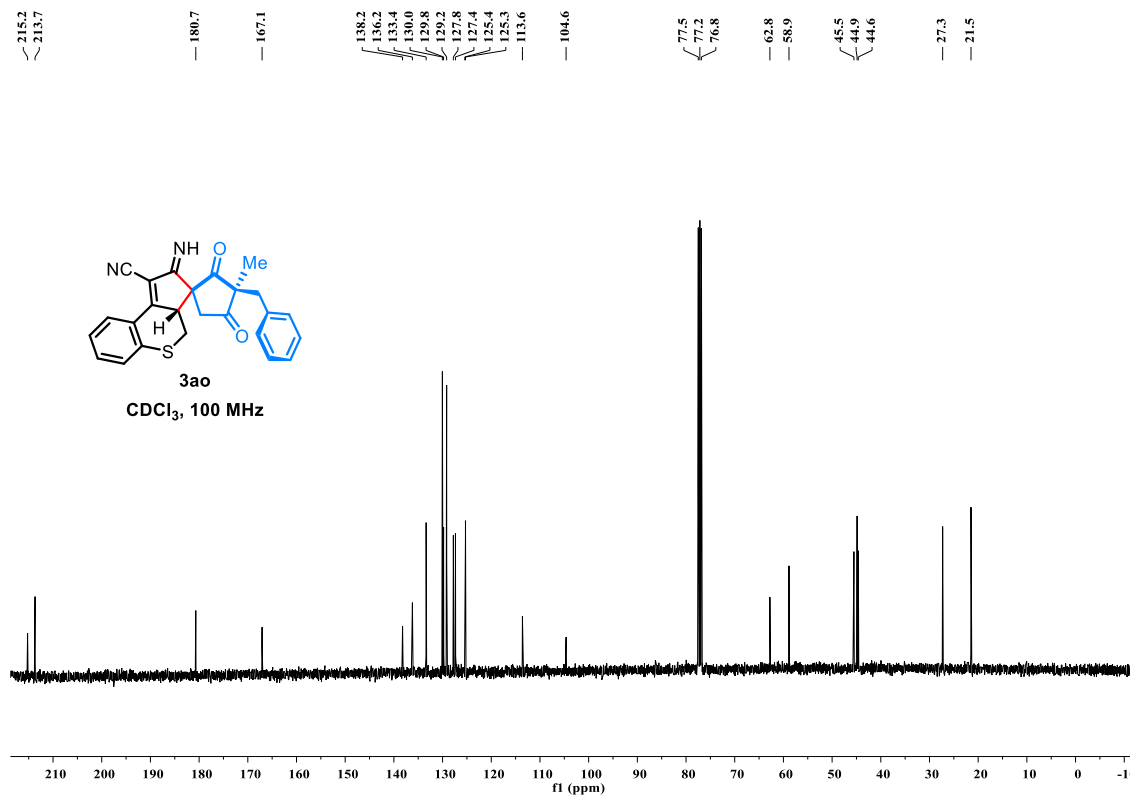

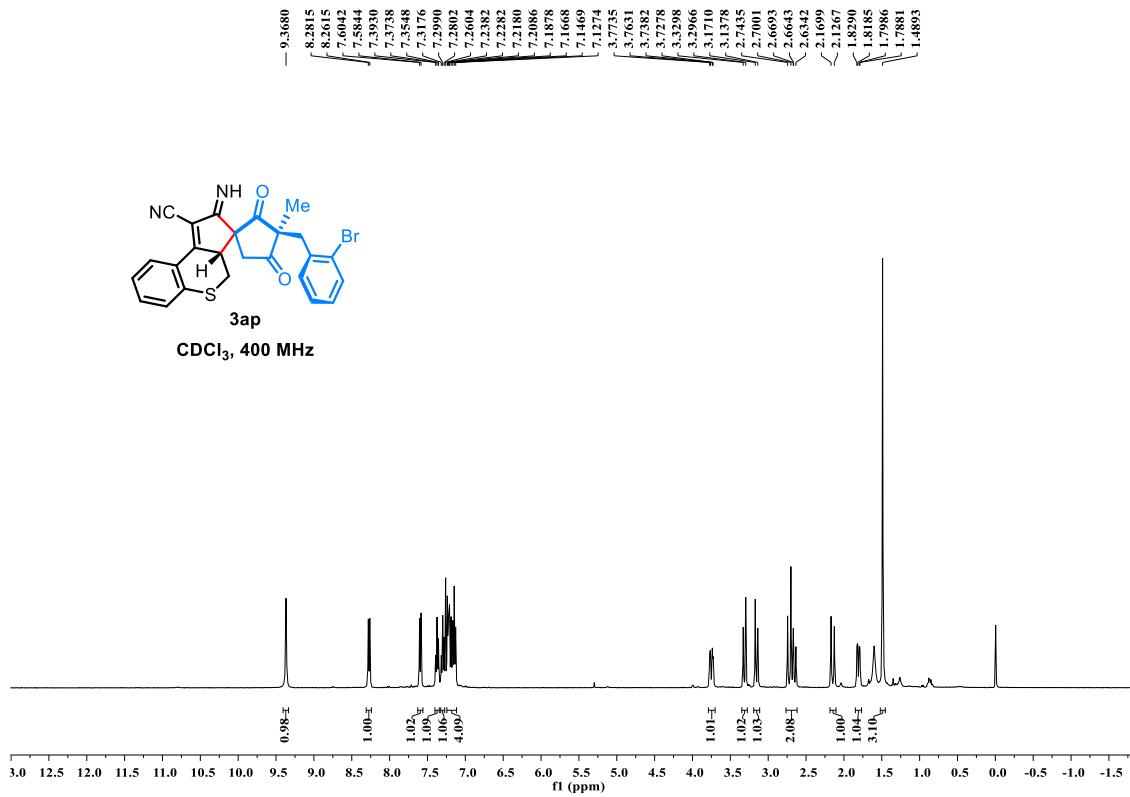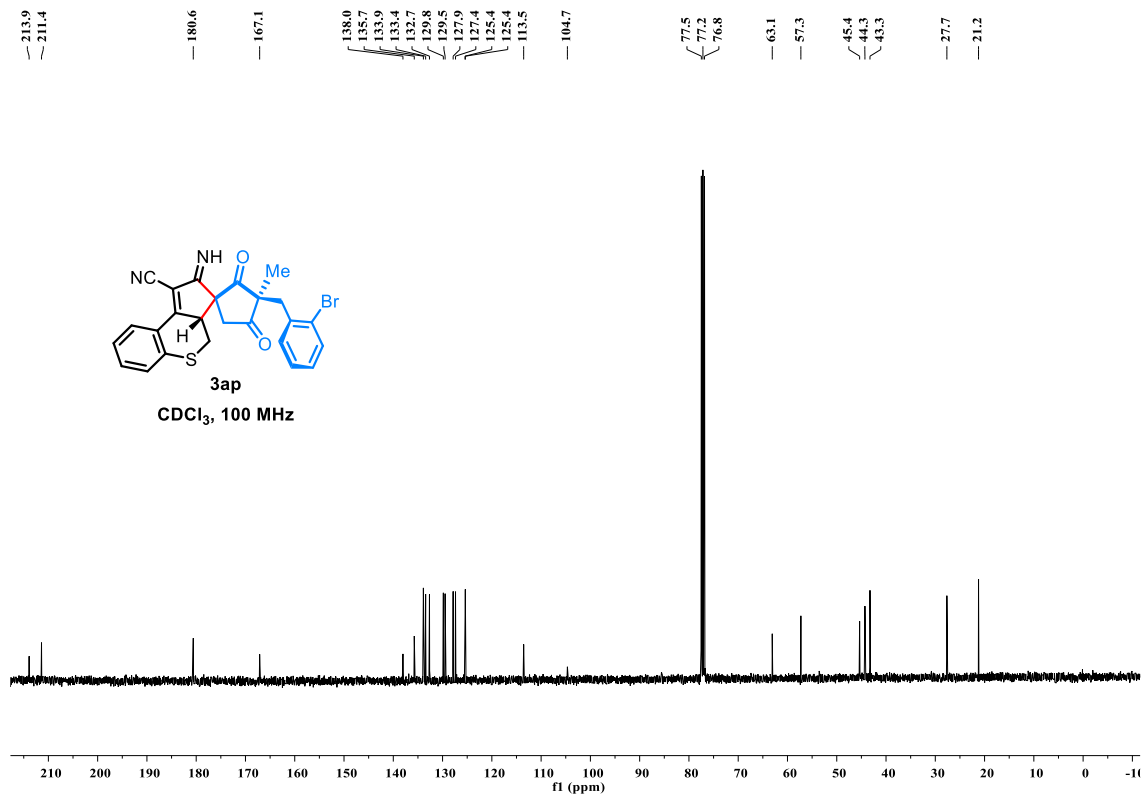

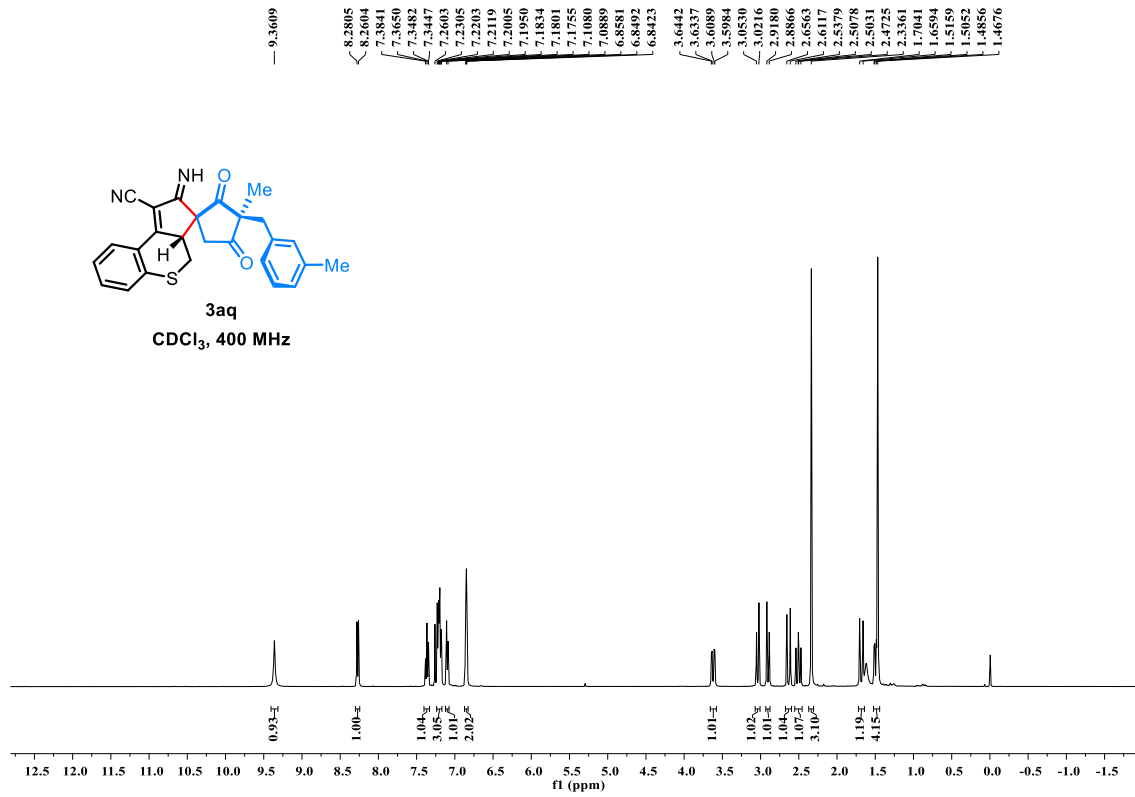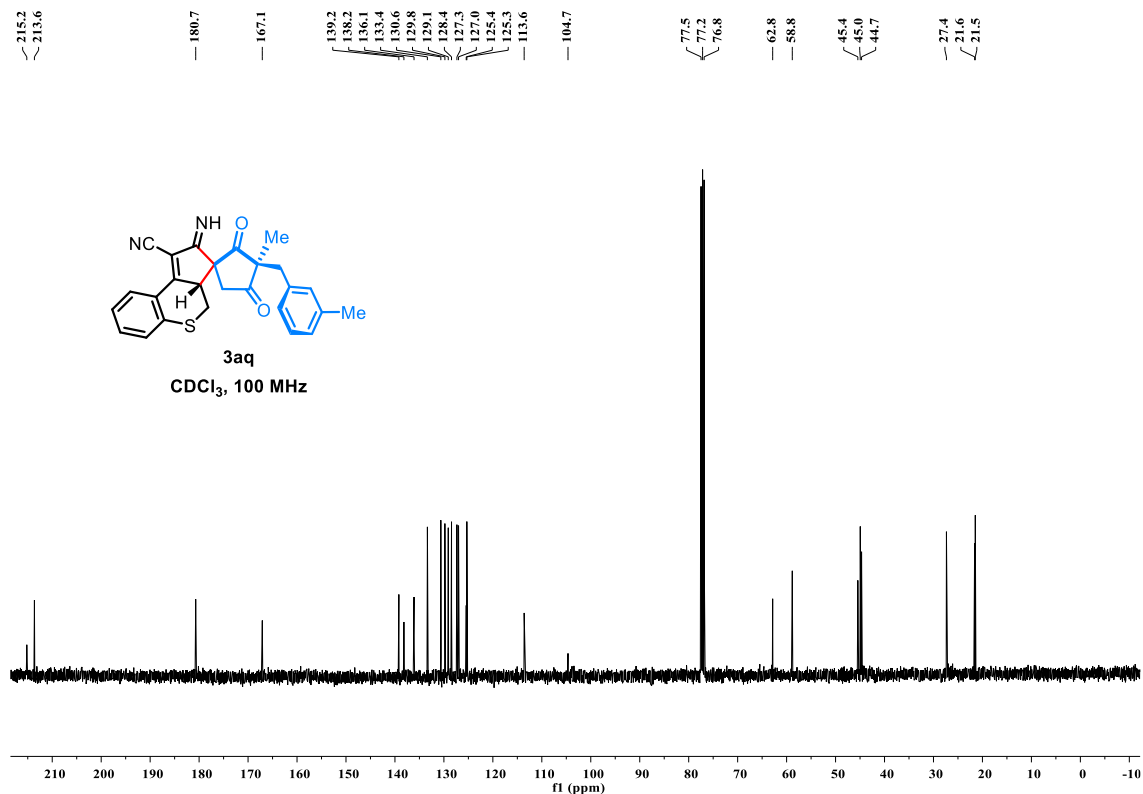

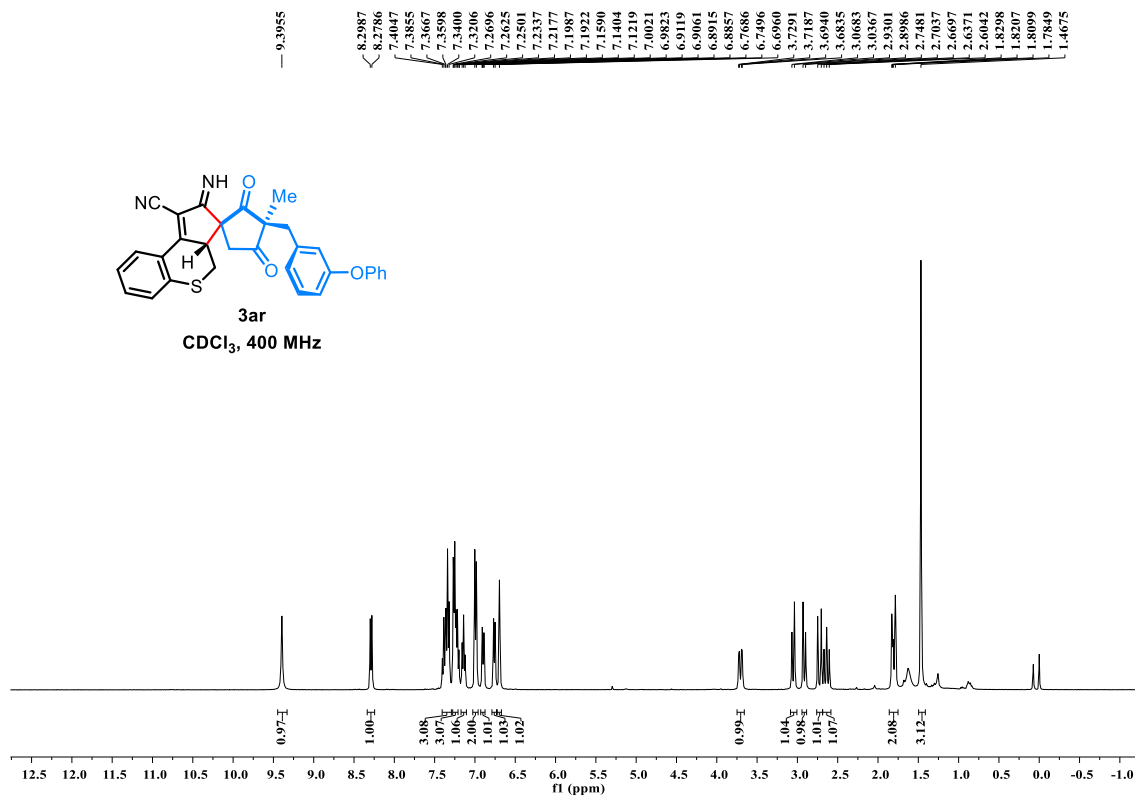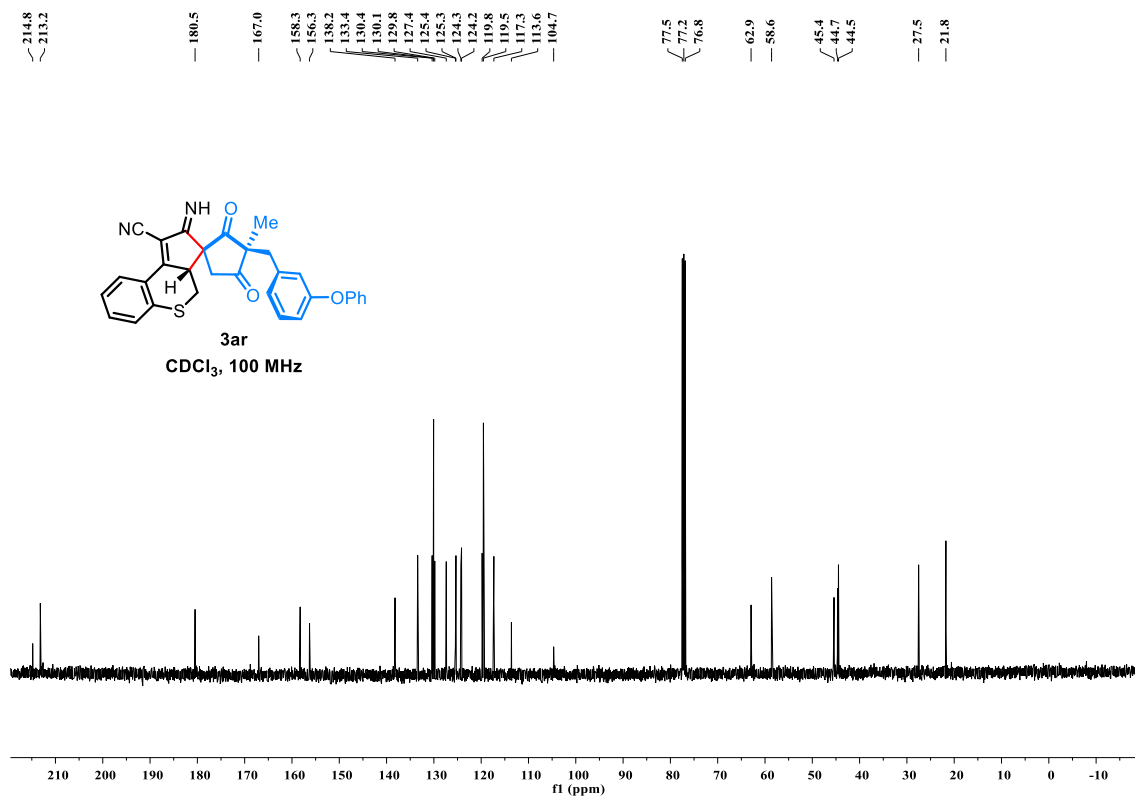

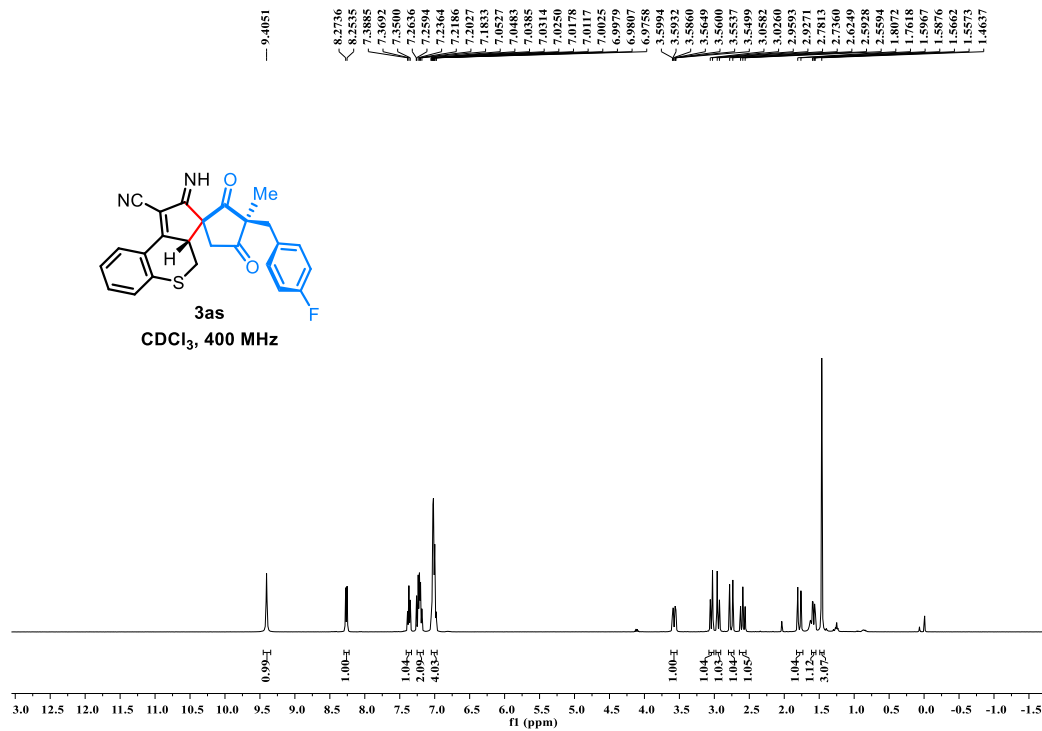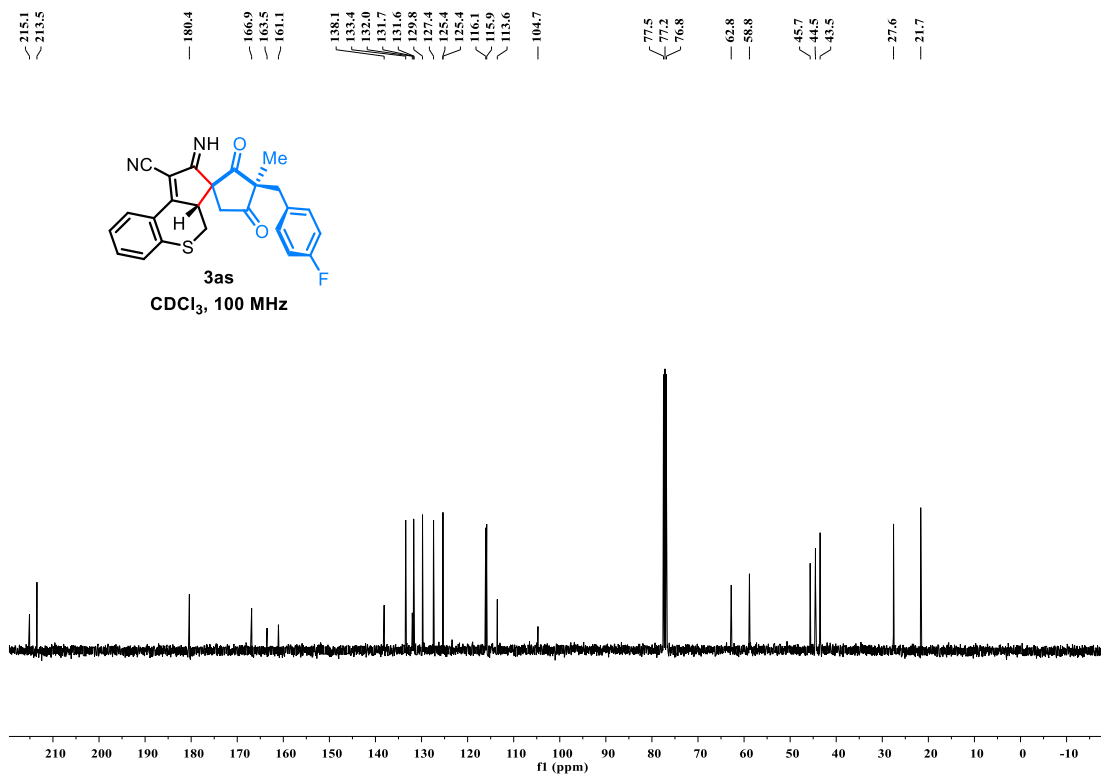



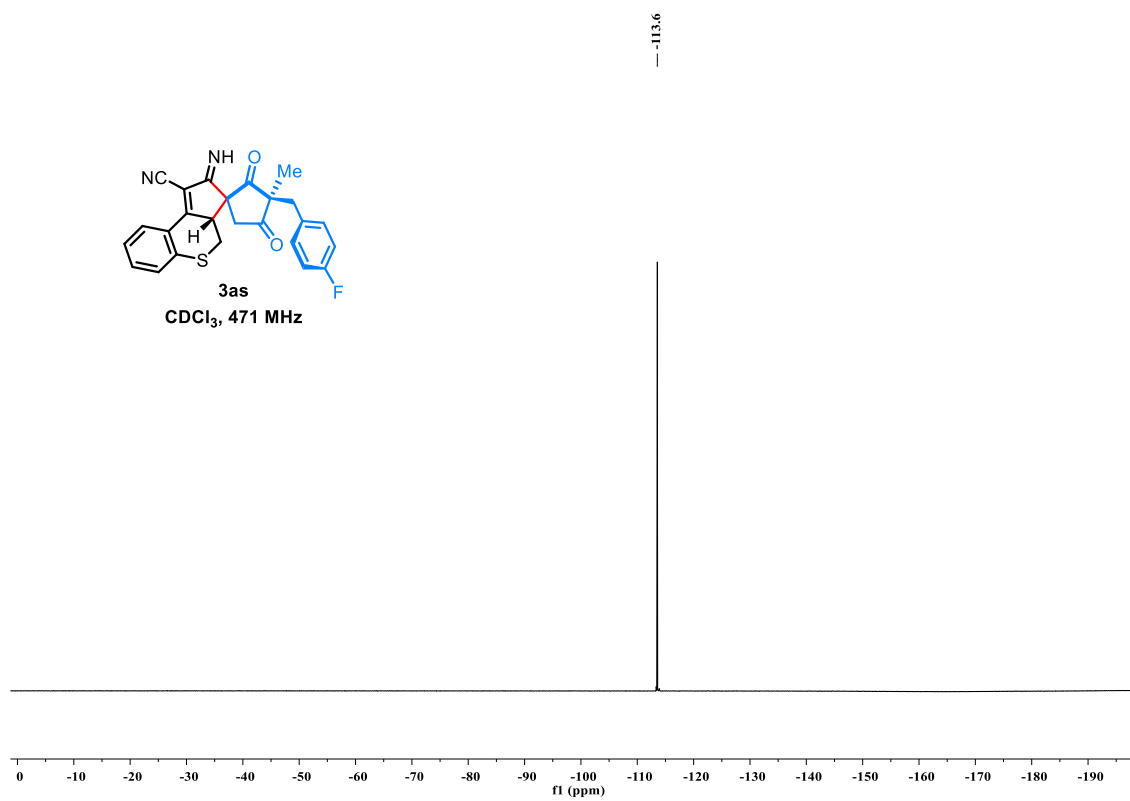

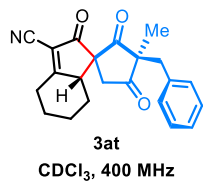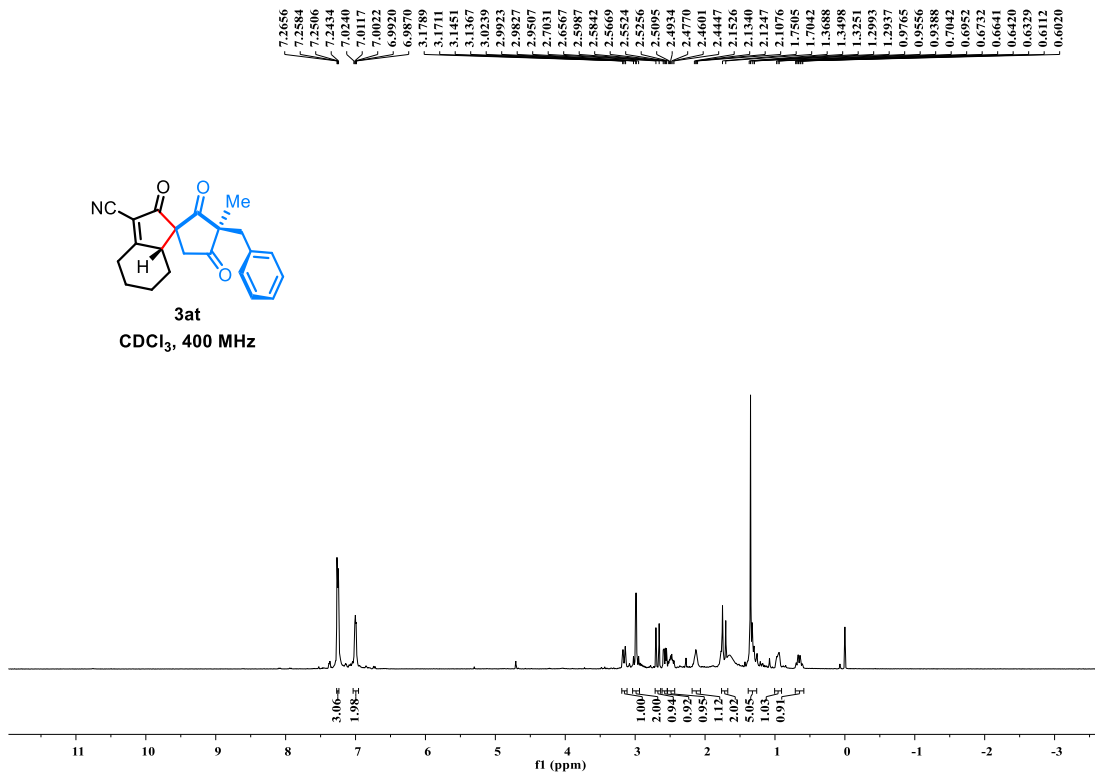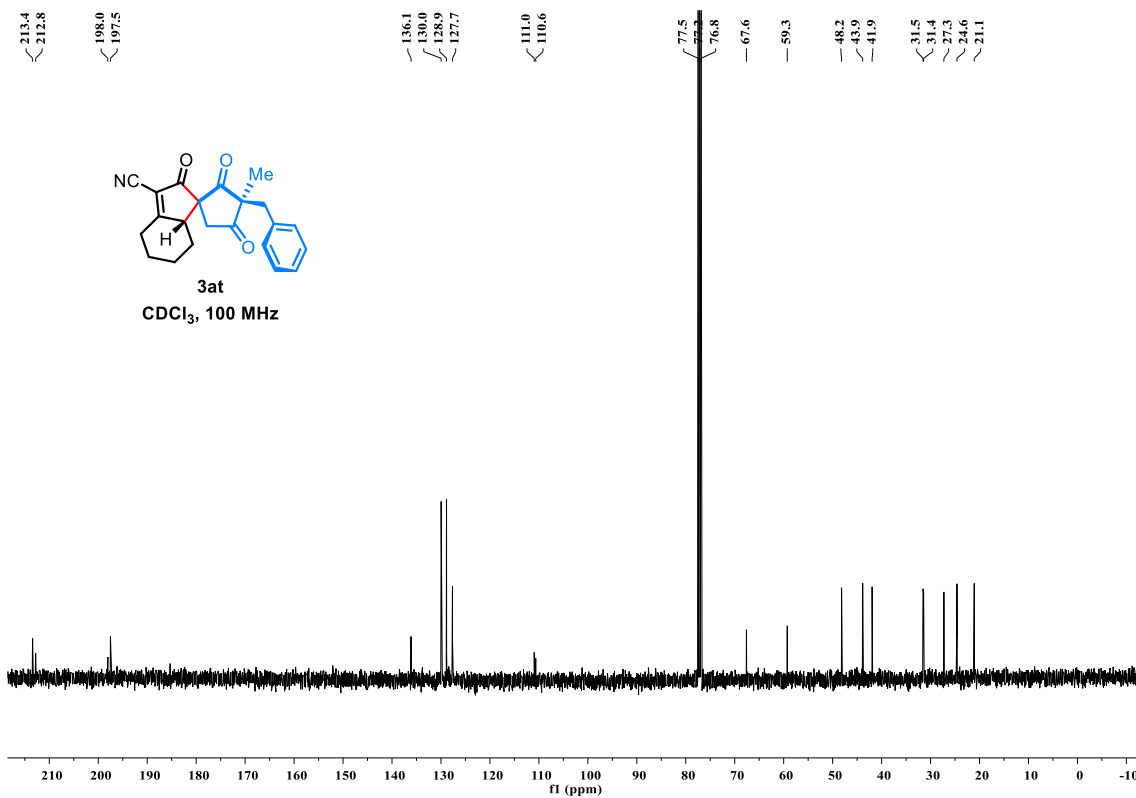

9.3493  
7.8437  
7.7676  
7.7646  
7.7609  
7.7561  
7.7519  
7.7481  
7.5833  
7.5691  
7.5634  
7.5591  
7.5556  
7.5505  
7.5466  
7.5396  
7.5353  
7.5298  
7.5259  
7.5221  
7.5176  
7.5290  
7.5253  
7.5215  
7.5158  
7.5118  
7.5080  
7.5045  
7.4985  
7.4917  
7.4839  
7.4805  
7.4745  
7.4696  
7.4631  
7.4595  
7.4546  
7.0911  
7.0875  
7.0829  
7.0777  
7.0743  
7.0714  
7.0661  
7.0613  
7.0578  
3.3134  
3.2984  
3.0731  
3.0475  
3.0310  
3.0164  
2.9705  
2.9450  
2.8584  
2.8536  
2.8180  
1.7582  
1.7225  
1.6391  
1.4340  
1.4205  
1.3571  
1.3390  
0.8775  
0.5991  
0.5843  
0.5618  
-0.5469  
-0.0048

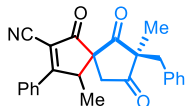

**3au**, 1:5 dr  
CDCl<sub>3</sub>, 500 MHz

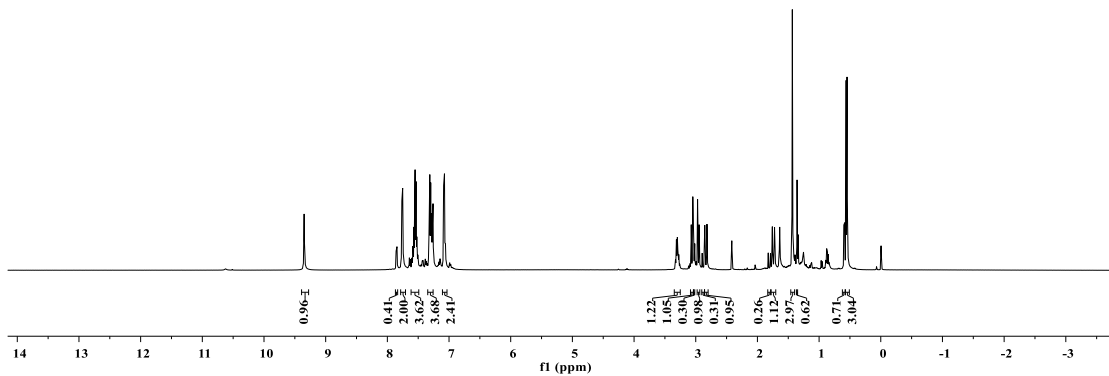

214.1  
214.0  
179.5  
177.0  
136.3  
135.1  
134.0  
132.7  
131.0  
130.0  
129.7  
129.5  
129.0  
128.9  
128.4  
128.2  
127.7  
127.6  
113.6  
107.6  
101.9  
77.4  
77.2  
76.9  
69.7  
65.2  
59.1  
44.6  
44.4  
43.8  
43.6  
42.9  
42.4  
22.6  
21.6  
17.1  
16.4

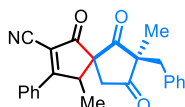

**3au**, 1:5 dr  
CDCl<sub>3</sub>, 125 MHz

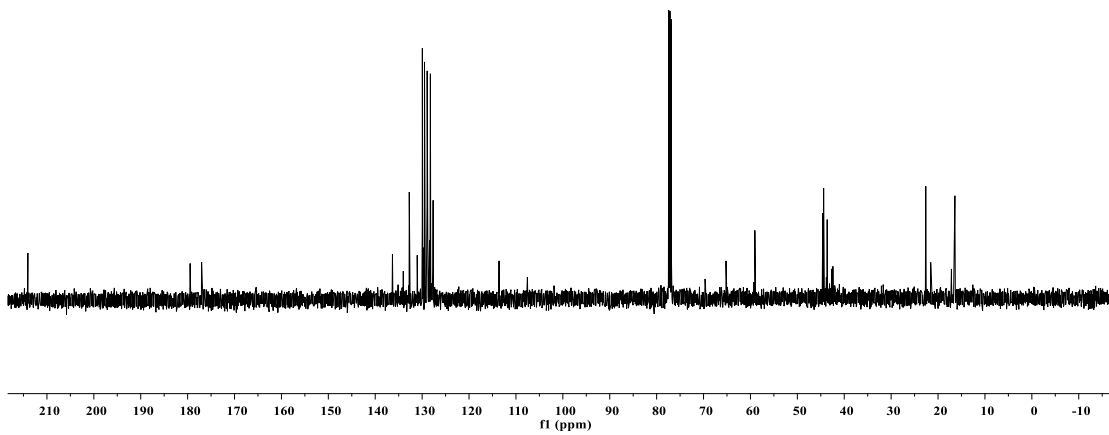

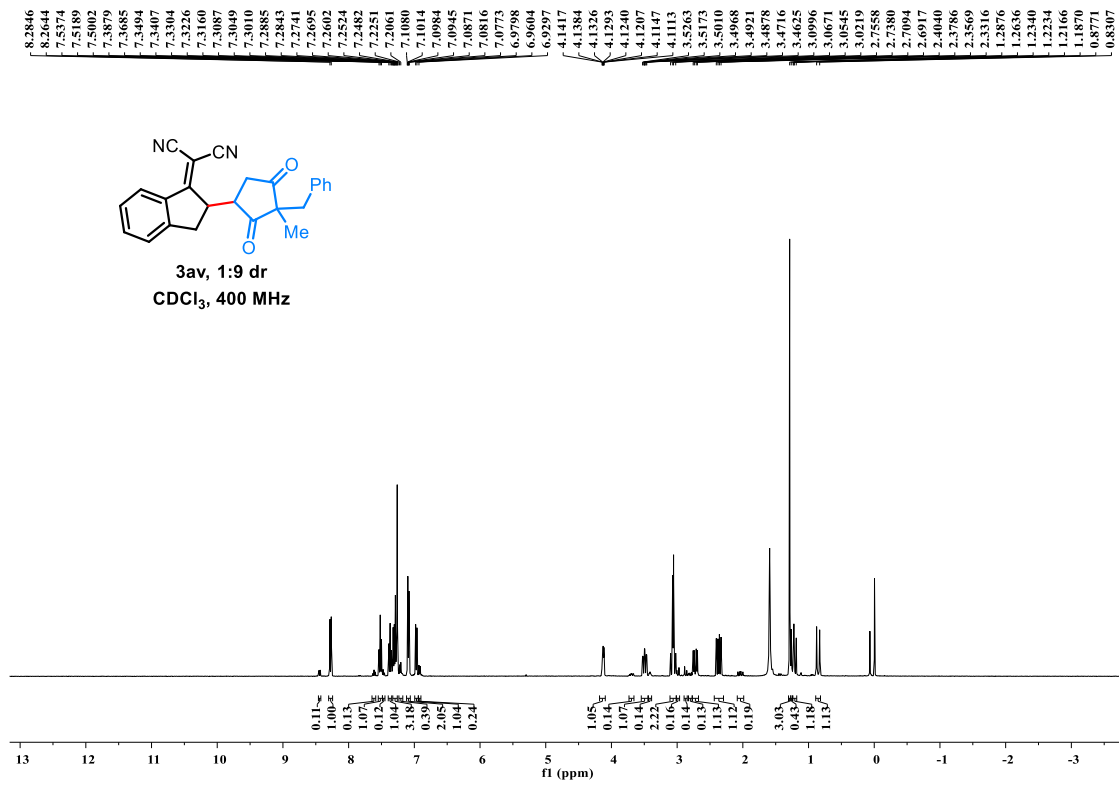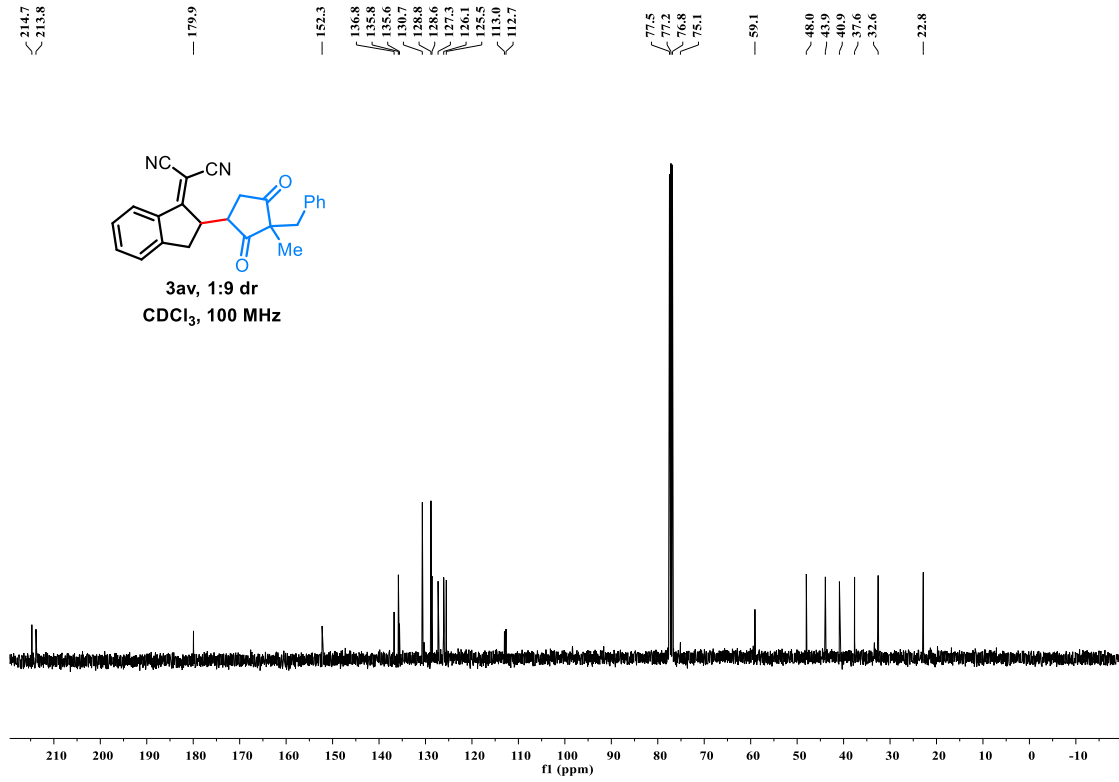

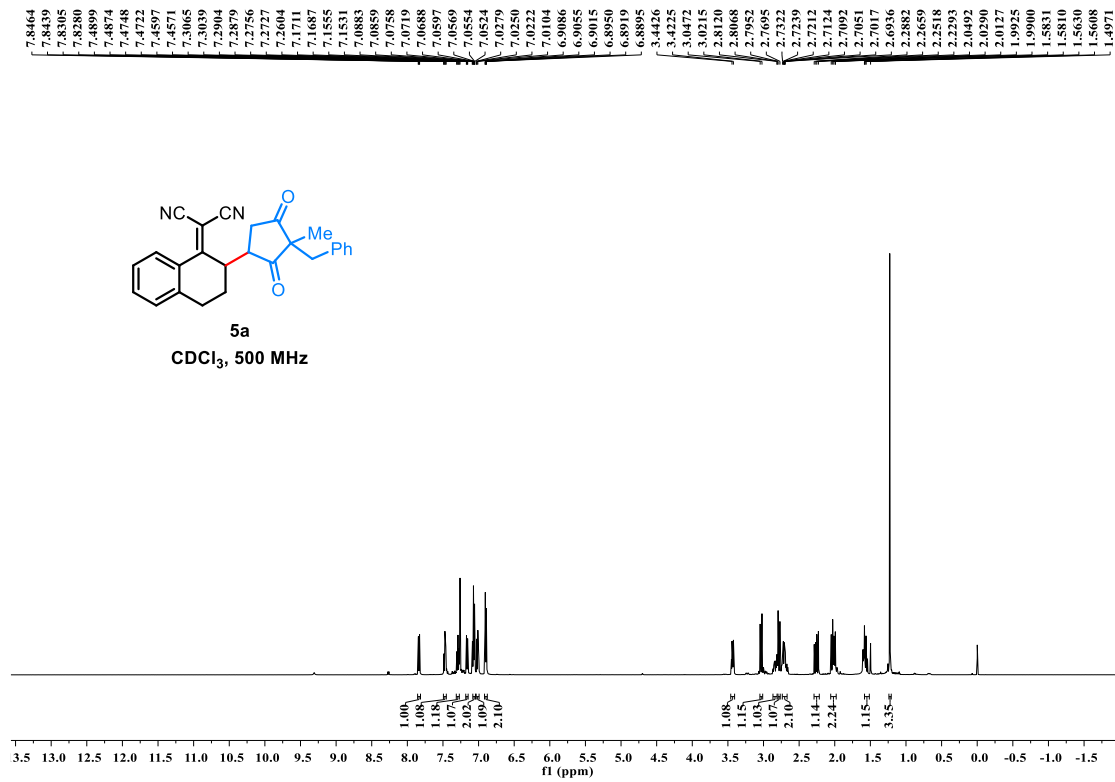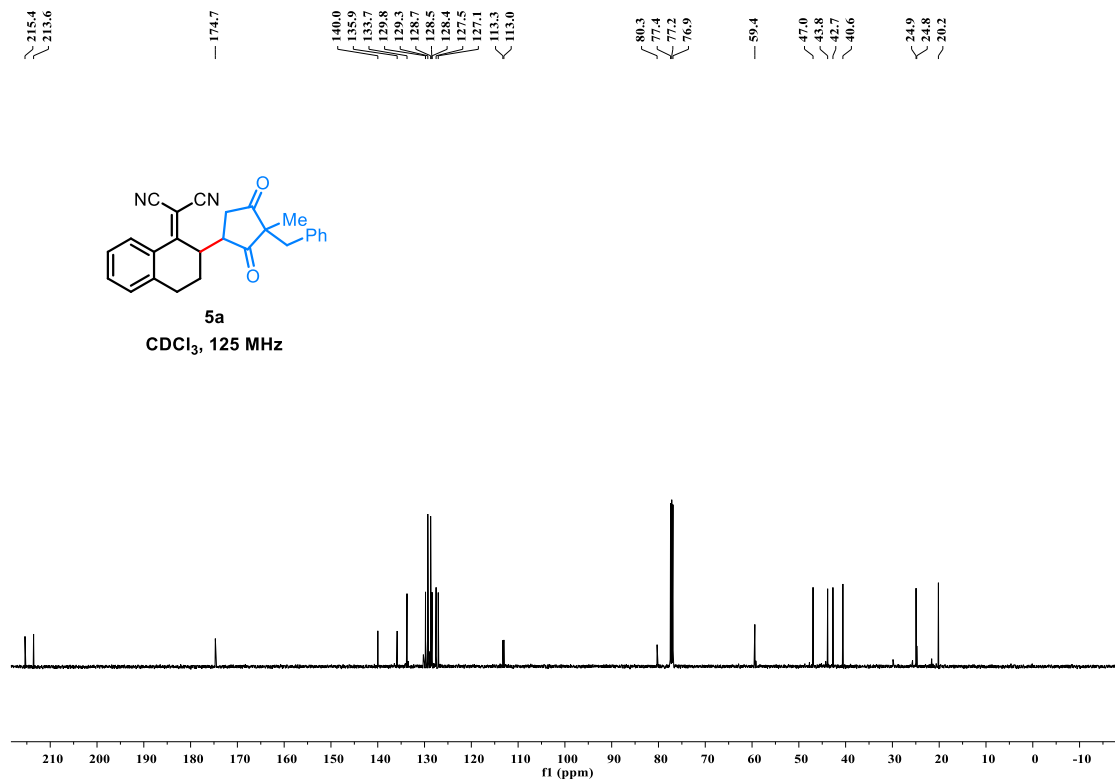

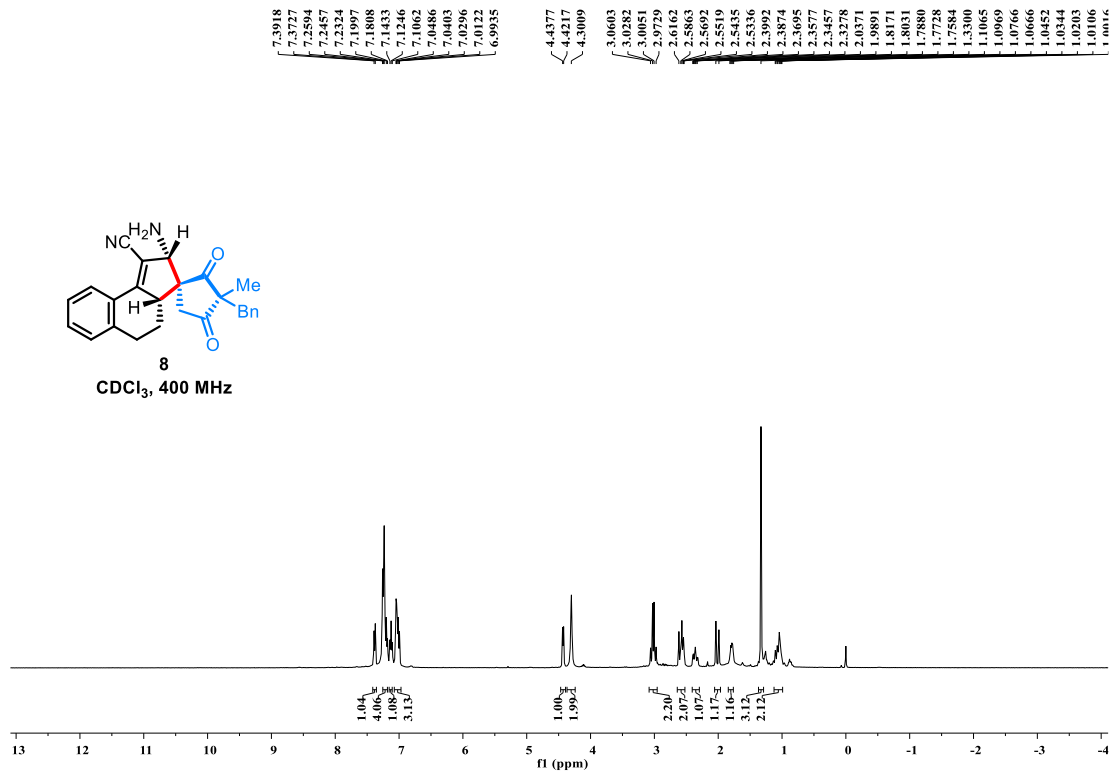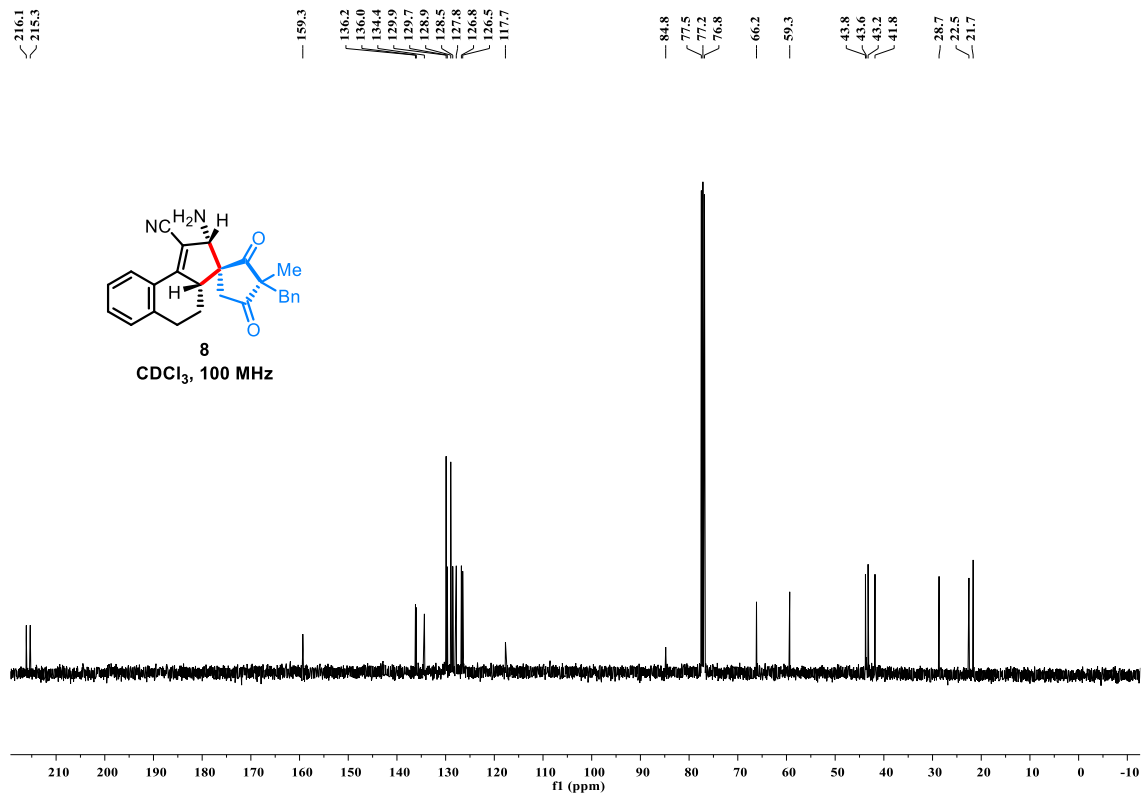

1D NOE spectra of compound **8**

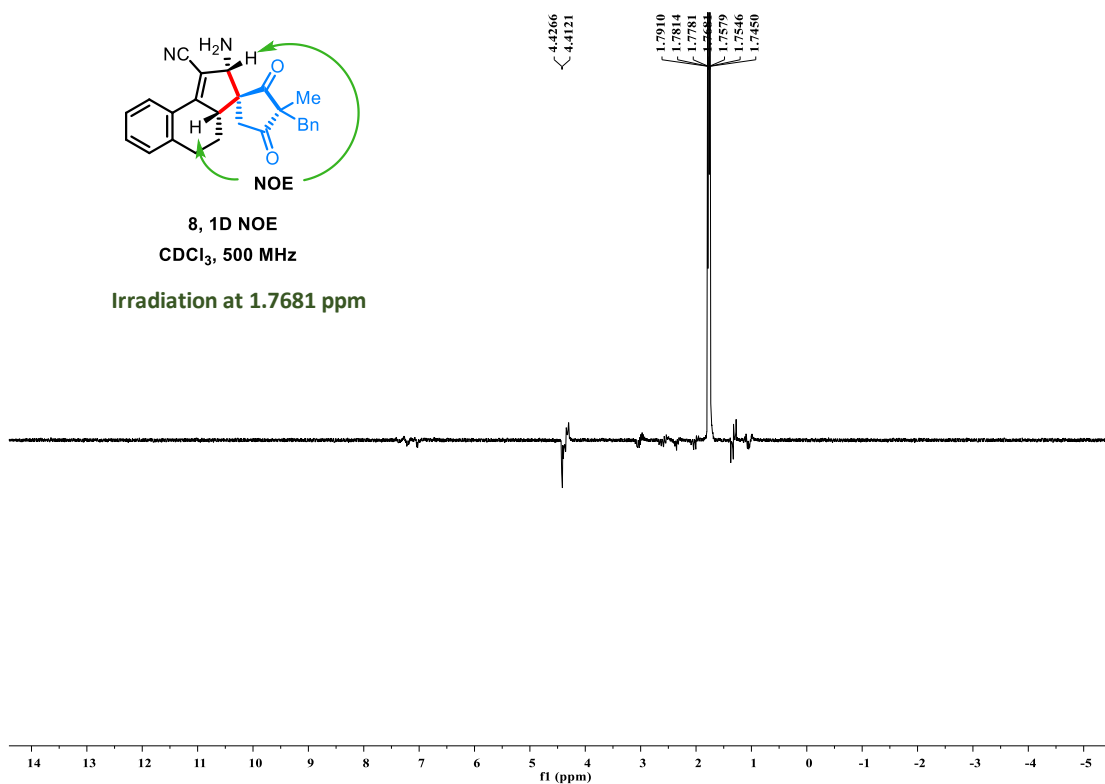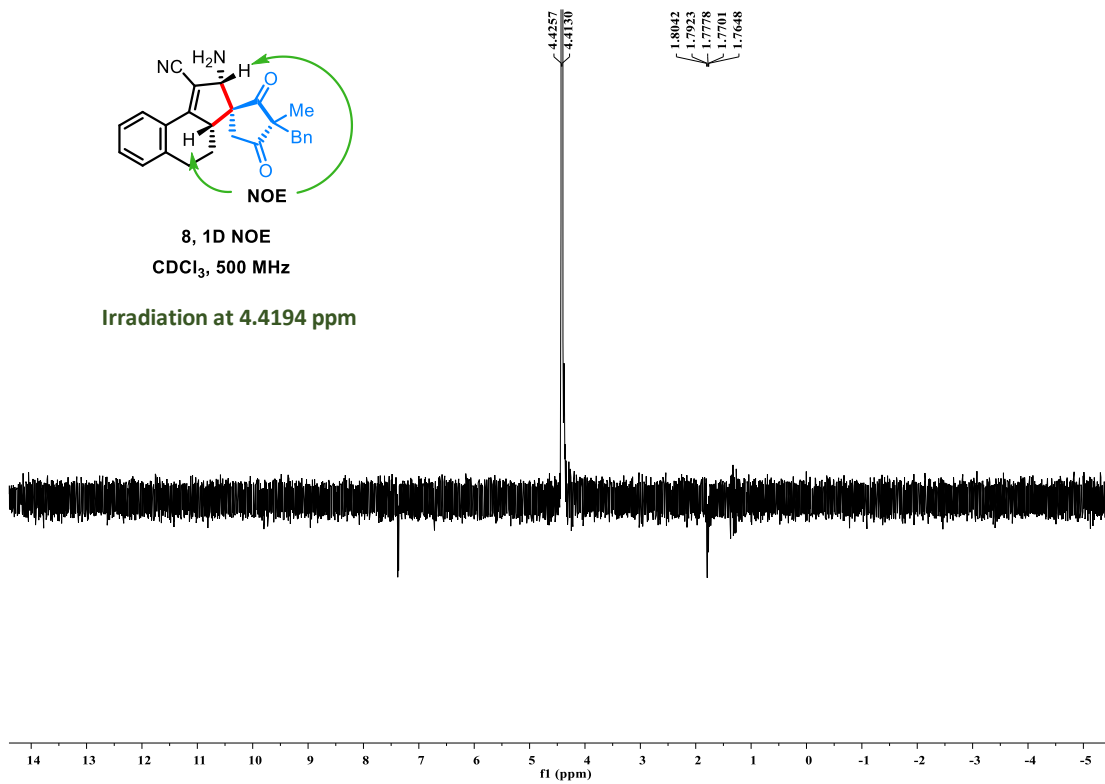

2D NOE spectrum of compound **8**

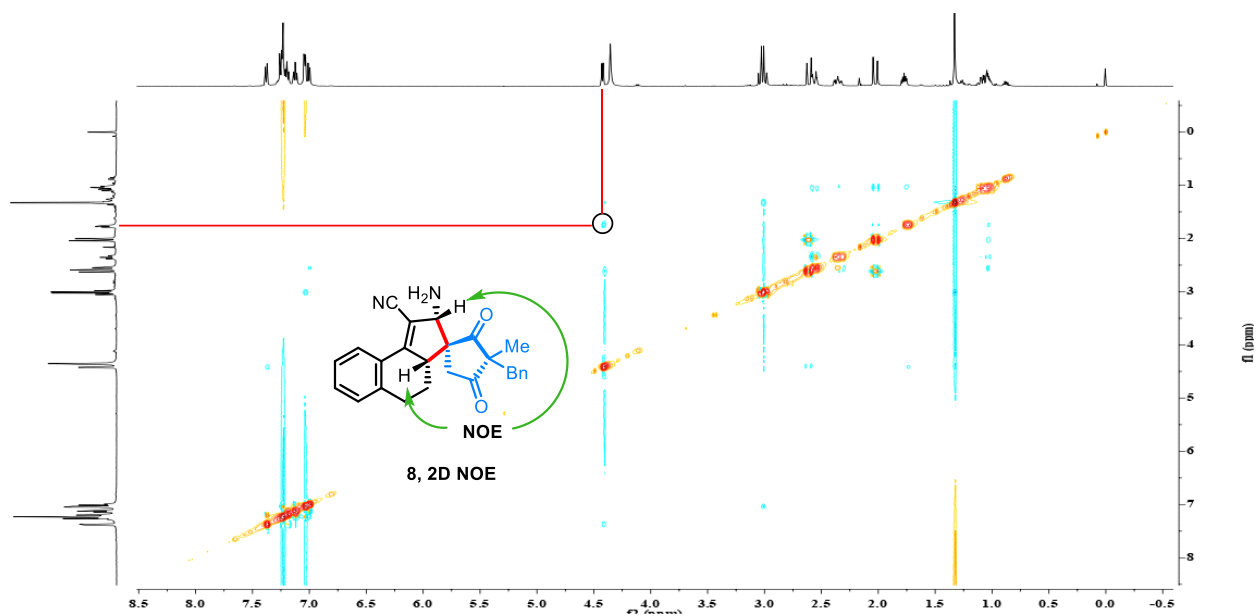



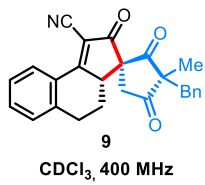

8.4116  
 8.3917  
 7.5574  
 7.5334  
 7.5145  
 7.4110  
 7.3915  
 7.3722  
 7.2761  
 7.2681  
 7.2624  
 7.0499  
 7.0433  
 7.0368  
 7.0281  
 3.2557  
 3.2451  
 3.2201  
 3.2094  
 3.0665  
 3.0328  
 3.0255  
 2.9952  
 2.9168  
 2.9043  
 2.8732  
 2.8604  
 2.8449  
 2.8344  
 2.8159  
 2.8035  
 2.7435  
 2.6968  
 1.9382  
 1.8916  
 1.4322  
 1.2604  
 1.2281  
 1.2154  
 1.1968  
 1.1834  
 1.1644  
 1.1508  
 1.1322  
 1.1187  
 0.7695  
 0.7574  
 0.7412  
 0.7261  
 0.7147

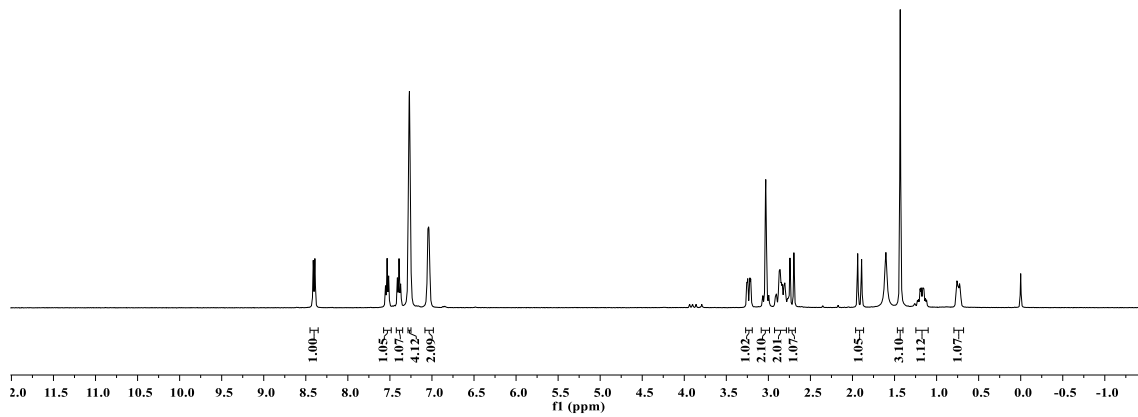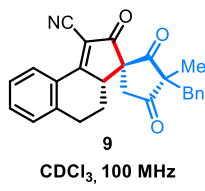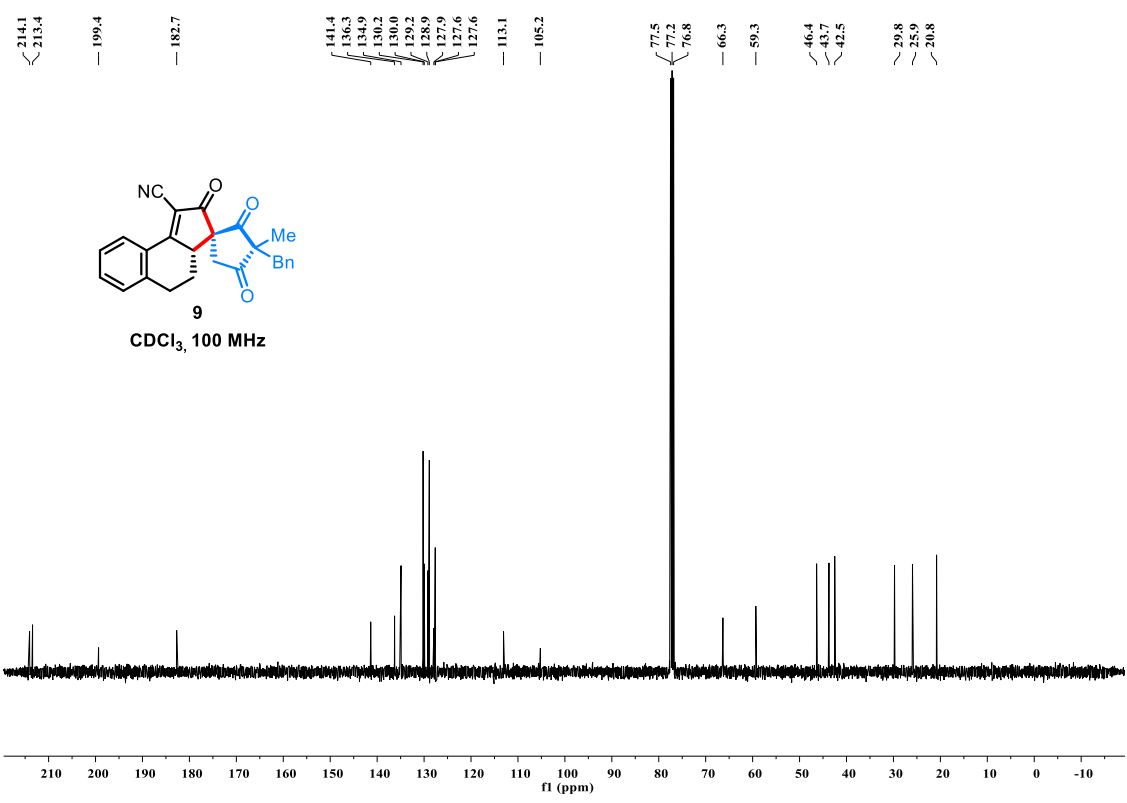

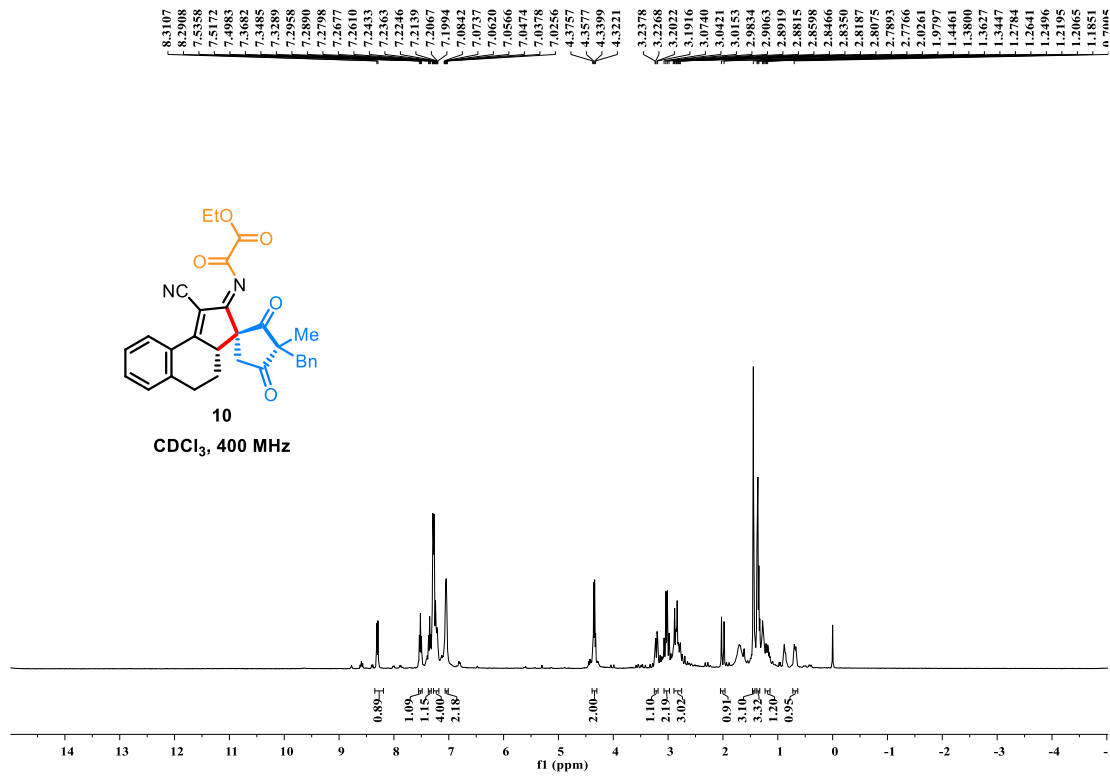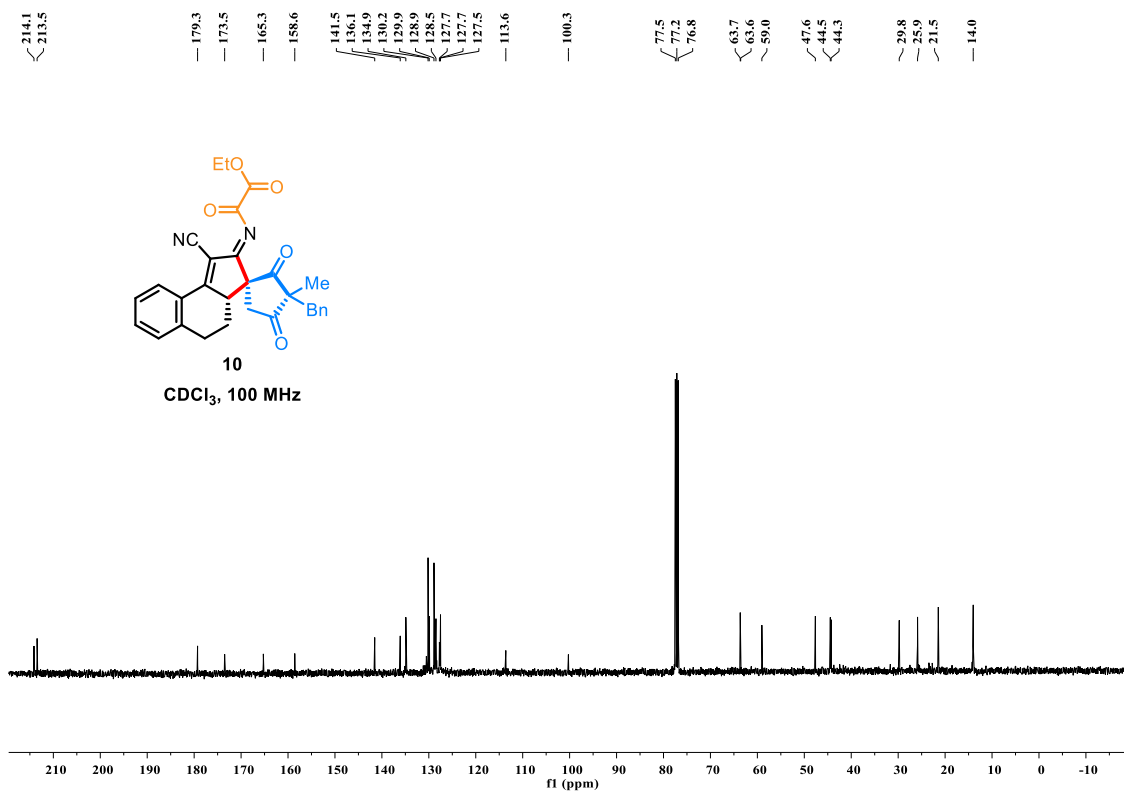

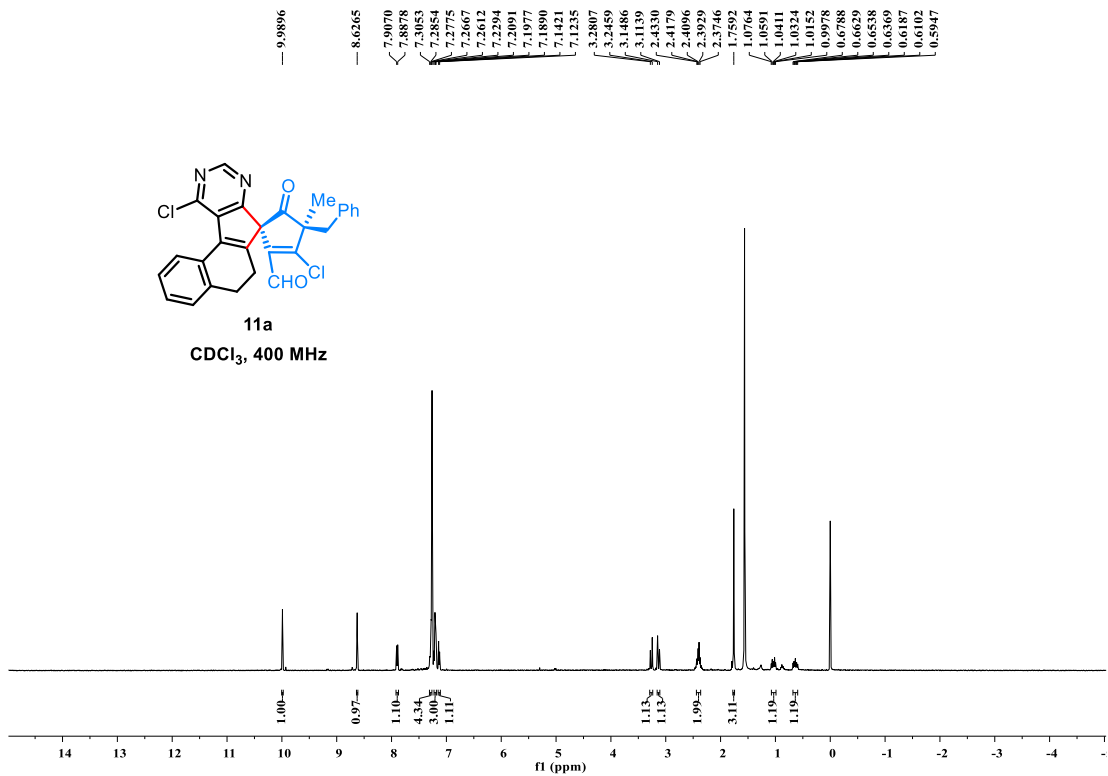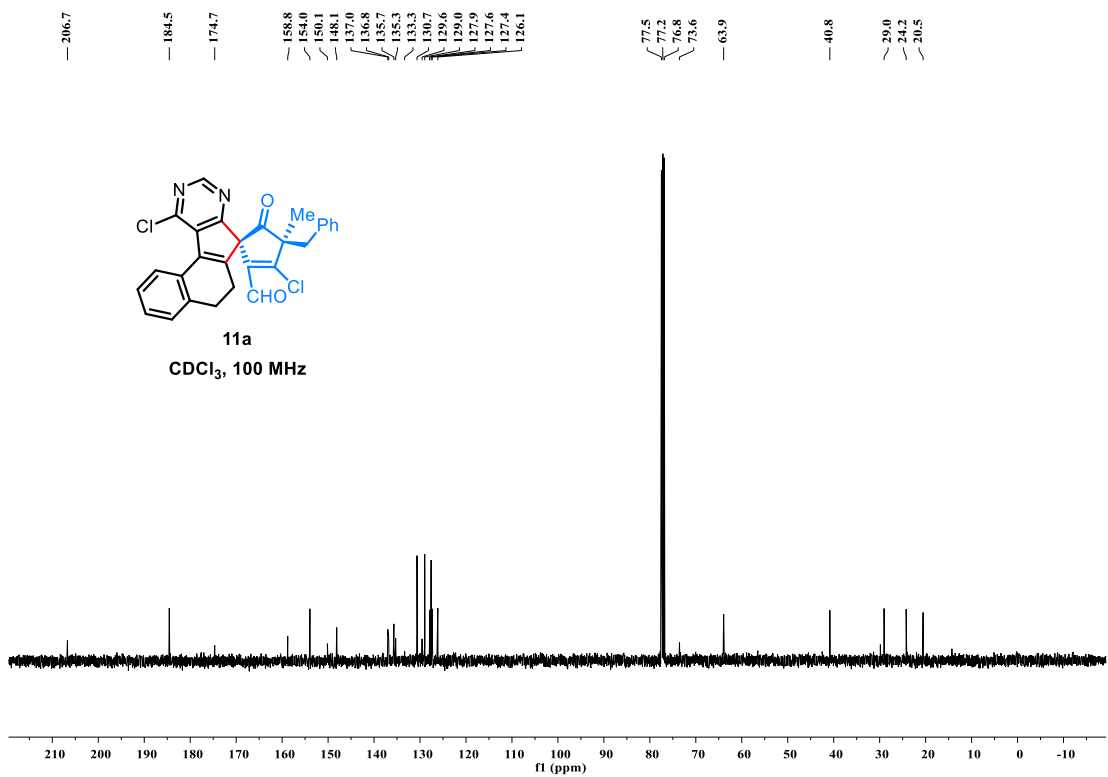

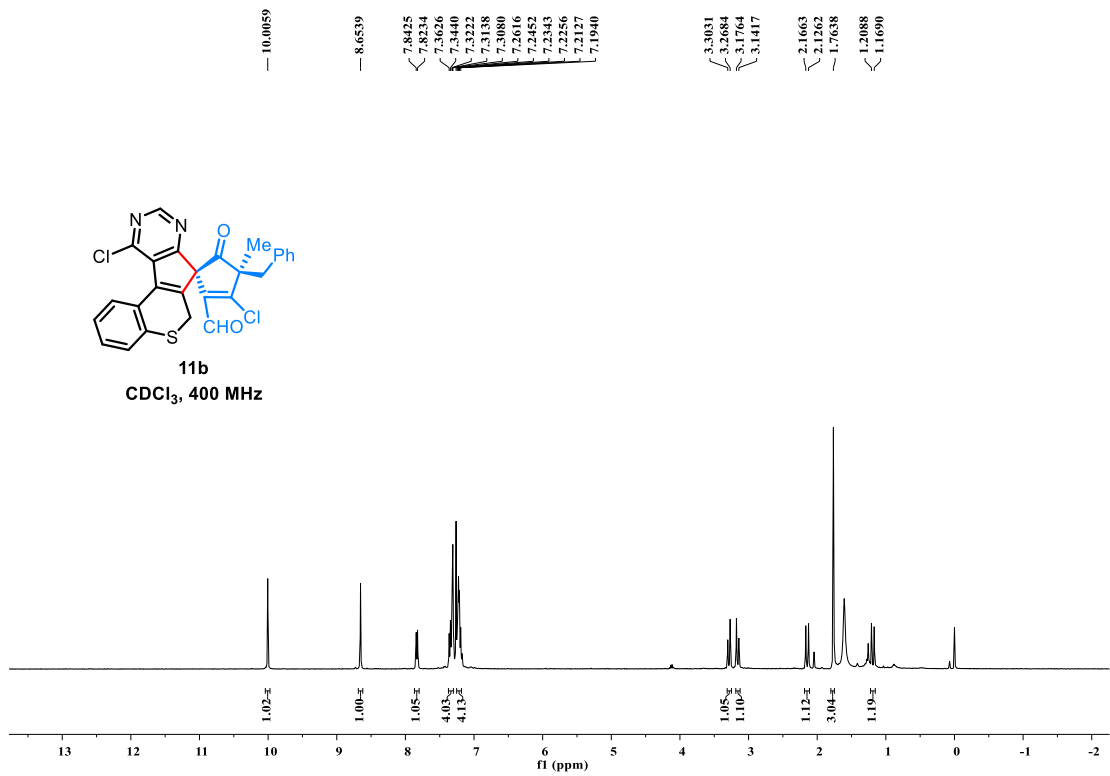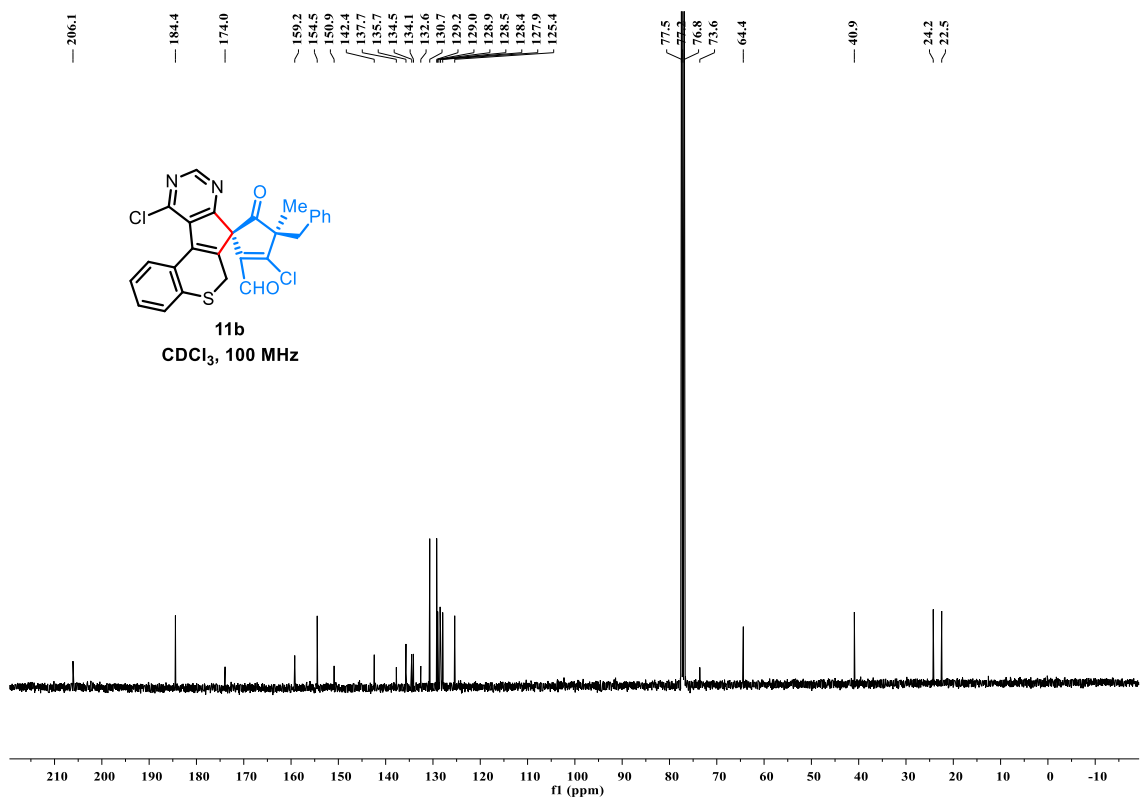

Supplement: d1cc06544k1.pdf [file d1cc06544k1.pdf]
